# Supplementary material for: Oxygenated Cembrene Diterpenes from Sarcophyton convolutum: Cytotoxic Sarcoconvolutum A–E
Source: MDPI journal article supplement (doi:10.3390/md19090519), 2021-09-13
Supplement: s1 [file s1]

## Supplementary material

# Oxygenated cembrene diterpenes from *Sarcophyton convolutum*: cytotoxic sarcoconvolutum A-E

Tarik A. Mohamed<sup>1</sup>, Abdelsamed I. Elshamy<sup>2</sup>, Asmaa M. Abdel-Tawab<sup>3</sup>, Mona M. AbdelMohsen<sup>1</sup>, Shinji Ohta<sup>4</sup>, Paul W. Pare<sup>5,\*</sup>, Mohamed-Elamir F. Hegazy<sup>1,6,\*</sup>

<sup>1</sup> Chemistry of Medicinal Plants Department, National Research Centre, 33 El-Bohouth St., Dokki, Giza 12622, Egypt; [ta.mourad@nrc.sci.eg](mailto:ta.mourad@nrc.sci.eg) (T.A.M.); [monaamohsen@yahoo.com](mailto:monaamohsen@yahoo.com) (M.M.A.)

<sup>2</sup> Department of Natural Compounds Chemistry, National Research Centre, 33 El-Bohouth St., Dokki, Giza 12622, Egypt; [ai.el-shamy@nrc.sci.eg](mailto:ai.el-shamy@nrc.sci.eg) (A.I.E.).

<sup>3</sup> Marine Biotechnology and Natural Products Laboratory, National Institute of Oceanography and Fisheries, Cairo, Egypt; [ch\\_smsm84@yahoo.com](mailto:ch_smsm84@yahoo.com), [am.eltawab@niof.sci.eg](mailto:am.eltawab@niof.sci.eg) (A.M.A.)

<sup>4</sup> Graduate School of Integrated Sciences for Life, Hiroshima University, 1-7-1 Kagamiyama, Higashi-Hiroshima 739-8521, Japan; [ohta@hiroshima-u.ac.jp](mailto:ohta@hiroshima-u.ac.jp) (S.O.).

<sup>5</sup> Department of Chemistry & Biochemistry Texas Tech University, Lubbock, TX 79409 USA; [paul.pare@ttu.edu](mailto:paul.pare@ttu.edu) (P.W.P.).

<sup>6</sup> Department of Pharmaceutical Biology, Institute of Pharmaceutical and Biomedical Sciences, Johannes Gutenberg University, Staudinger Weg 5, 55128 Mainz, Germany.

\* Correspondence: [paul.pare@ttu.edu](mailto:paul.pare@ttu.edu) (P.W.P.); [mohegazy@uni-mainz.de](mailto:mohegazy@uni-mainz.de) (M.E.F.H.); Tel.: +1-806-834-0461(P.W.P); Tel.: +2 033 371 635 (M.E.F.H)

| Supporting data                                          | Page |
|----------------------------------------------------------|------|
| S1: FTIR of <b>1</b> .....                               | 4    |
| S2: LRCIMS of <b>1</b> .....                             | 5    |
| S3: HRCIMS of <b>1</b> .....                             | 6    |
| S4: <sup>1</sup> H NMR of <b>1</b> .....                 | 7    |
| S5: <sup>13</sup> C NMR of <b>1</b> .....                | 8    |
| S6: DEPT 135 of <b>1</b> .....                           | 9    |
| S7: HSQC of <b>1</b> .....                               | 10   |
| S8: HMBC of <b>1</b> .....                               | 11   |
| S9: <sup>1</sup> H <sup>1</sup> H COSY of <b>1</b> ..... | 12   |
| S10: NOESY of <b>1</b> .....                             | 13   |
| S11: FTIR of <b>2</b> .....                              | 14   |
| S12: LRCIMS of <b>2</b> .....                            | 15   |
| S13: HRCIMS of <b>2</b> .....                            | 16   |

|                                                       |    |
|-------------------------------------------------------|----|
| S14: $^1\text{H}$ NMR of <b>2</b> .....               | 17 |
| S15: $^{13}\text{C}$ NMR of <b>2</b> .....            | 18 |
| S16: DEPT 135 of <b>2</b> .....                       | 19 |
| S17: HSQC of <b>2</b> .....                           | 20 |
| S18: HMBC of <b>2</b> .....                           | 21 |
| S19: $^1\text{H}$ $^1\text{H}$ COSY of <b>2</b> ..... | 22 |
| S20: NOESY of <b>2</b> .....                          | 23 |
| S21: FTIR of <b>3</b> .....                           | 24 |
| S22: LRCIMS of <b>3</b> .....                         | 25 |
| S23: HRCIMS of <b>3</b> .....                         | 26 |
| S24: $^1\text{H}$ NMR of <b>3</b> .....               | 27 |
| S25: $^{13}\text{C}$ NMR of <b>3</b> .....            | 28 |
| S26: DEPT 135 of <b>3</b> .....                       | 29 |
| S27: HSQC of <b>3</b> .....                           | 30 |
| S28: HMBC of <b>3</b> .....                           | 31 |
| S29: $^1\text{H}$ $^1\text{H}$ COSY of <b>3</b> ..... | 32 |
| S30: NOESY of <b>3</b> .....                          | 33 |
| S31: FTIR of <b>4</b> .....                           | 34 |
| S32: LRCIMS of <b>4</b> .....                         | 35 |
| S33: HRCIMS of <b>4</b> .....                         | 36 |
| S34: $^1\text{H}$ NMR of <b>4</b> .....               | 37 |
| S35: $^{13}\text{C}$ NMR of <b>4</b> .....            | 38 |
| S36: DEPT 135 of <b>4</b> .....                       | 39 |
| S37: HSQC of <b>4</b> .....                           | 40 |
| S38: HMBC of <b>4</b> .....                           | 41 |
| S39: $^1\text{H}$ $^1\text{H}$ COSY of <b>4</b> ..... | 42 |
| S40: NOESY of <b>4</b> .....                          | 43 |
| S41: FTIR of <b>5</b> .....                           | 44 |
| S42: LRCIMS of <b>5</b> .....                         | 45 |
| S43: HRCIMS of <b>5</b> .....                         | 46 |
| S44: $^1\text{H}$ NMR of <b>5</b> .....               | 47 |
| S45: $^{13}\text{C}$ NMR of <b>5</b> .....            | 48 |

|                                                       |    |
|-------------------------------------------------------|----|
| S46: DEPT 135 of <b>5</b> .....                       | 49 |
| S47: HSQC of <b>5</b> .....                           | 50 |
| S48: HMBC of <b>5</b> .....                           | 51 |
| S49: $^1\text{H}$ $^1\text{H}$ COSY of <b>5</b> ..... | 52 |
| S50: NOESY of <b>5</b> .....                          | 53 |

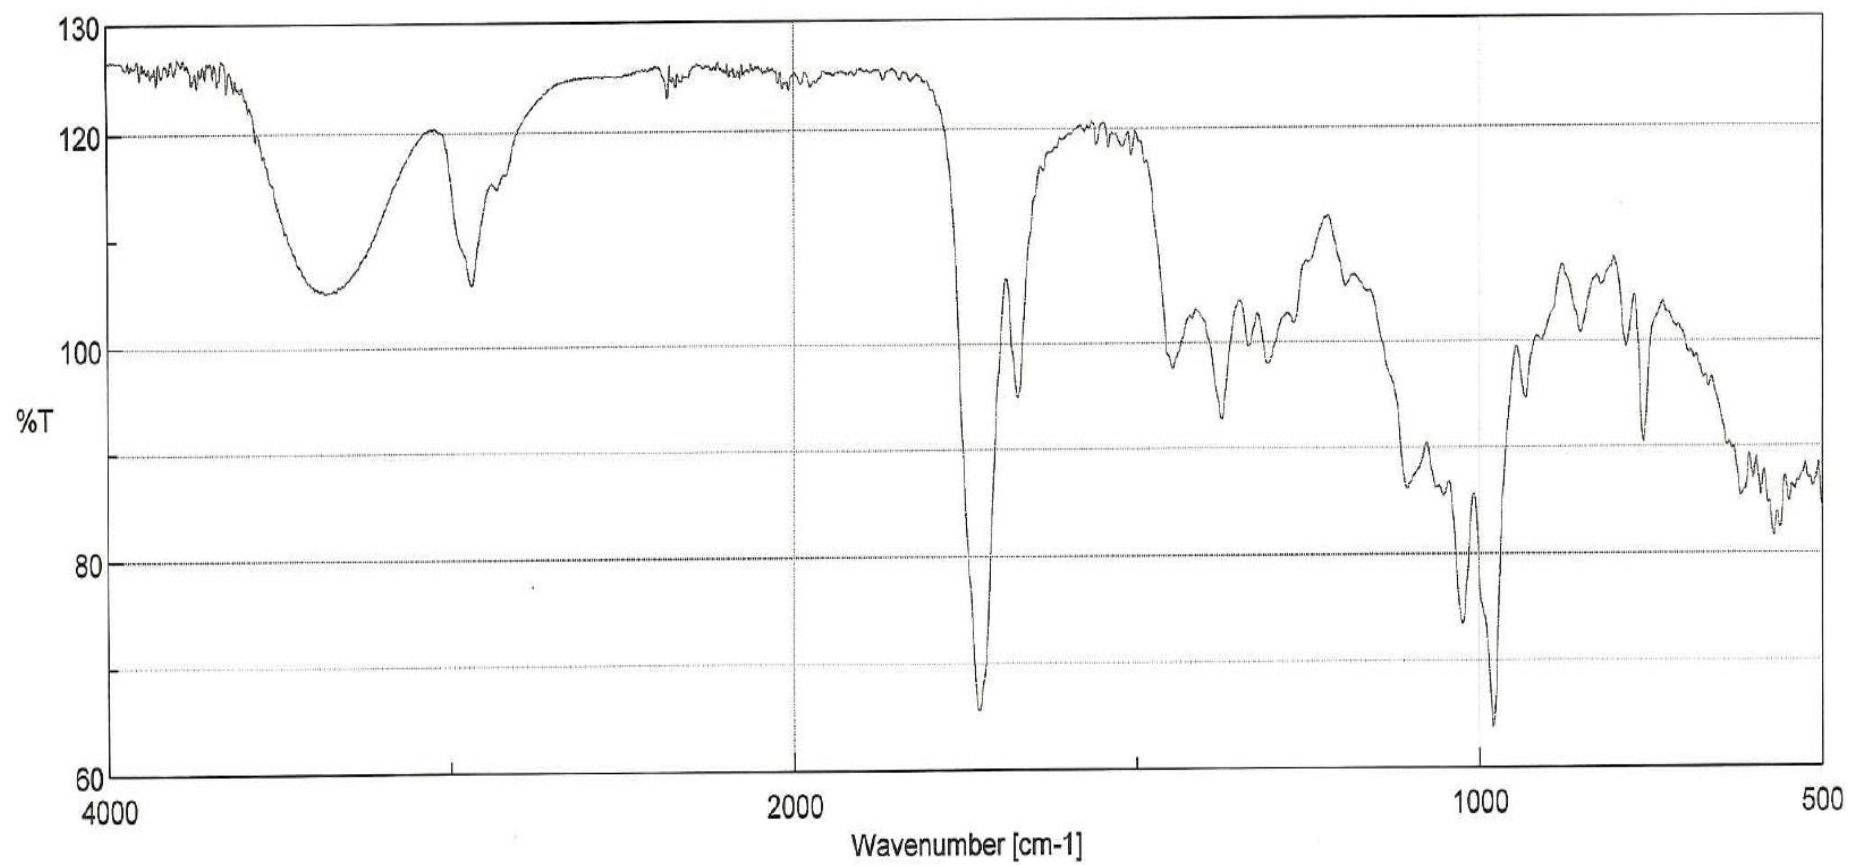

S1: FTIR of **1**

Inlet : Direct Ion Mode : C<sup>+</sup>  
Spectrum Type : Normal Ion [MF-Linear]  
RT : 2.24 min Scan# : 83  
BP : m/z 333 Int. : 399.34 (4187328)  
Output m/z range : 35 to 500 Cut Level : 0.00 %

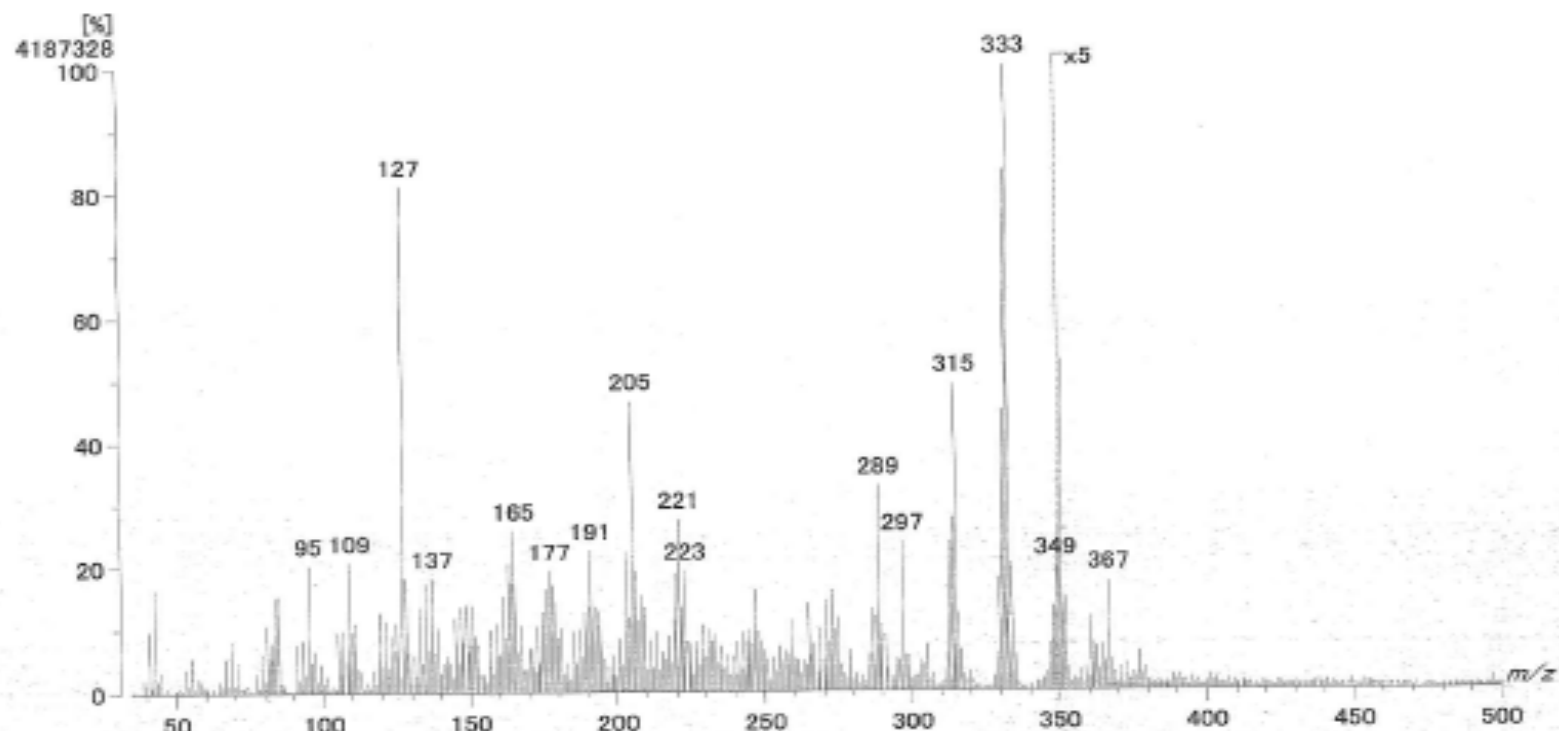

S2: LRCIMS of 1

Note : MStation

Inlet : Direct      Ion Mode : CI+

RT : 1.92 min      Scan# : 49

Elements : C 150/0, H 250/0, O 50/0

Mass Tolerance : 5mmu

Unsaturation (U.S.) : 0.0 – 15.0

|   | Observed m/z | Int% | Err [ppm / mmu] | U.S. Composition |
|---|--------------|------|-----------------|------------------|
| 1 | 367.2122     | 4.78 | +0.4 / +0.1     | 5.5 C20 H31 O6   |

S3: HRCIMS of 1

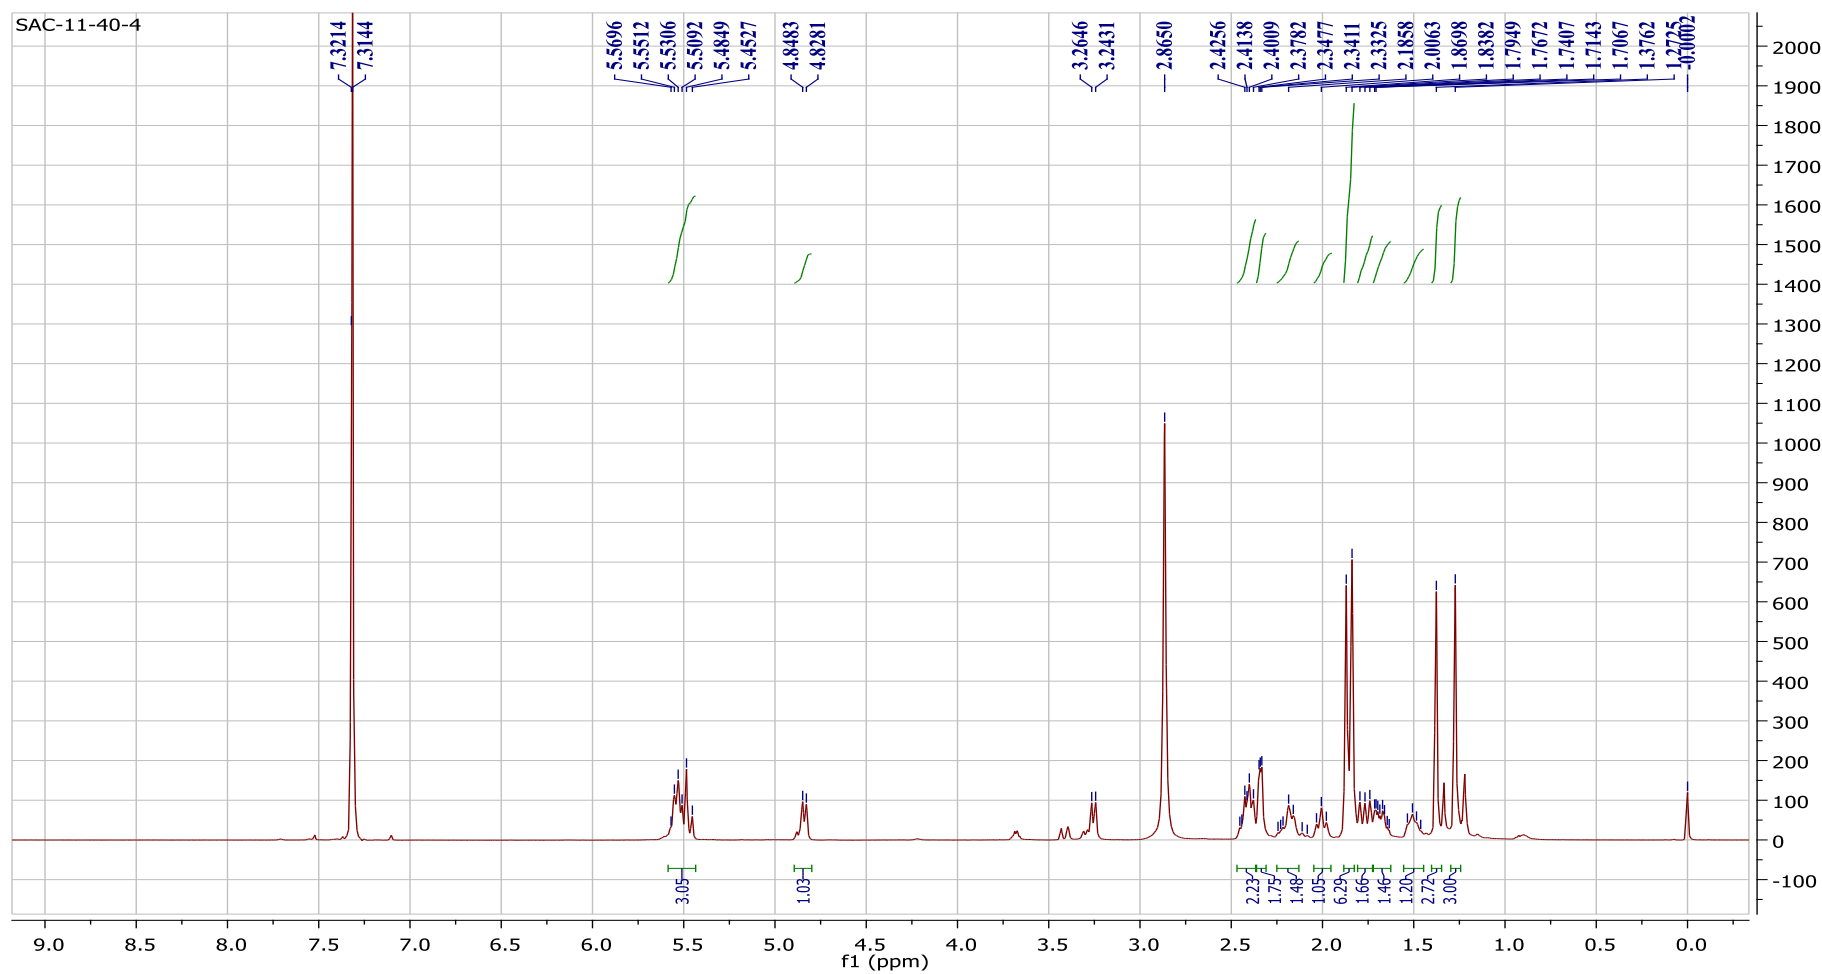

S4:  $^1\text{H}$  NMR of **1** (500 Hz,  $\text{CDCl}_3$ )

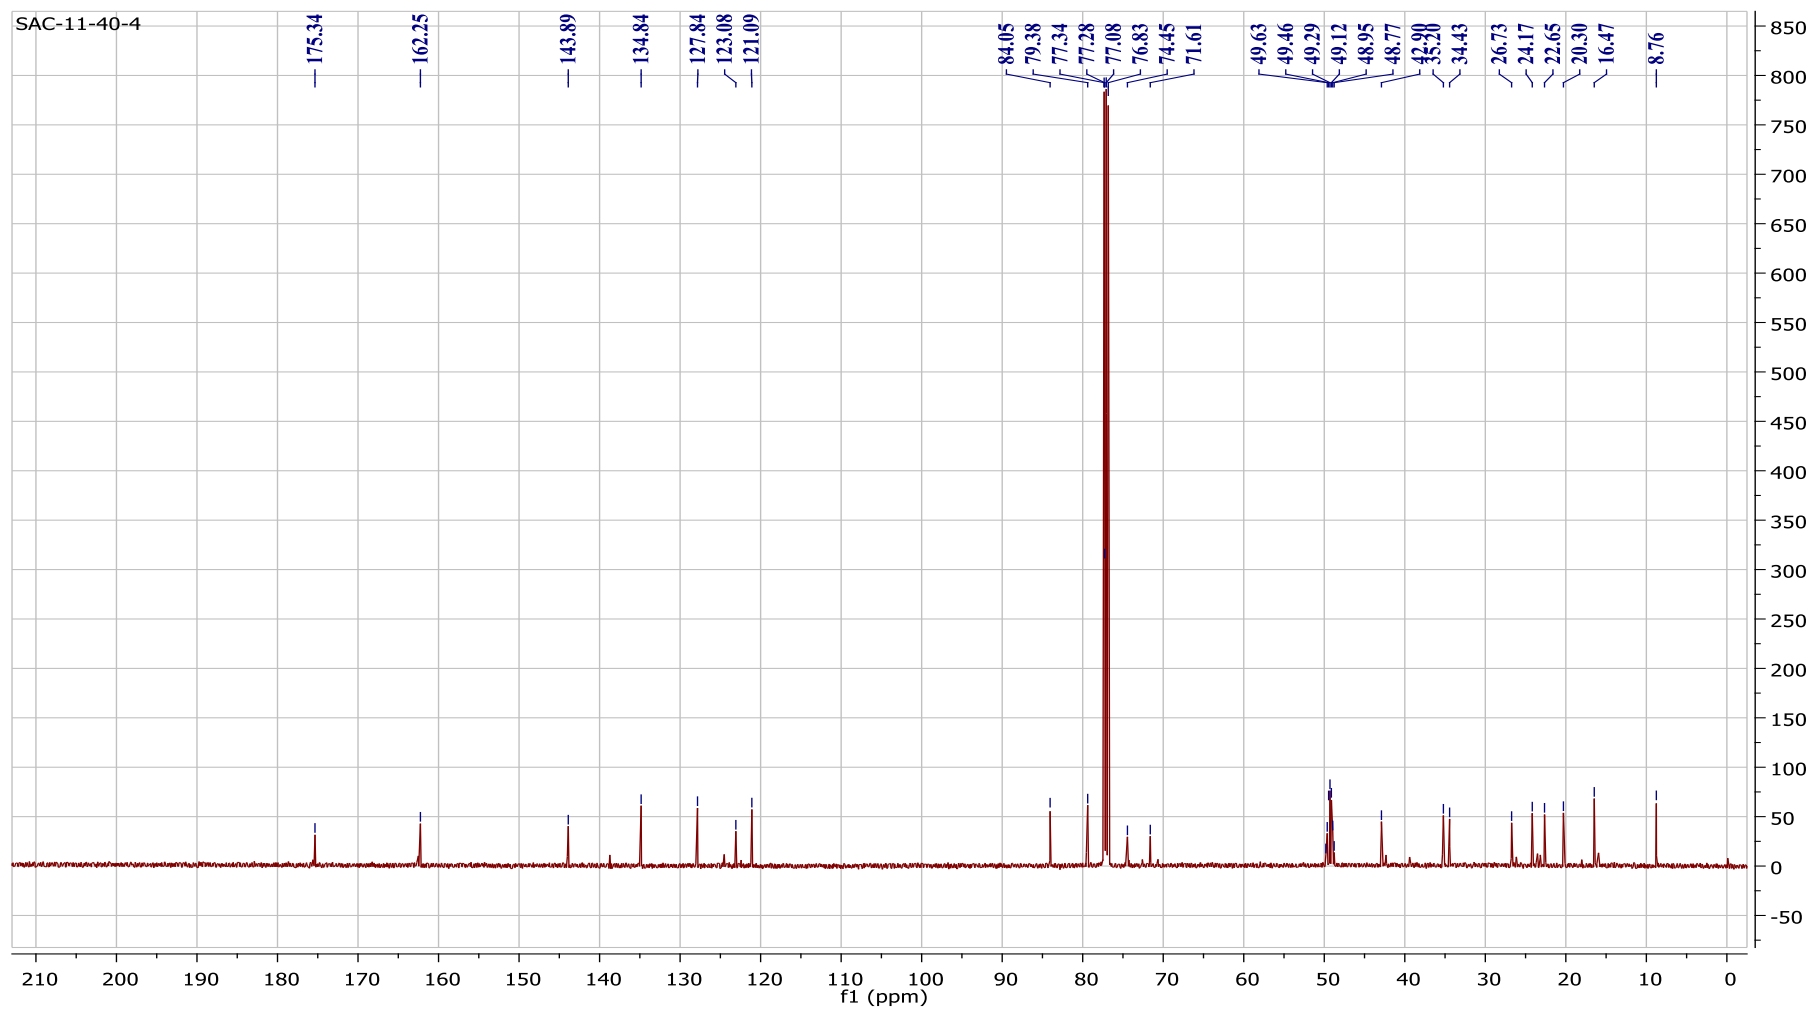

S5:  $^{13}\text{C}$  NMR of **1** (125 Hz,  $\text{CDCl}_3$ )



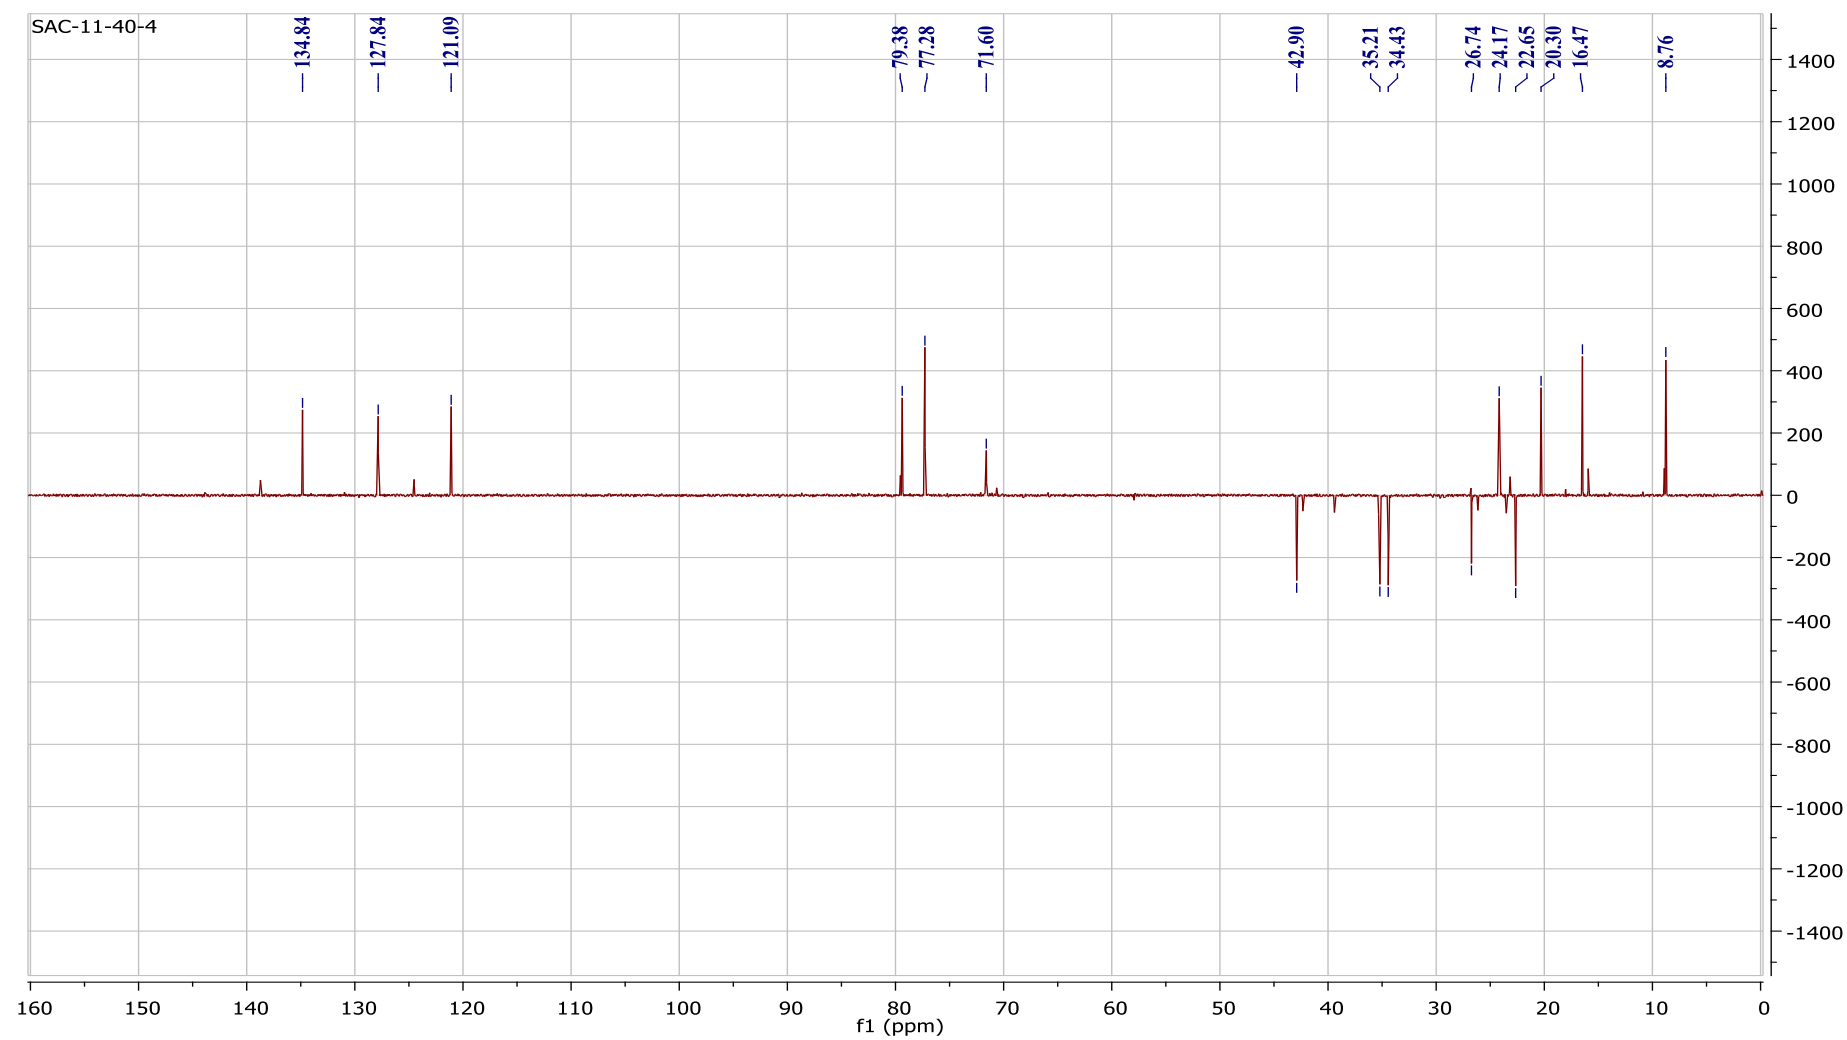

S6: DEPT of **1**

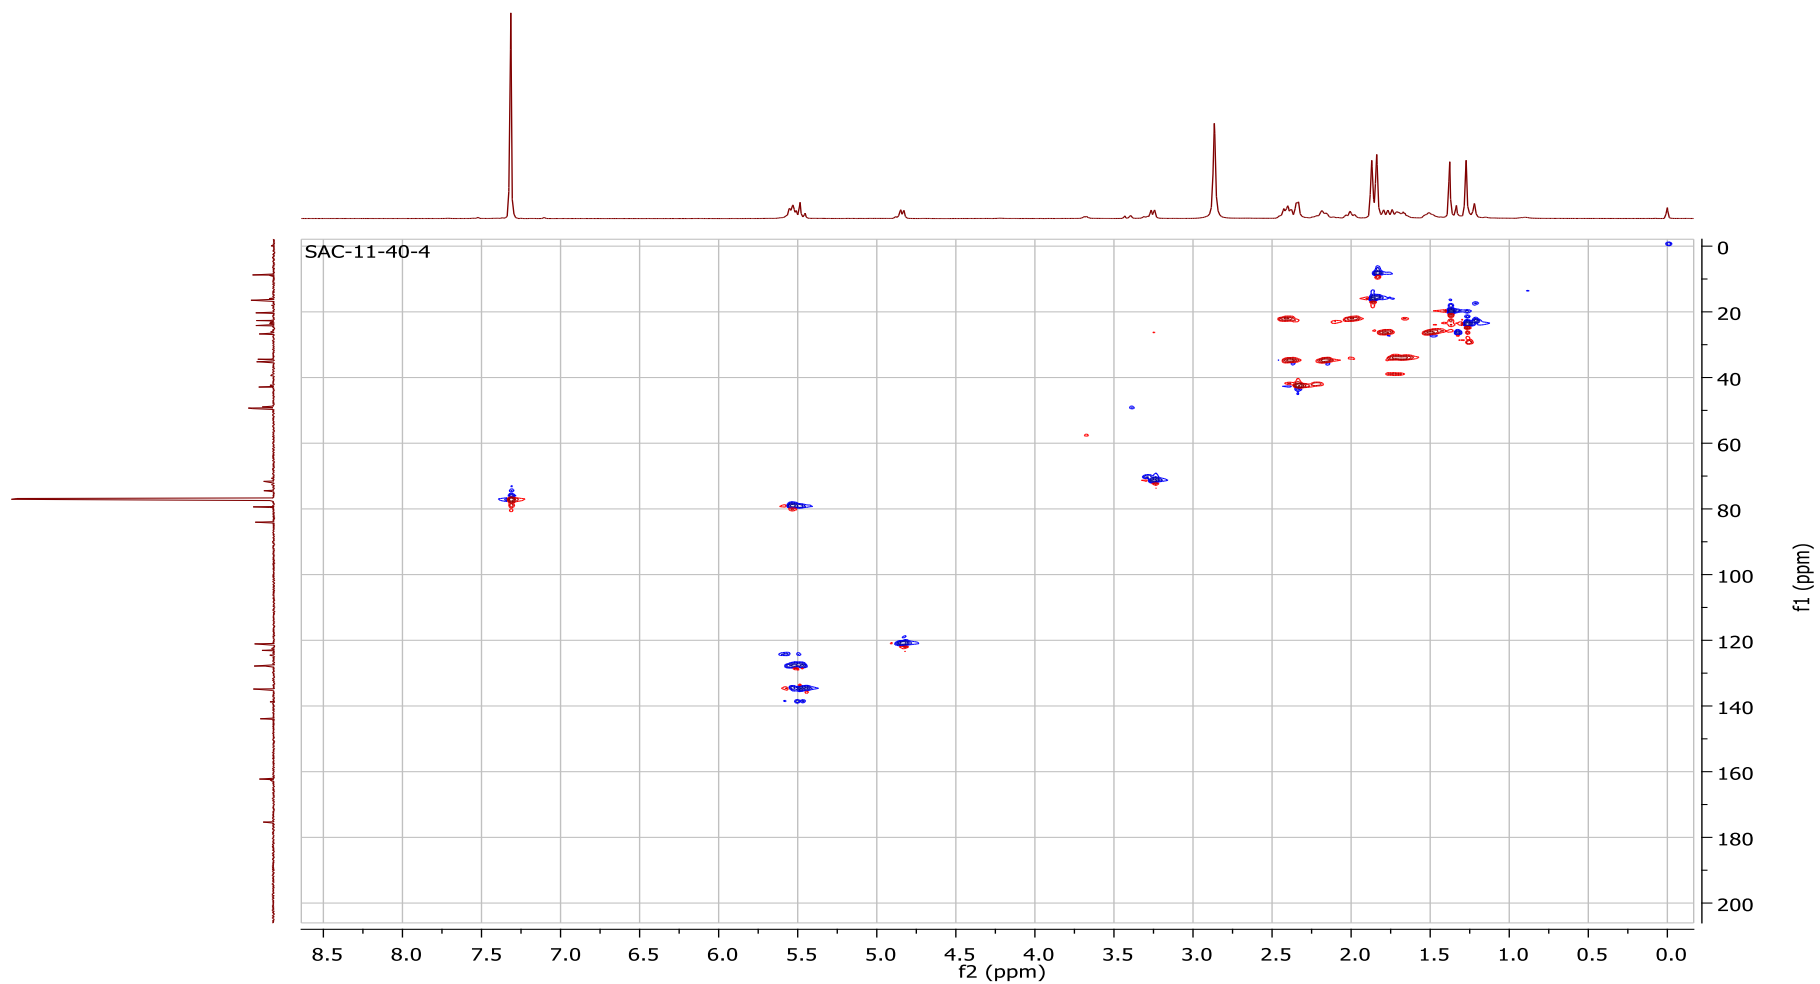

S7: HSQC of **1**

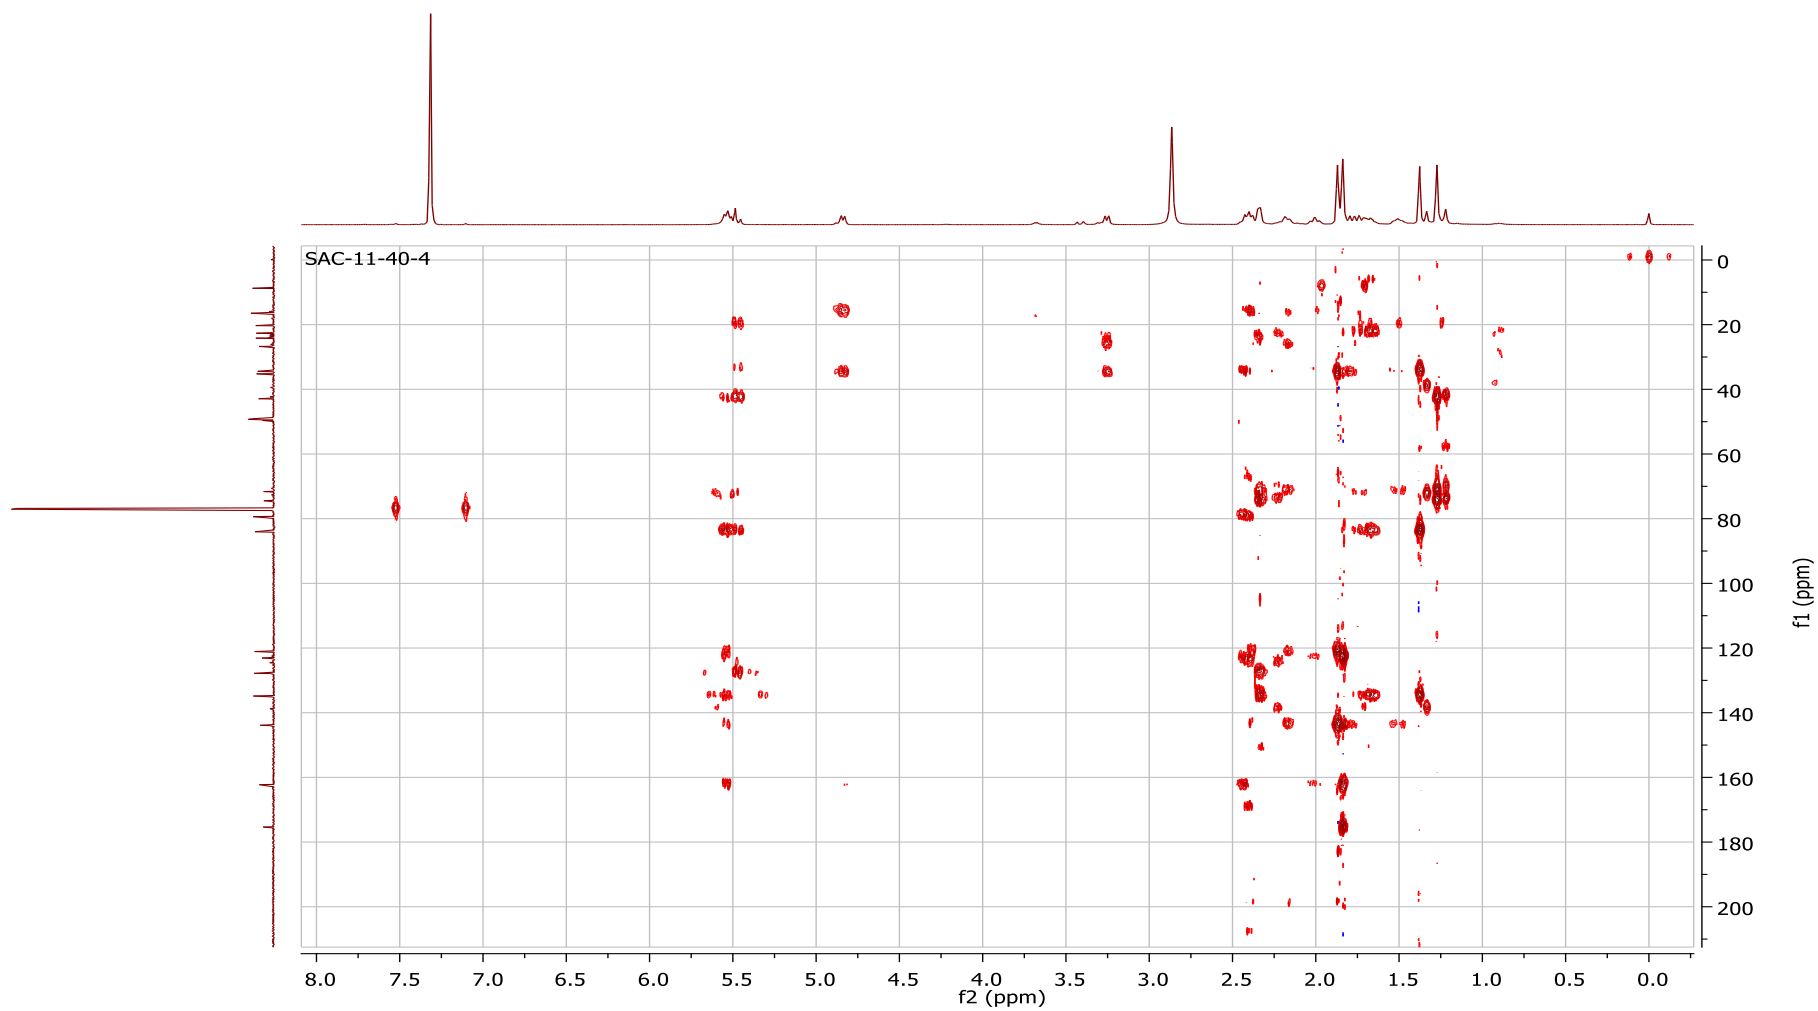

S8: HMBC of **1**

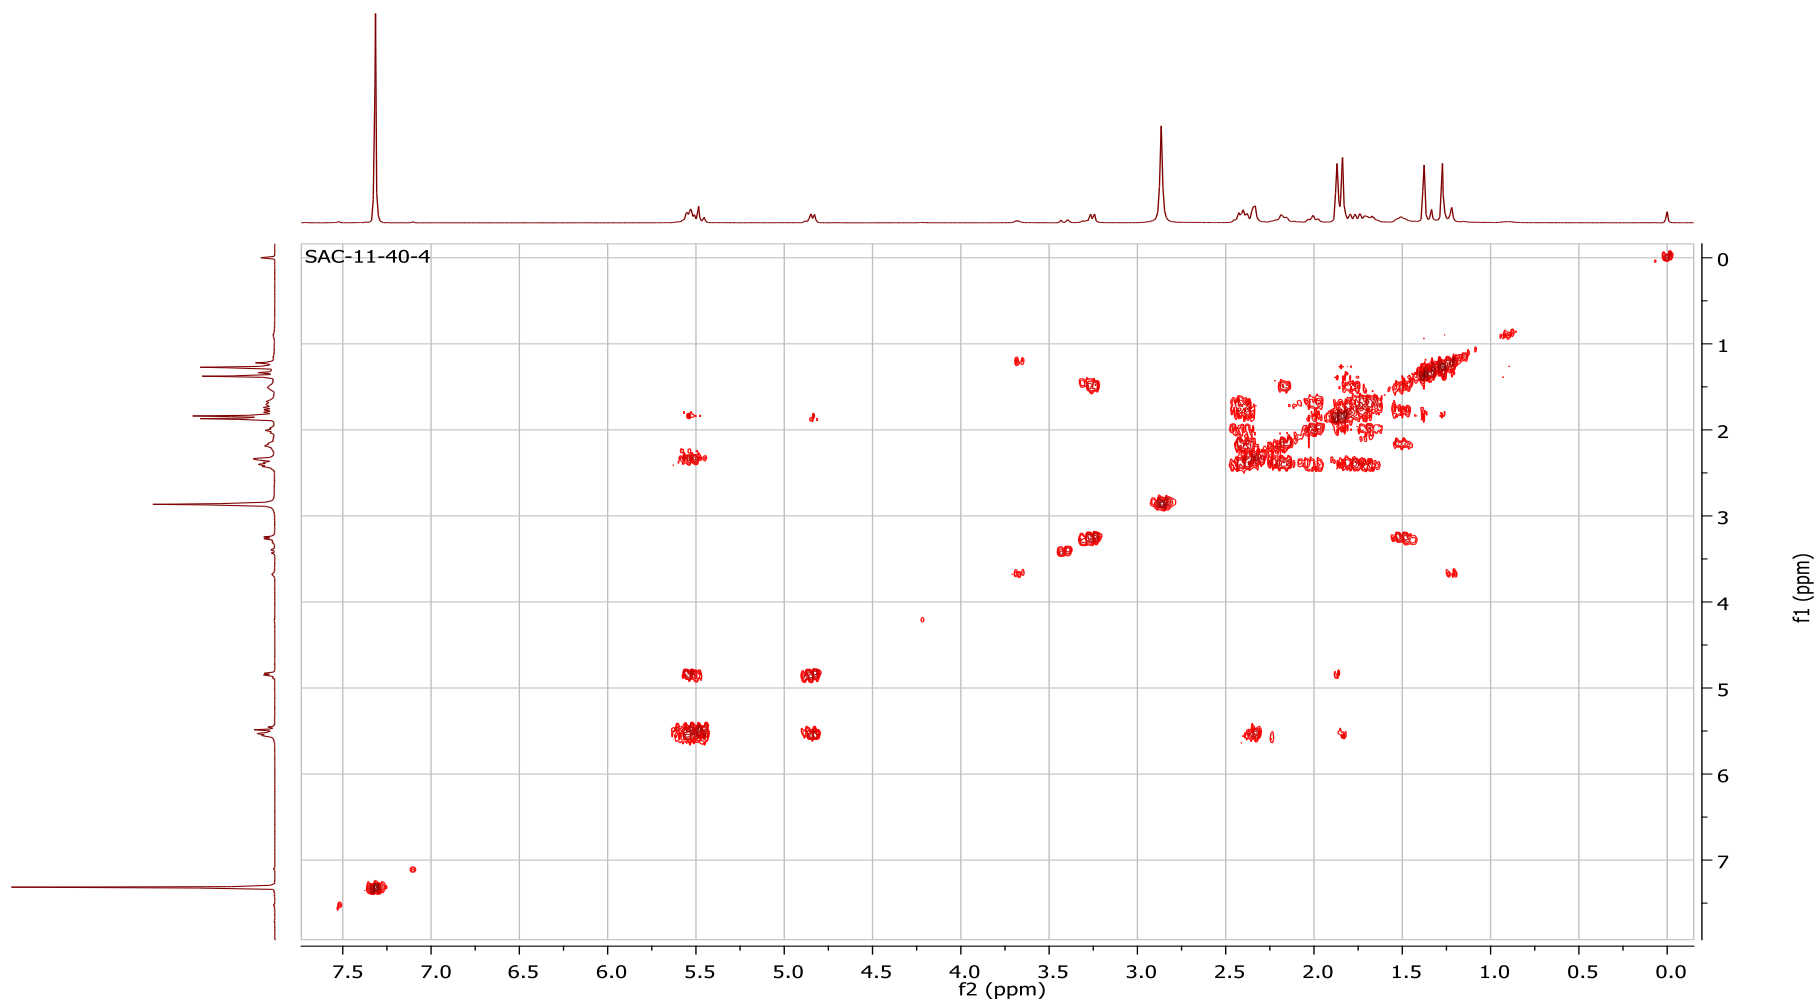

S9:  $^1\text{H}$   $^1\text{H}$  COSY of 1

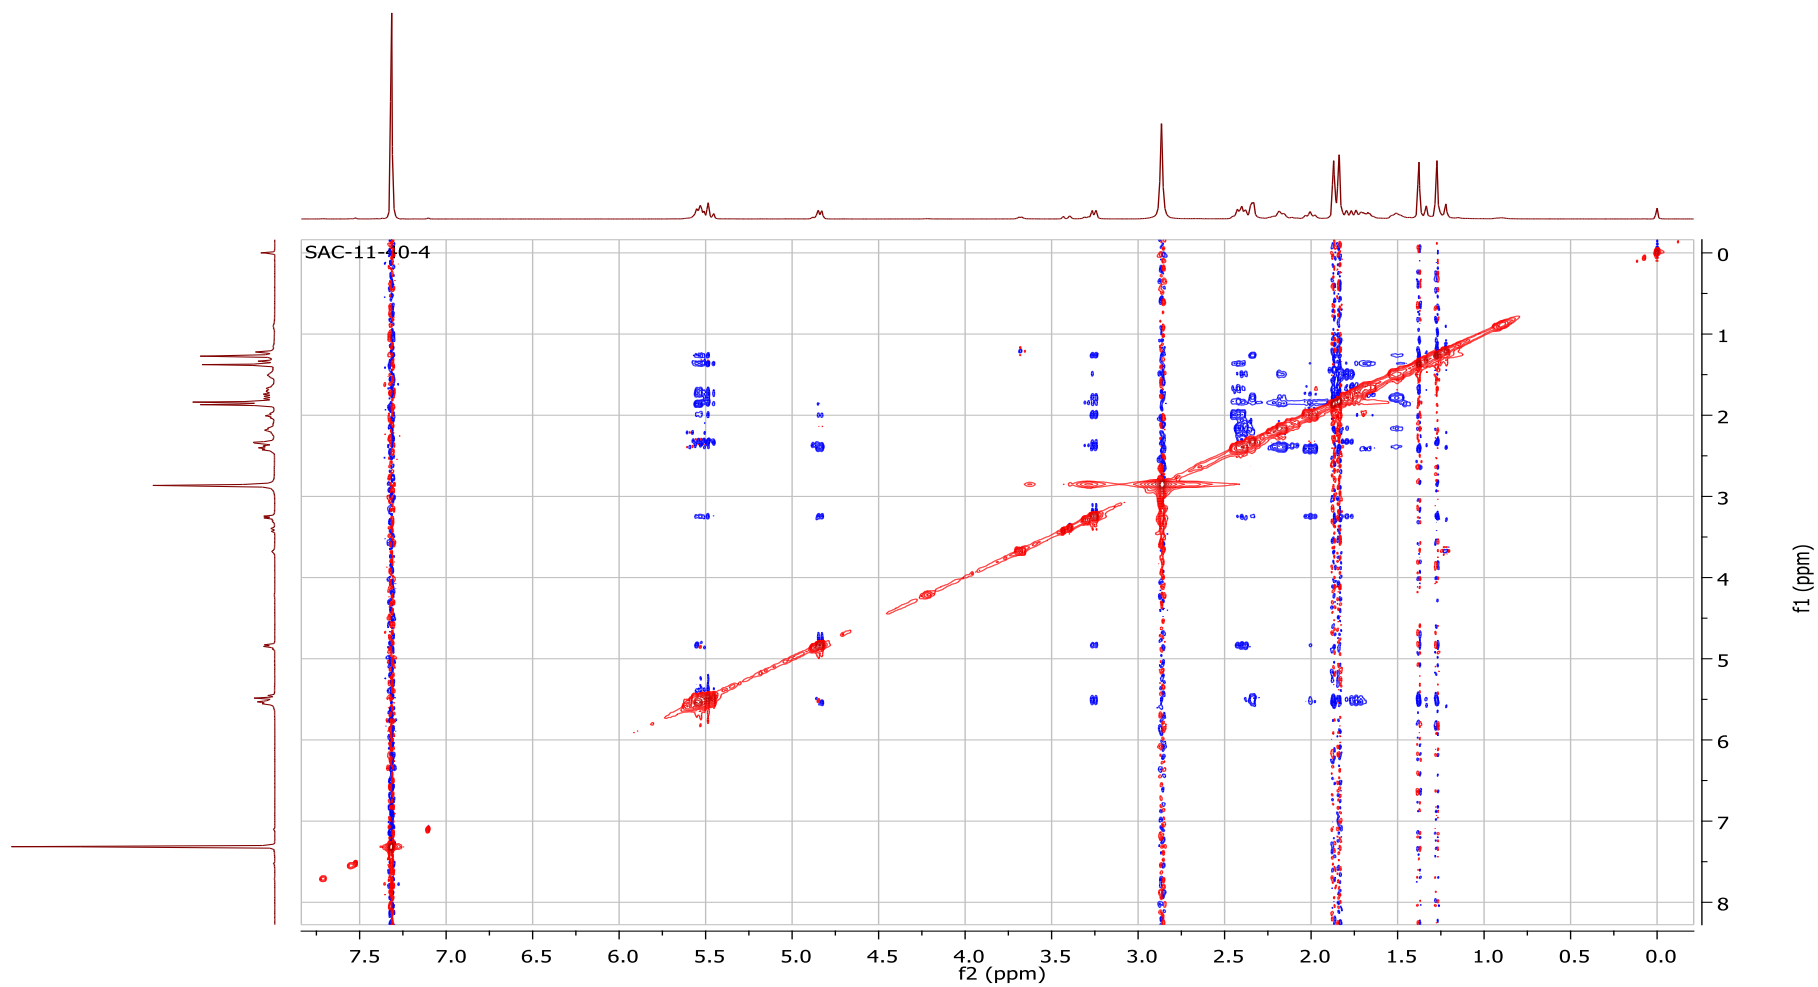

S10: NOESY of **1**

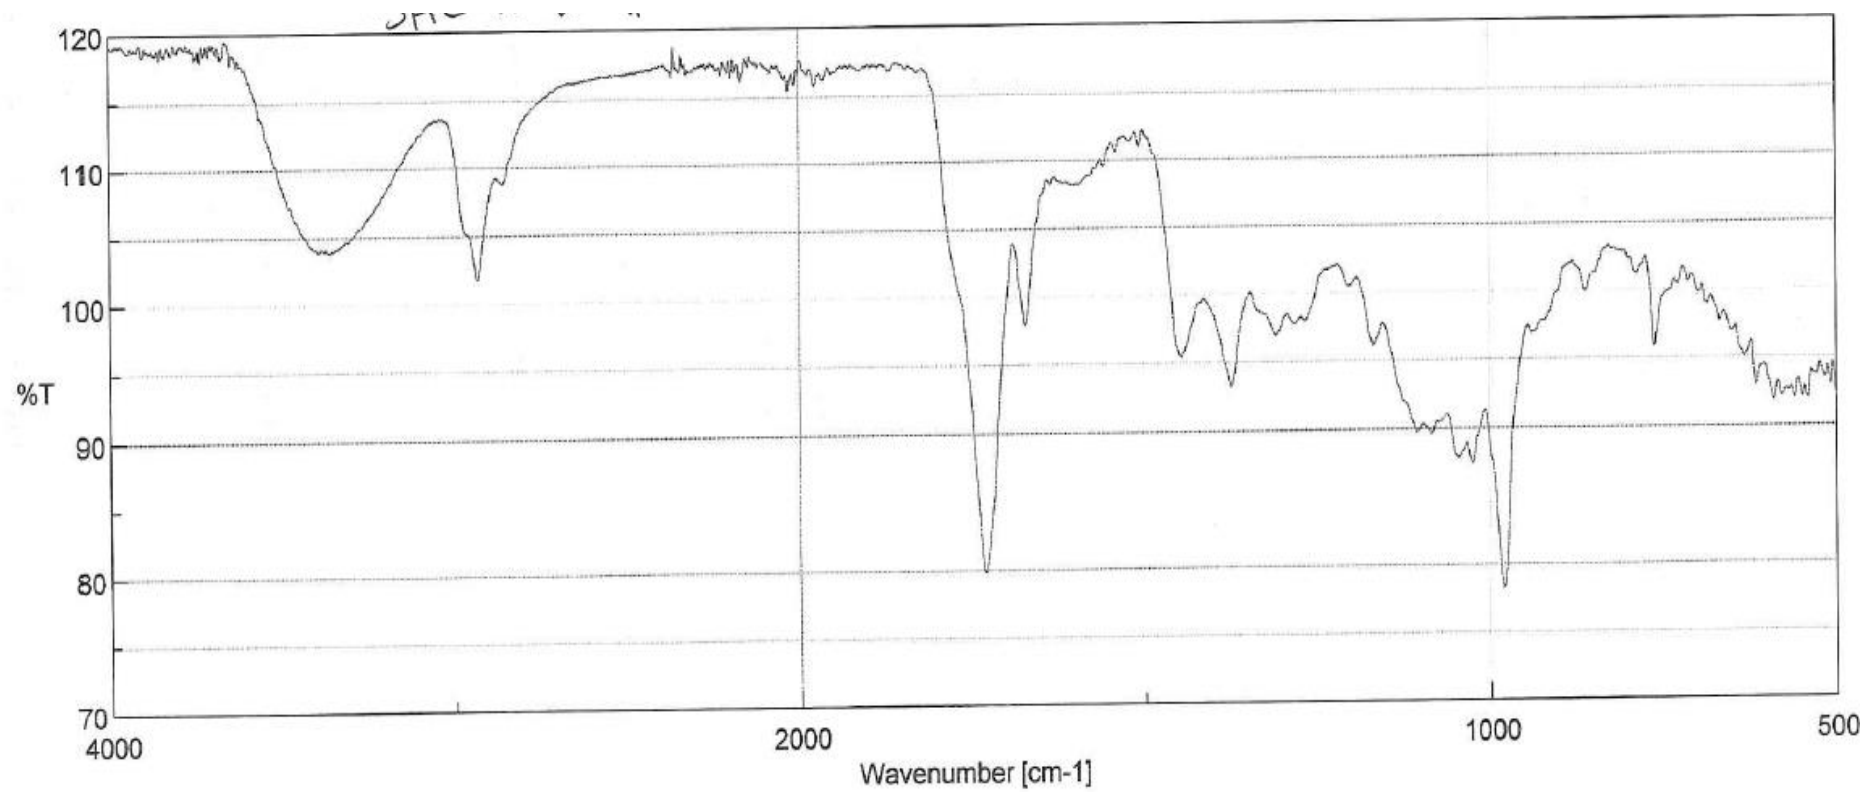

S11: FTIR of 2

Inlet : Direct      Ion Mode : CI+  
Spectrum Type : Normal Ion [MF-Linear]  
RT : 1.78 min      Scan# : 66  
BP : m/z 127      Int. : 304.82 (3196288)  
Output m/z range : 35 to 500      Cut Level : 0.00 %

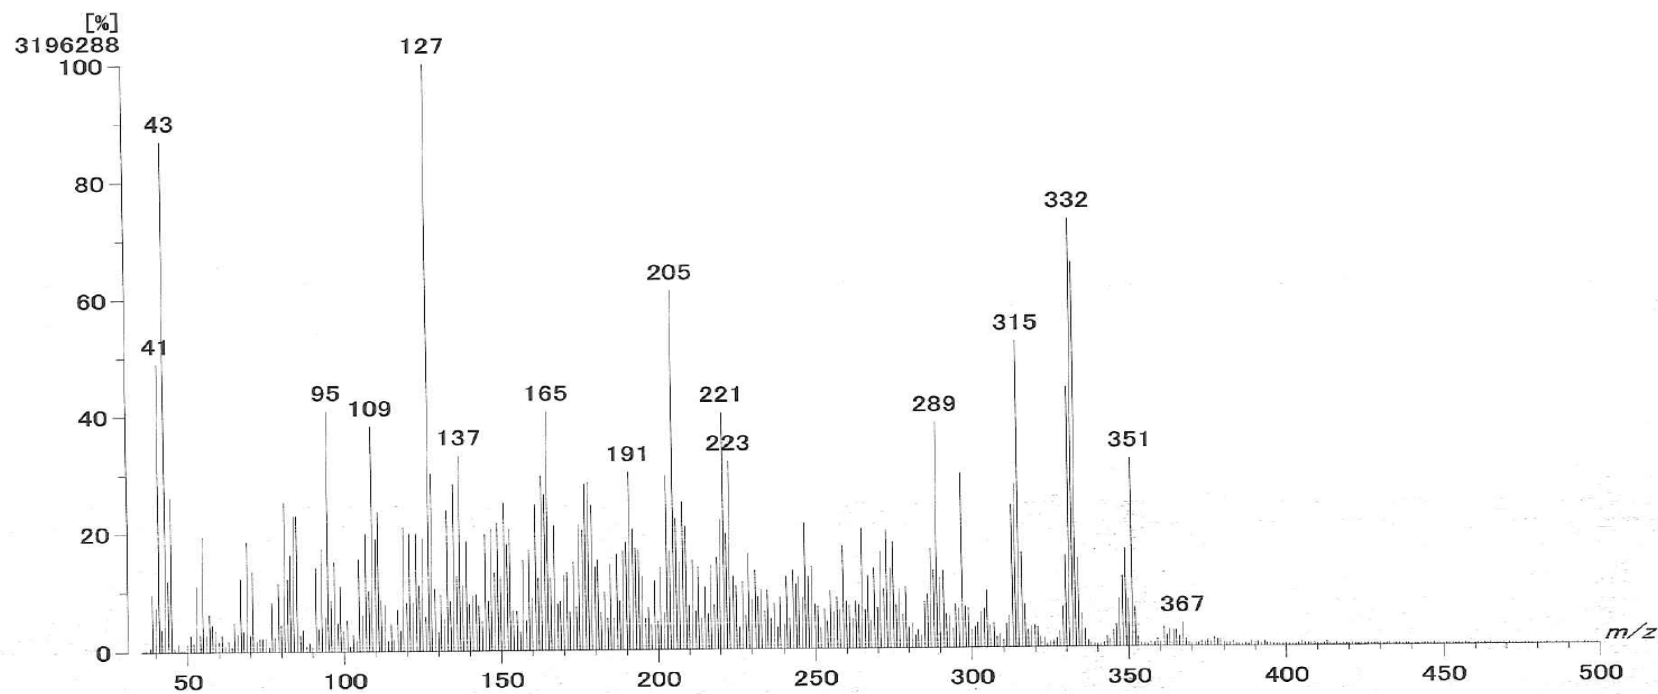

S12: LRCIMS of 2

Note : MStation

Inlet : Direct Ion Mode : CI+

RT : 1.92 min Scan# : 49

Elements : C 150/0, H 250/0, O 50/0

Mass Tolerance : 5mmu

Unsaturation (U.S.) : 0.0 – 15.0

|   | Observed m/z | Int% | Err [ppm / mmu] | U.S. Composition |
|---|--------------|------|-----------------|------------------|
| 1 | 367.2122     | 4.78 | +0.4 / +0.1     | 5.5 C20 H31 O6   |

S13: HRCIMS of 2



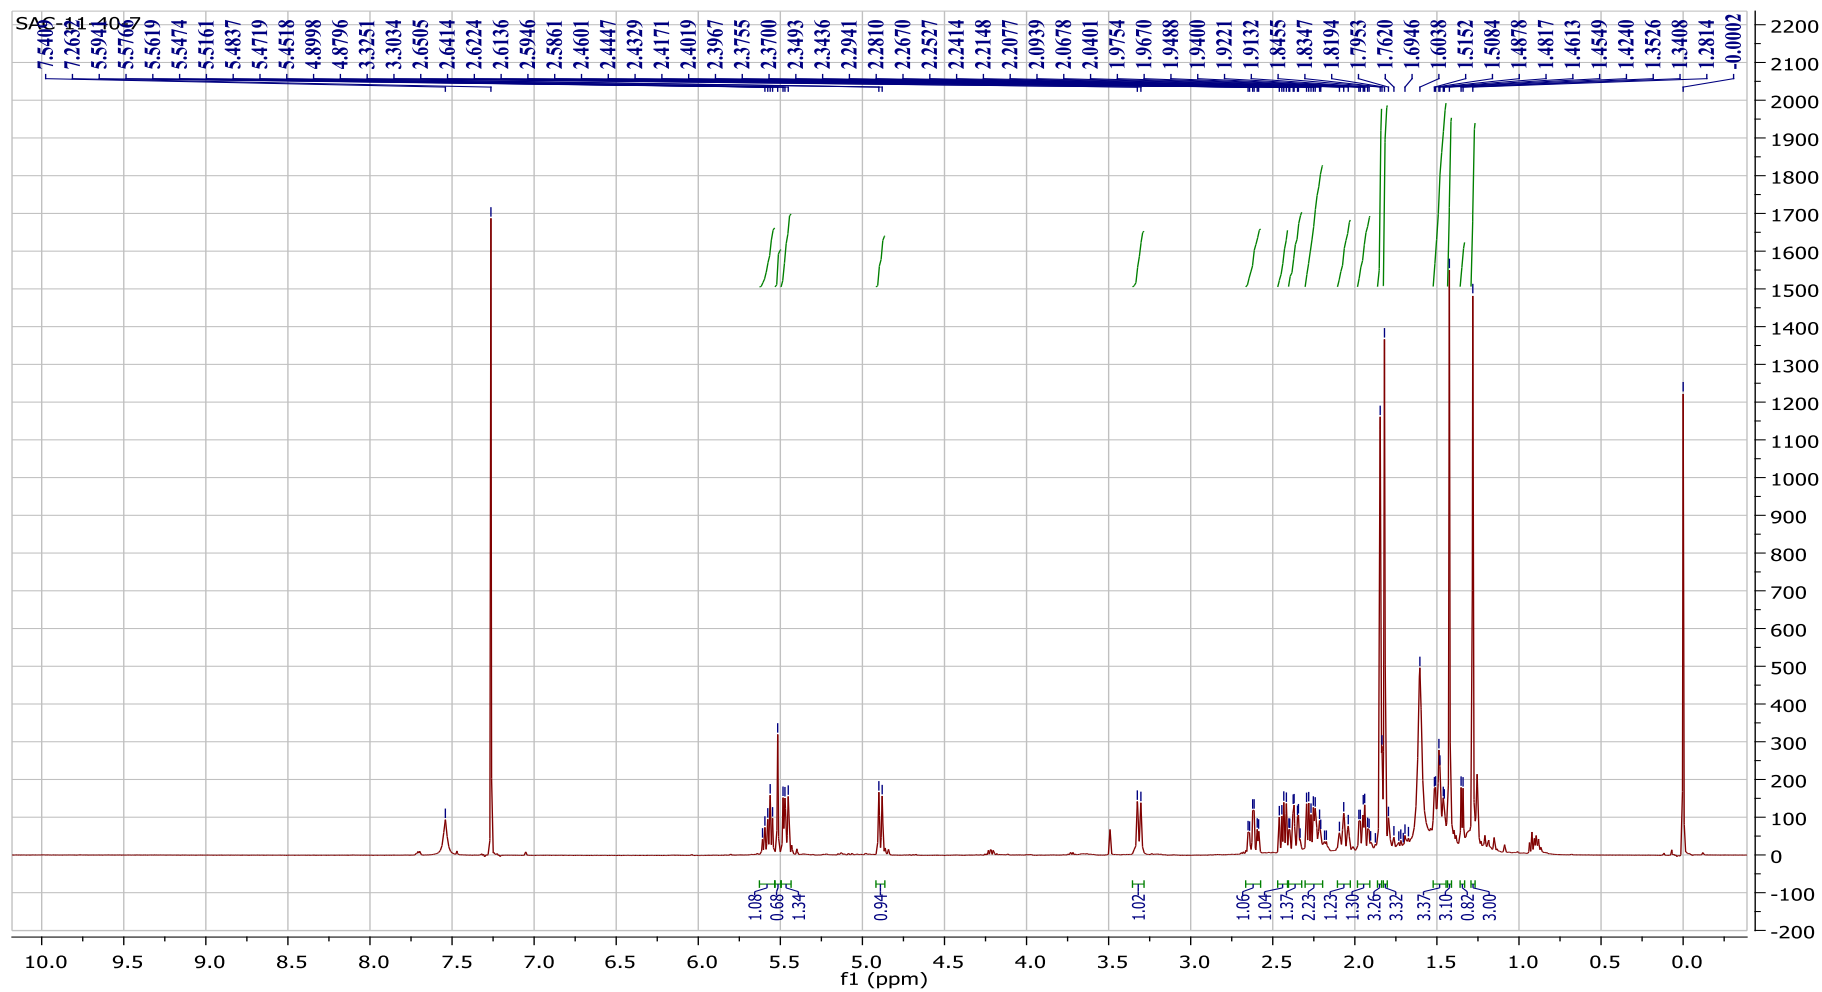

S14:  $^1\text{H}$  NMR of **2**

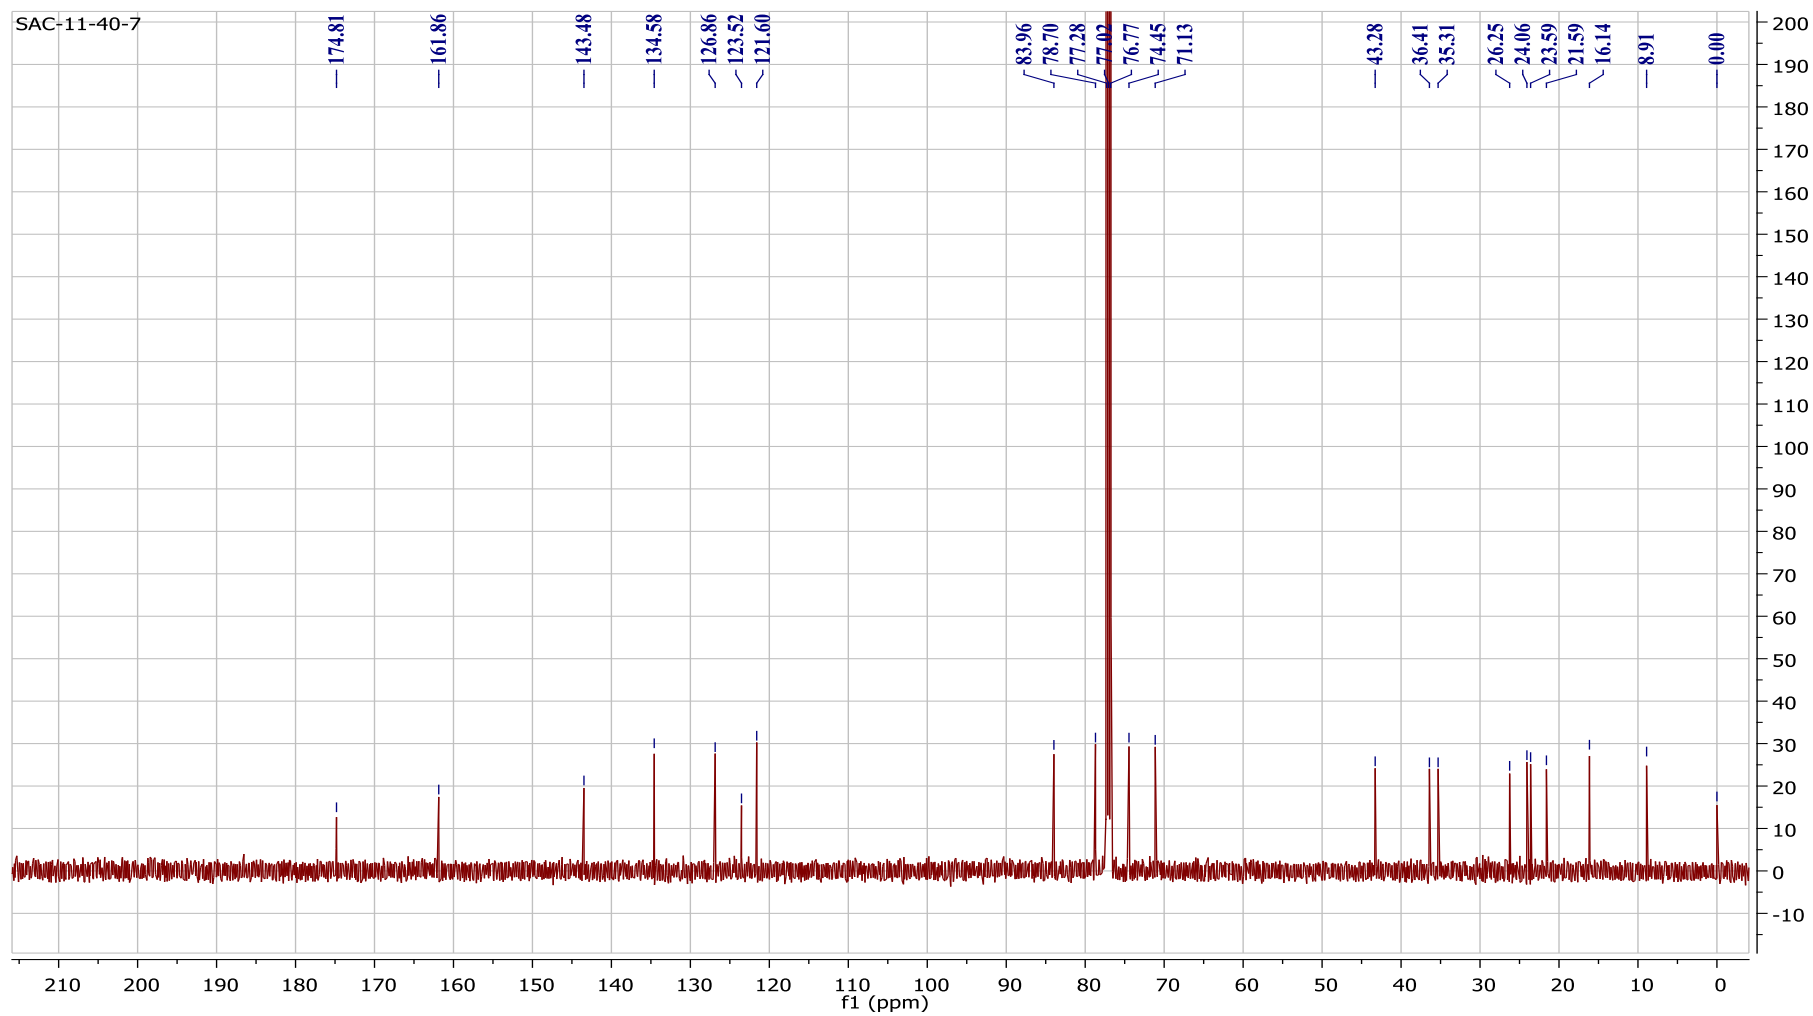

S15:  $^{13}\text{C}$  NMR of **2**

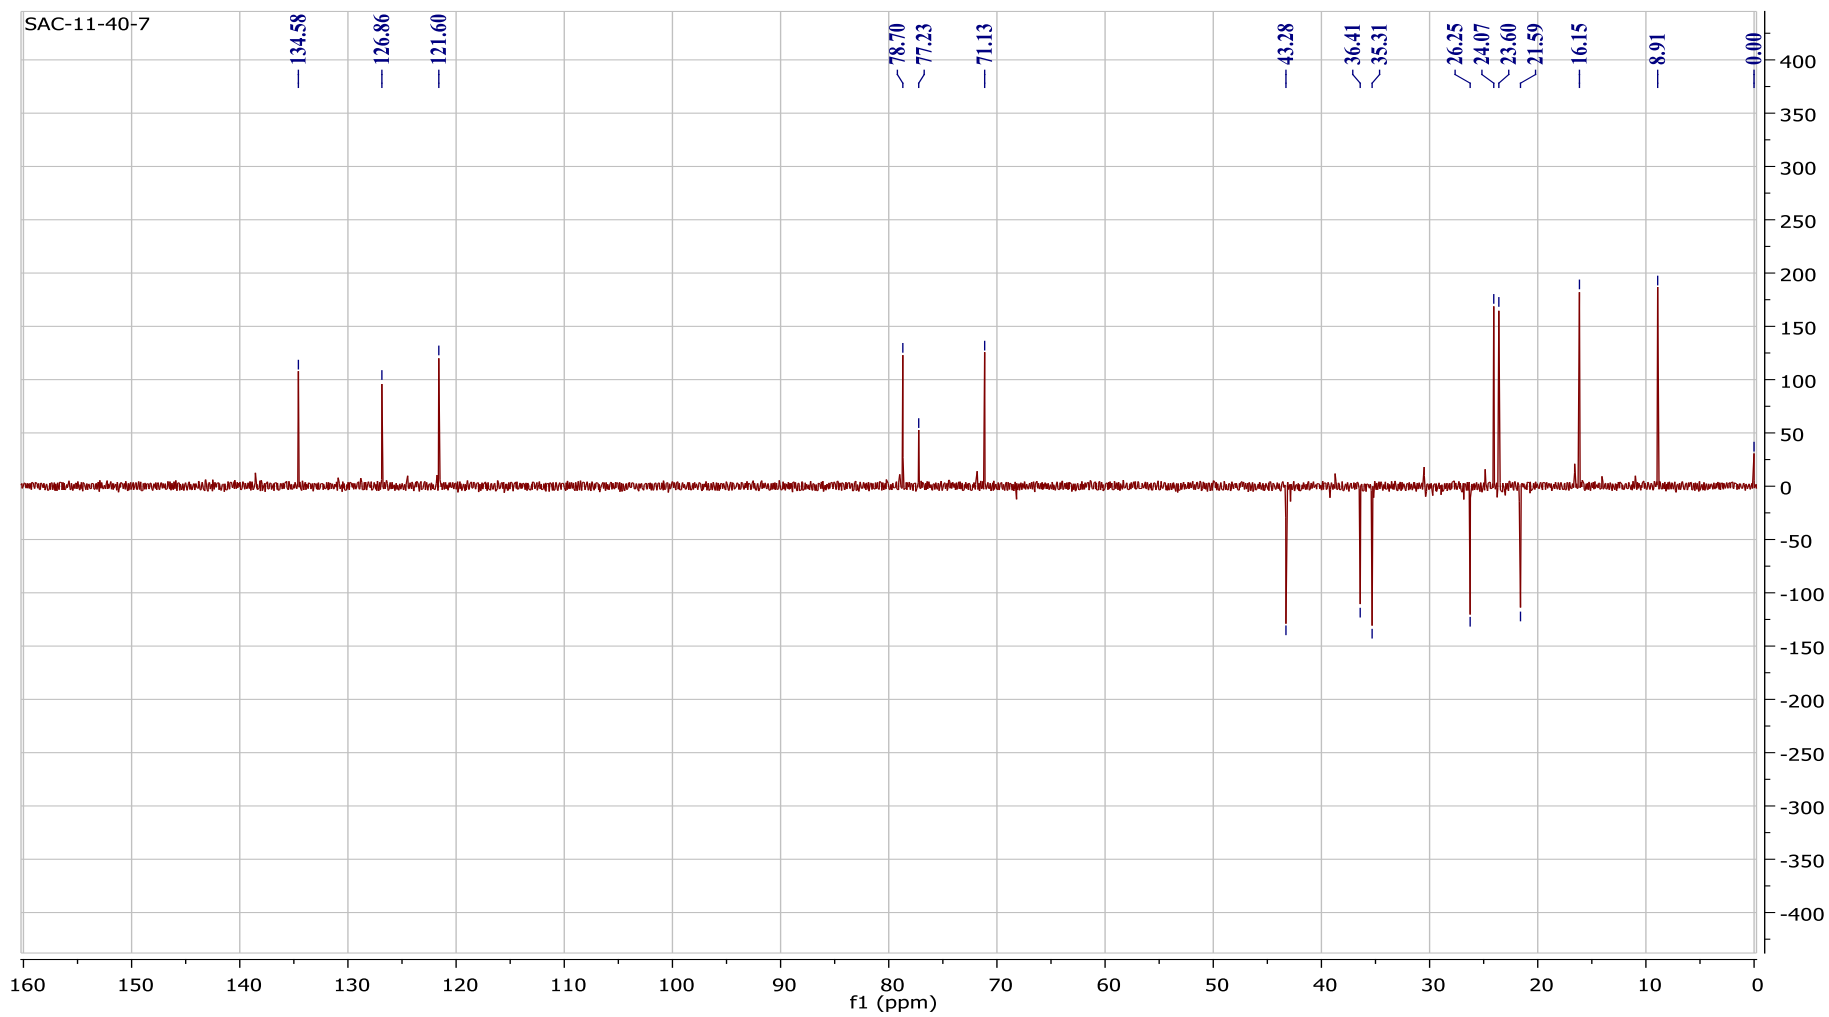

S16: DEPT of 2

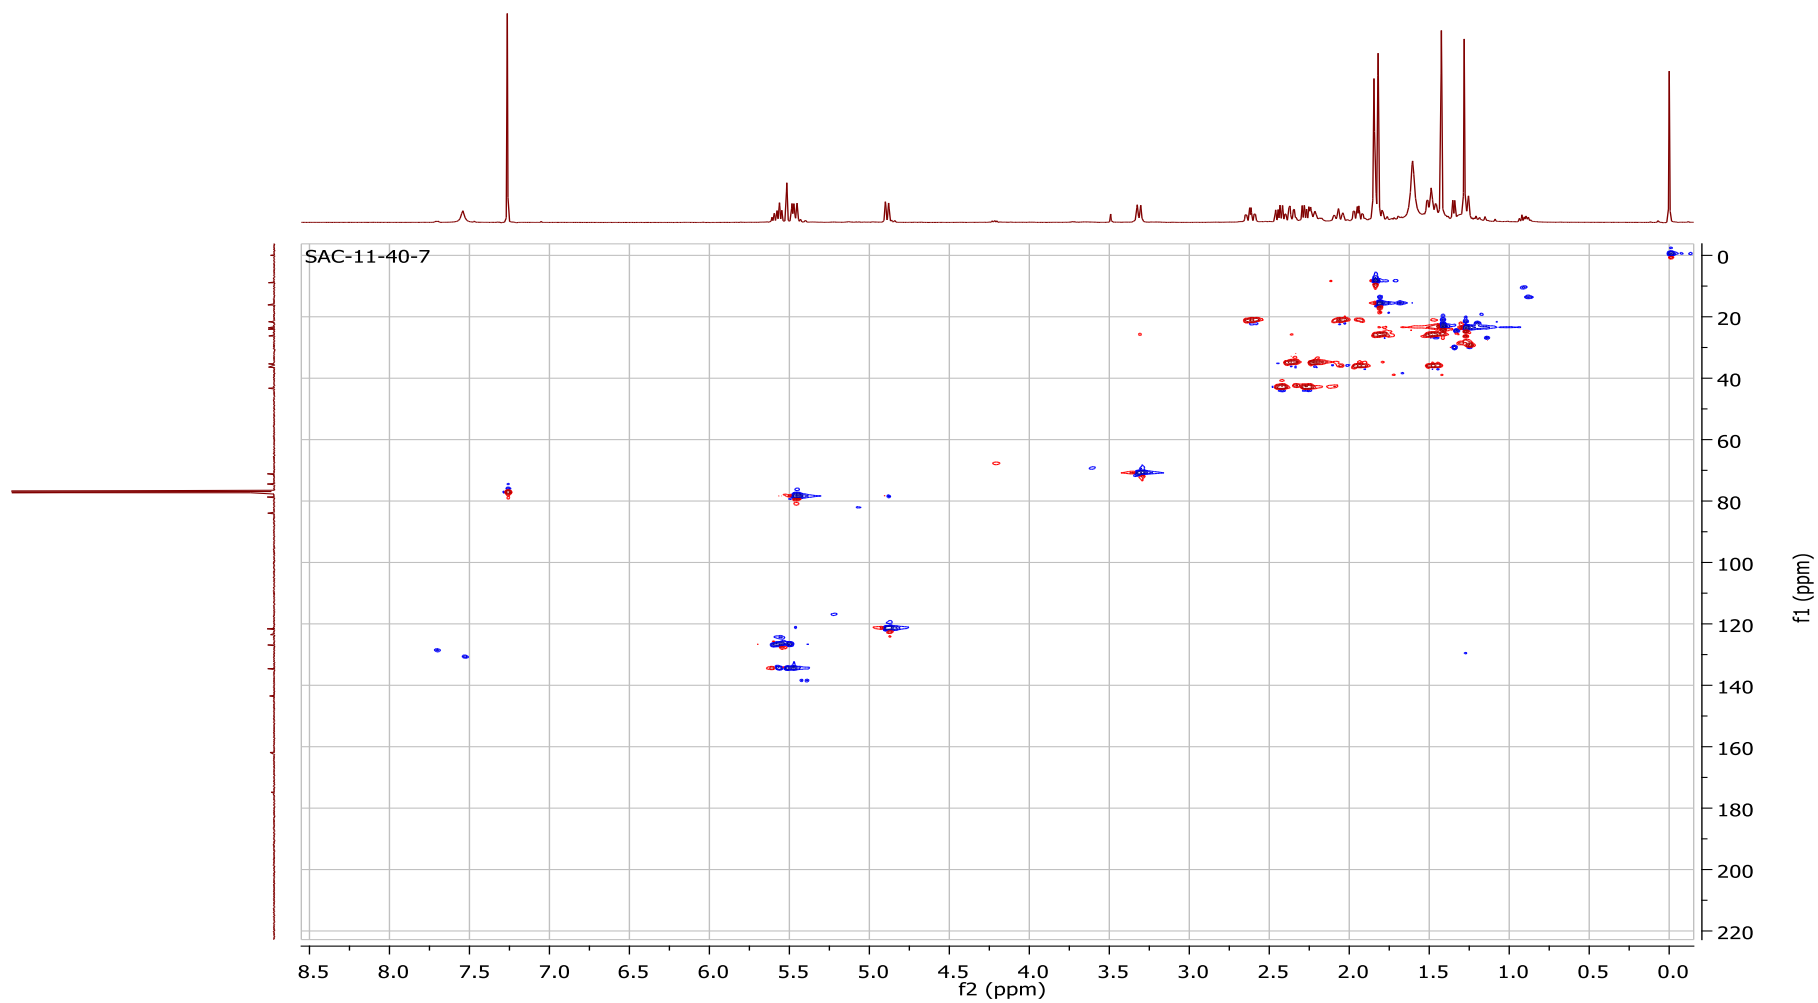

S17: HSQC of 2

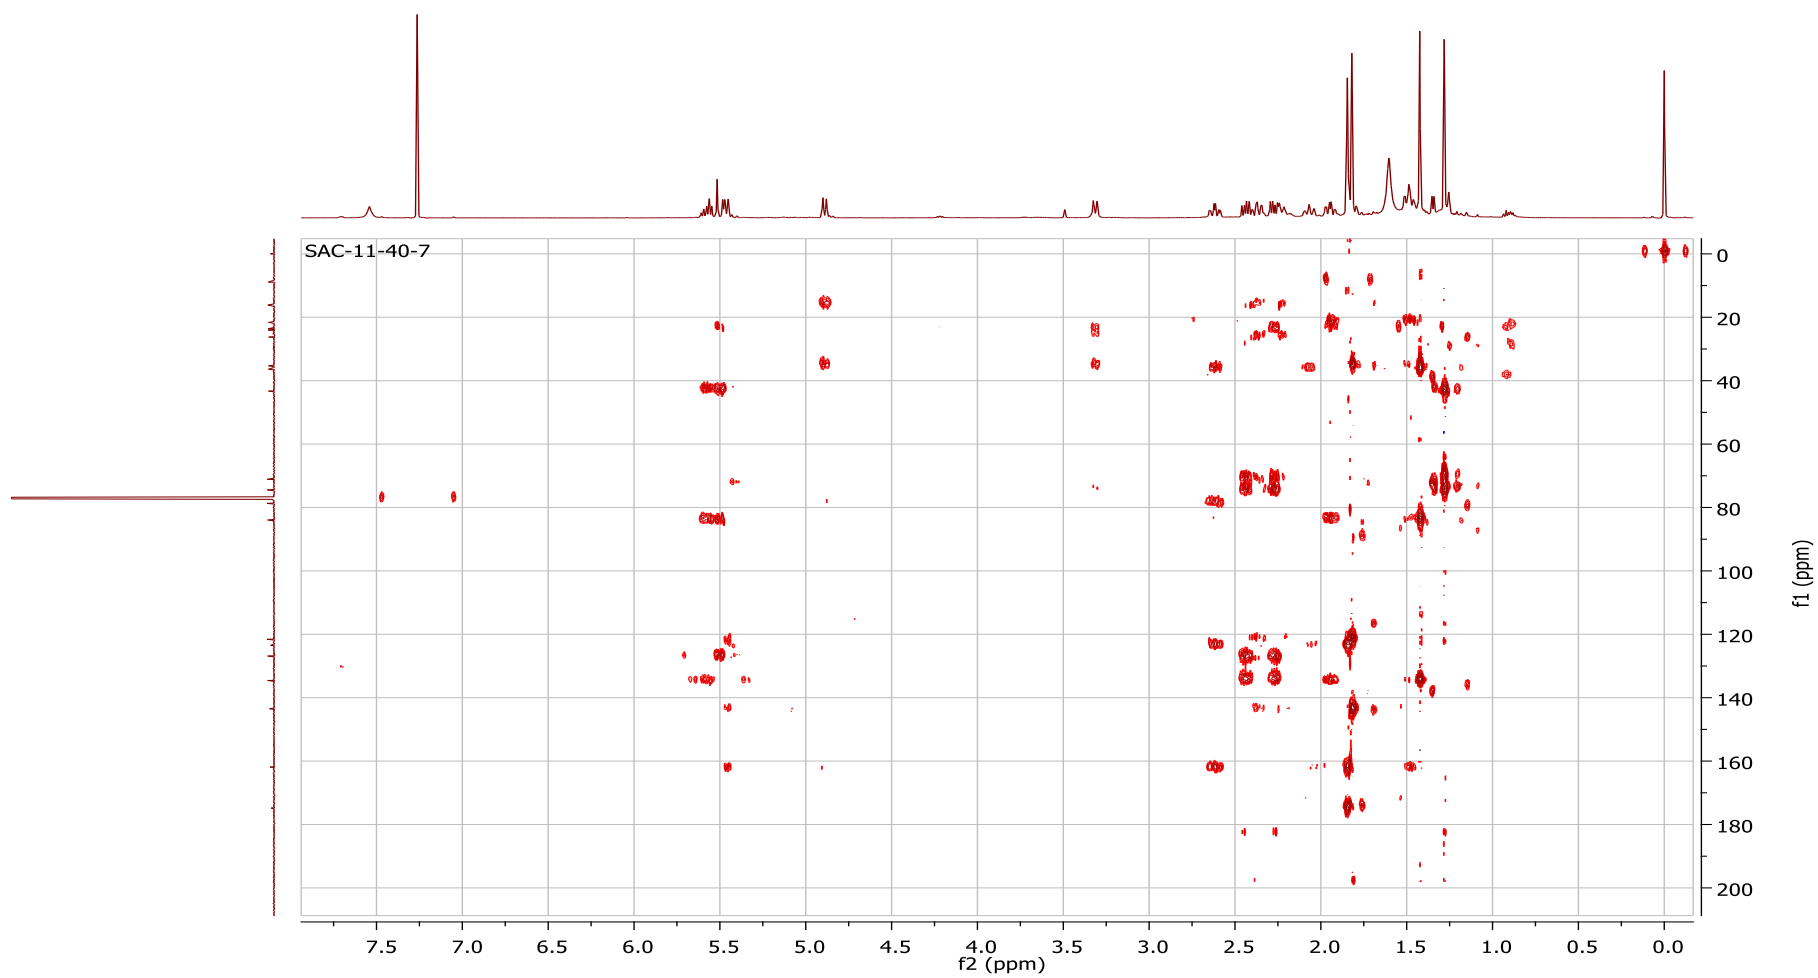

S18: HMBC of **2**

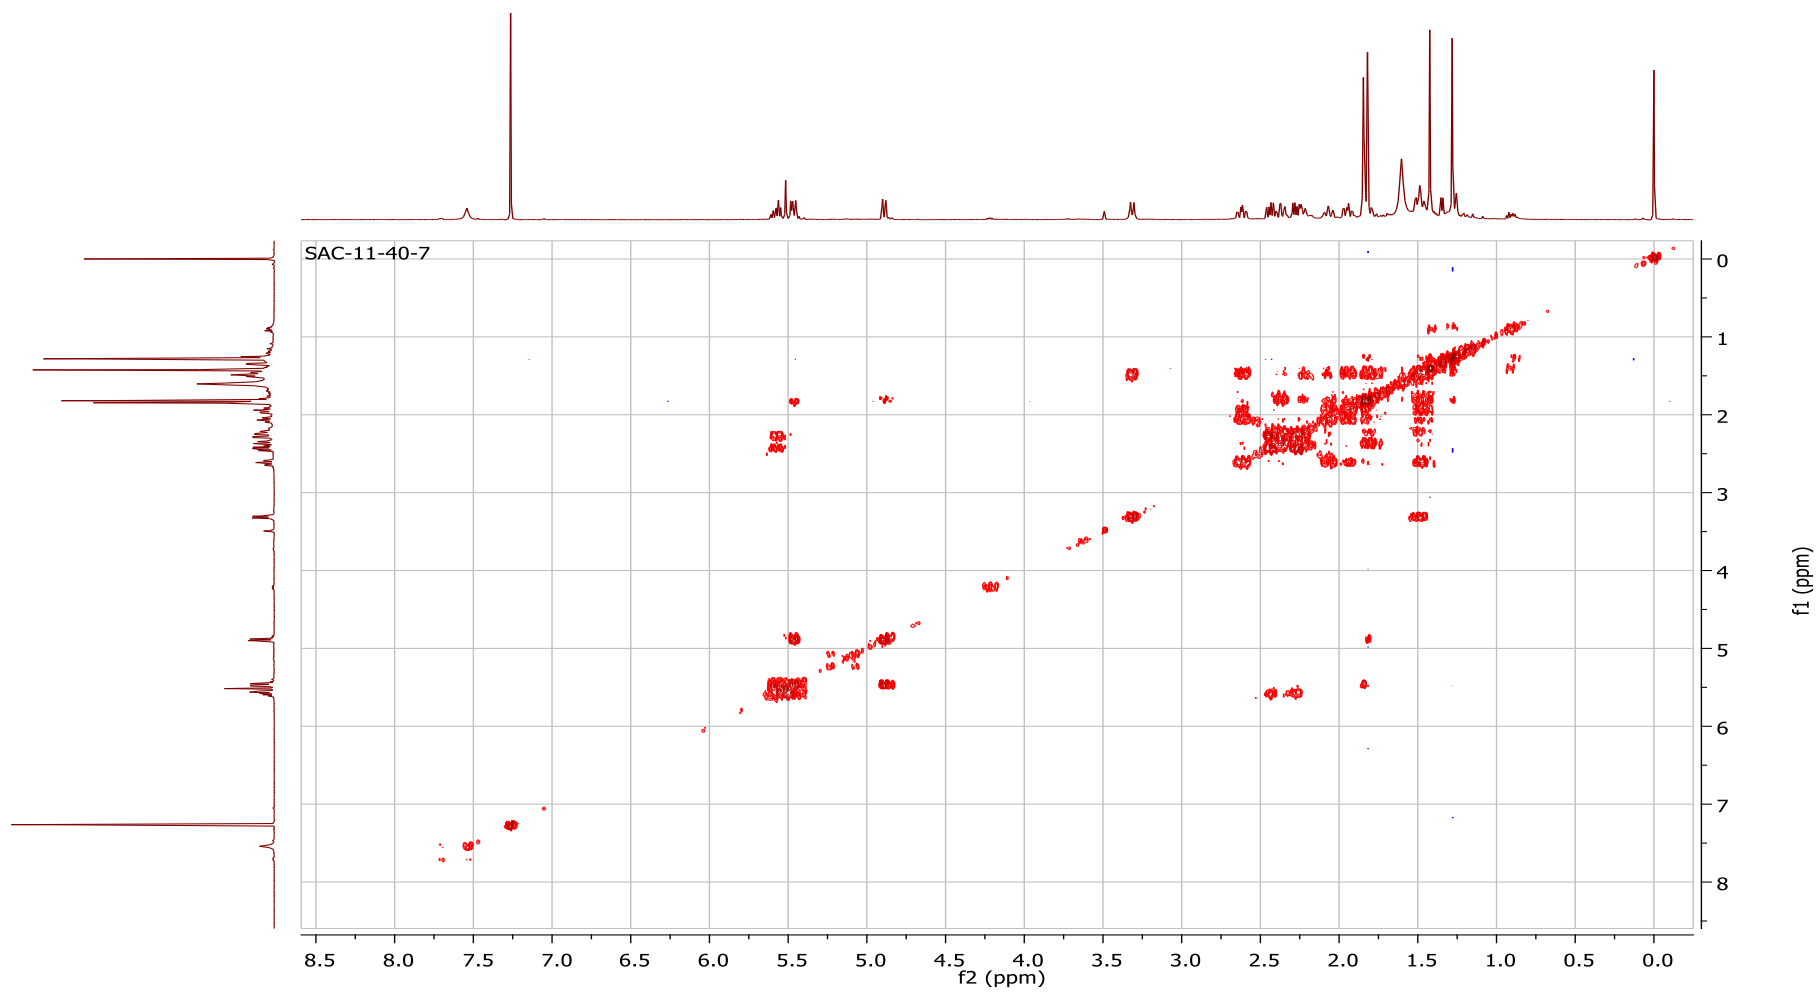

S19:  $^1\text{H}$   $^1\text{H}$  COSY of **2**

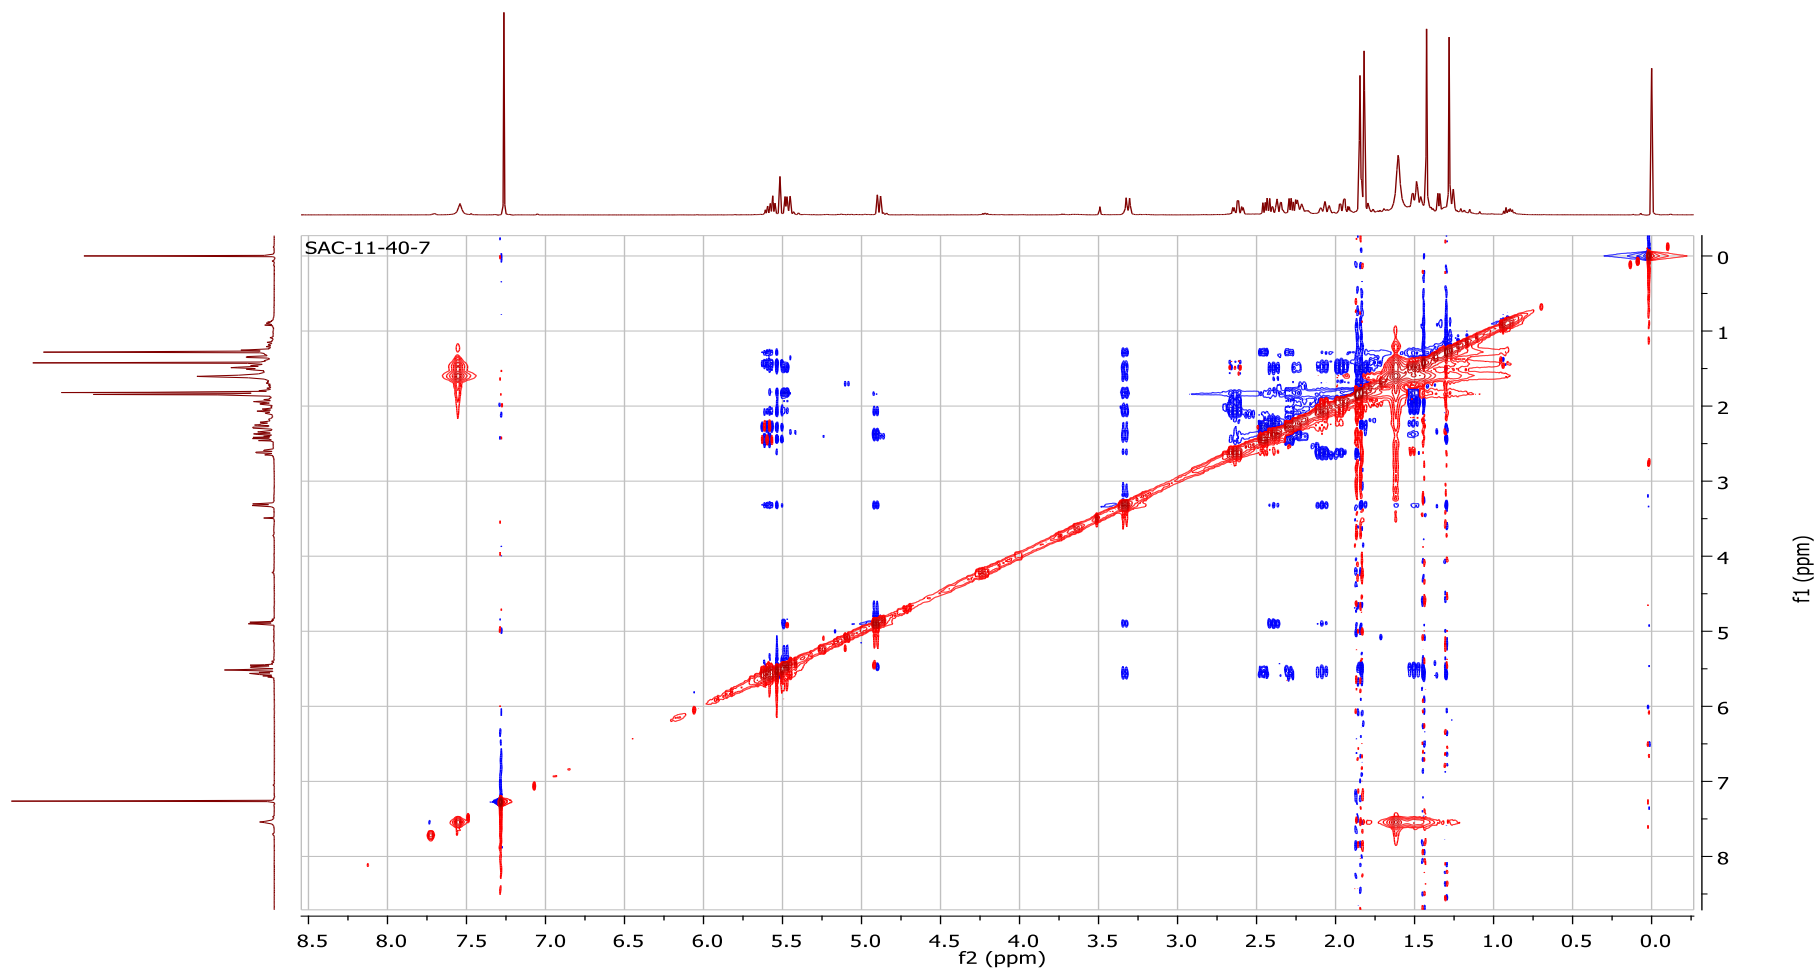

S20: NOESY of 2

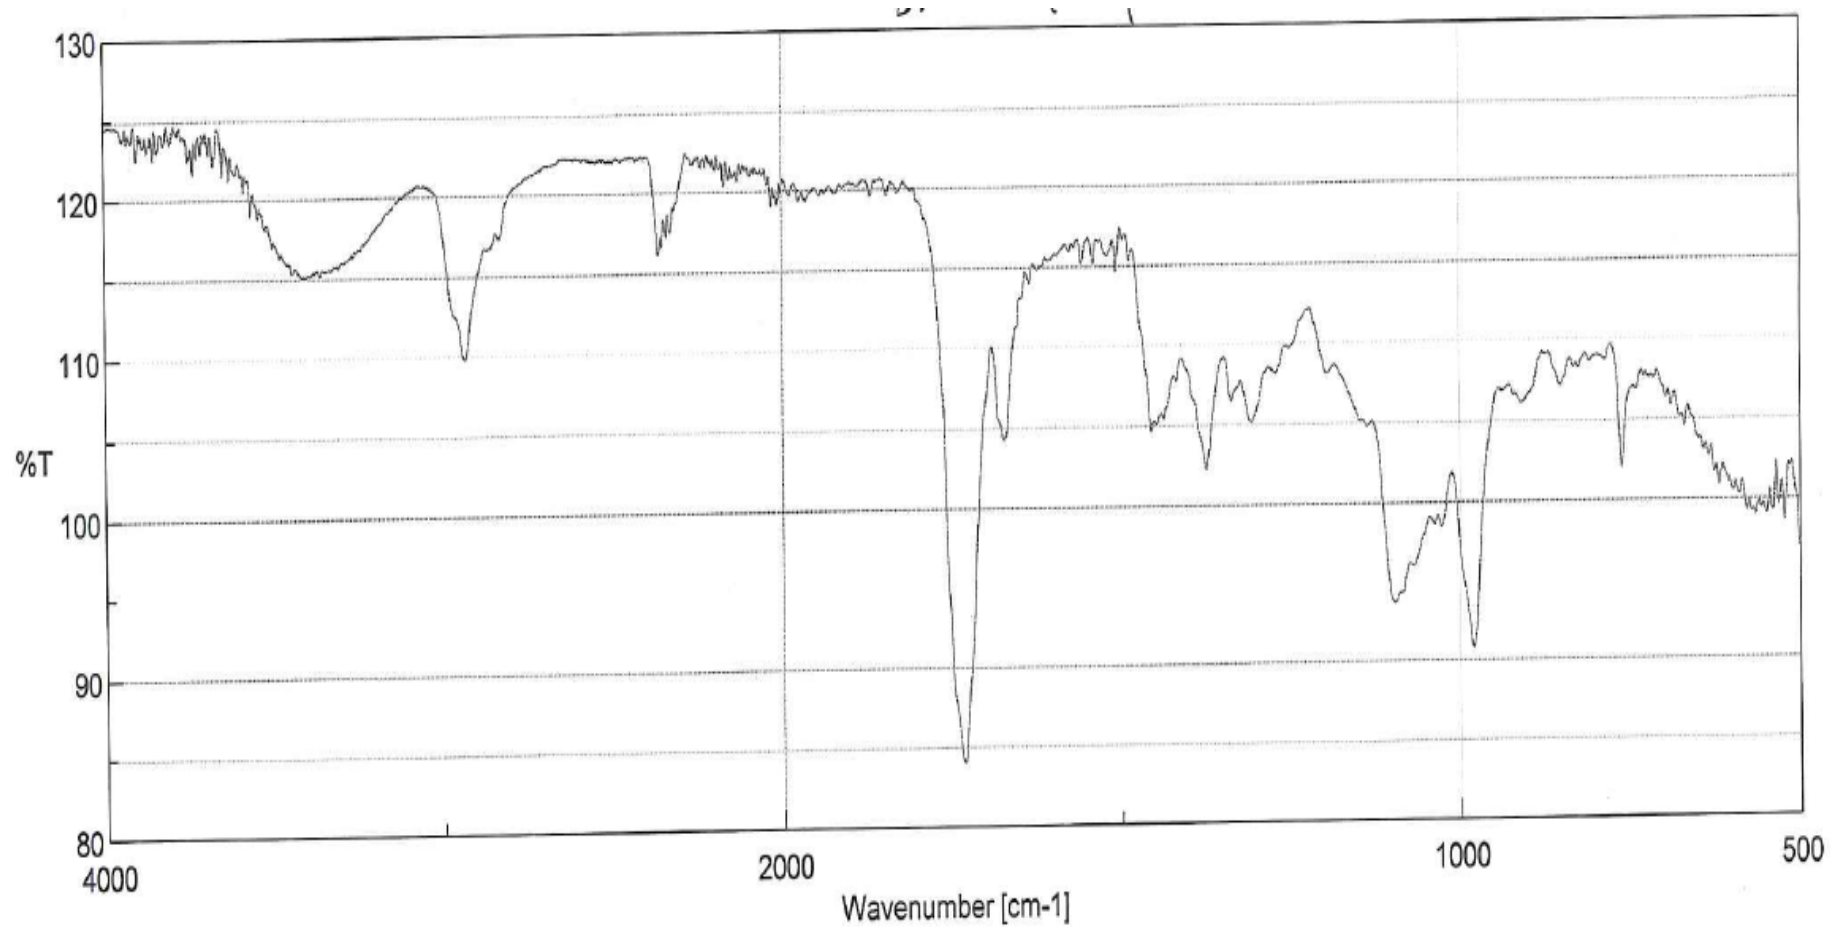

S21: LRCIMS of 3



Inlet : Direct     Ion Mode : EI+  
Spectrum Type : Normal Ion [MF-Linear]  
RT : 1.07 min     Scan# : 33  
BP : m/z 43     Int. : 1559.06 (16347904)  
Output m/z range : 35 to 500     Cut Level : 0.00 %

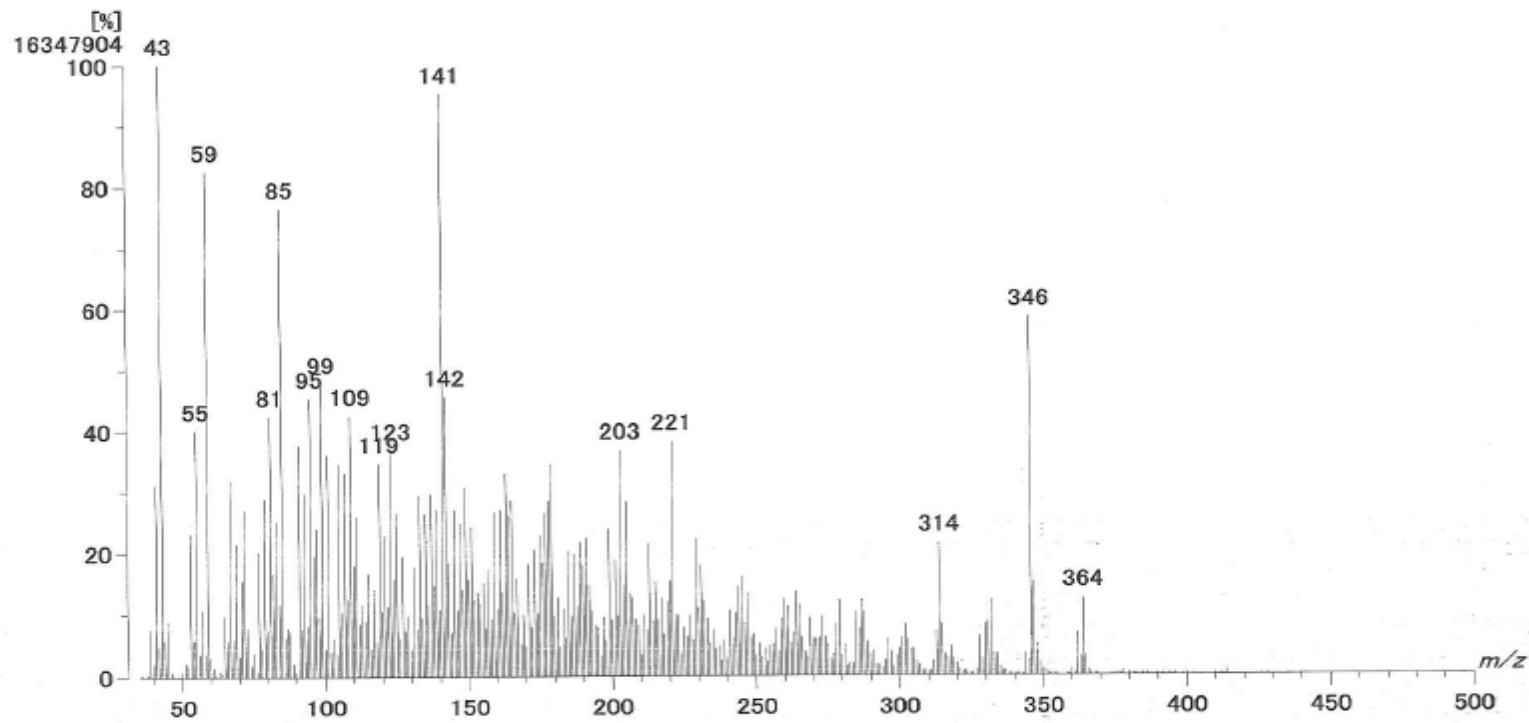

S22: LREIMS of 3

Inlet : Direct      Ion Mode : EI+  
RT : 1.48 min      Scan# : 38  
Elements : C 150/0, H 250/0, O 50/0  
Mass Tolerance : 5mmu  
Unsaturation (U.S.) : 0.0 – 20.0

|   | Observed m/z | Int%  | Err [ppm / mmu] | U.S. Composition |
|---|--------------|-------|-----------------|------------------|
| 1 | 364.2258     | 21.08 | +2.3 / +0.8     | 6.0 C21 H32 O5   |

S23: HREIMS of 3

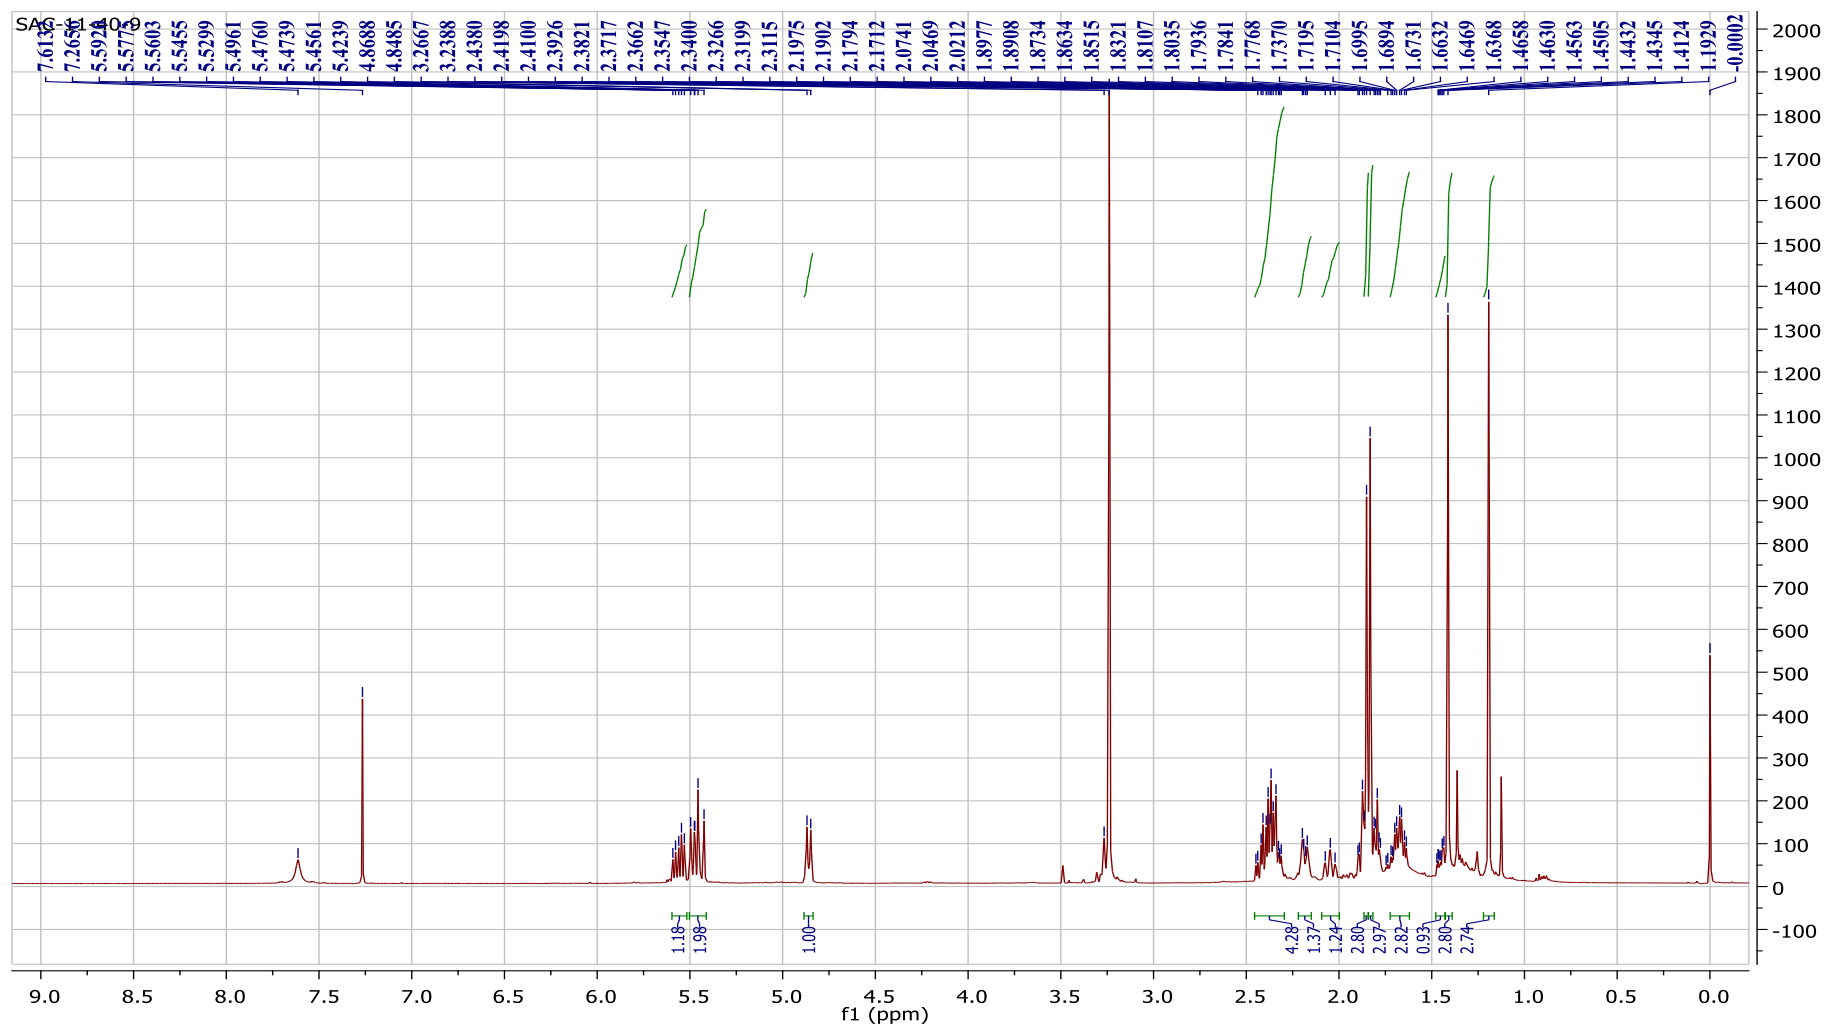

S24:  $^1\text{H}$  NMR of **3**

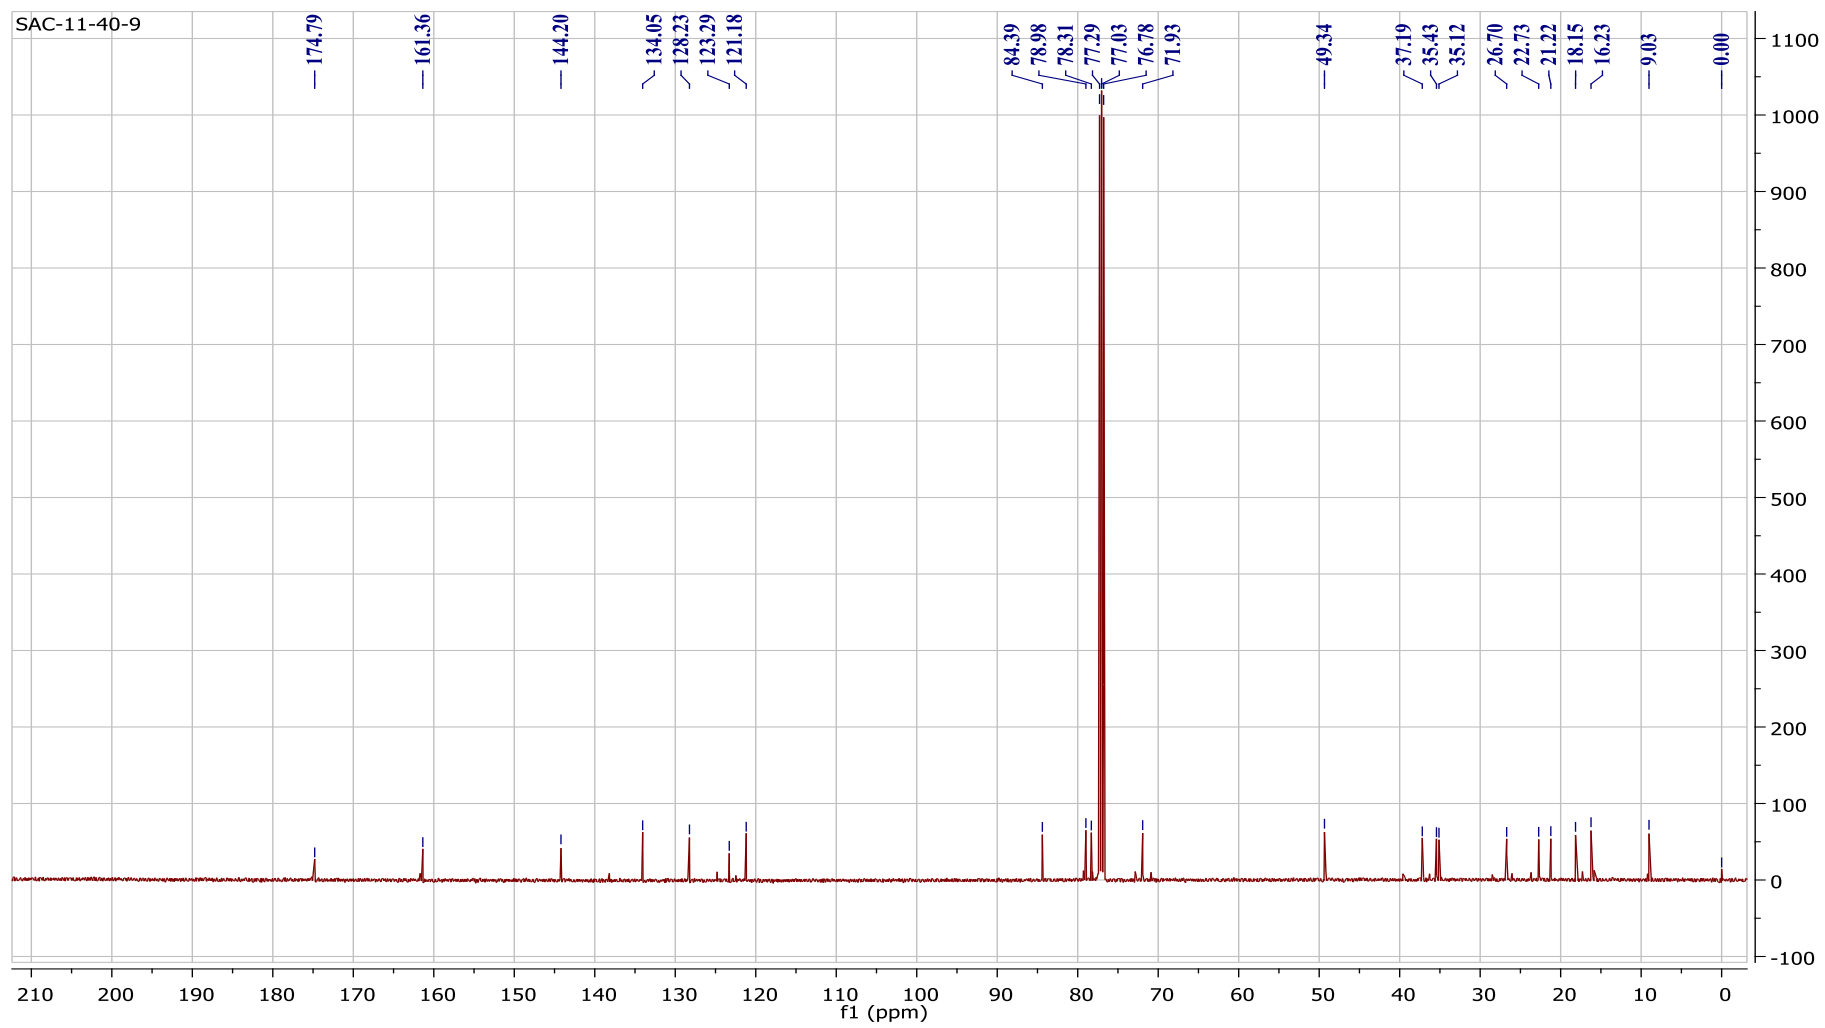

S25:  $^{13}\text{C}$  NMR of **3**

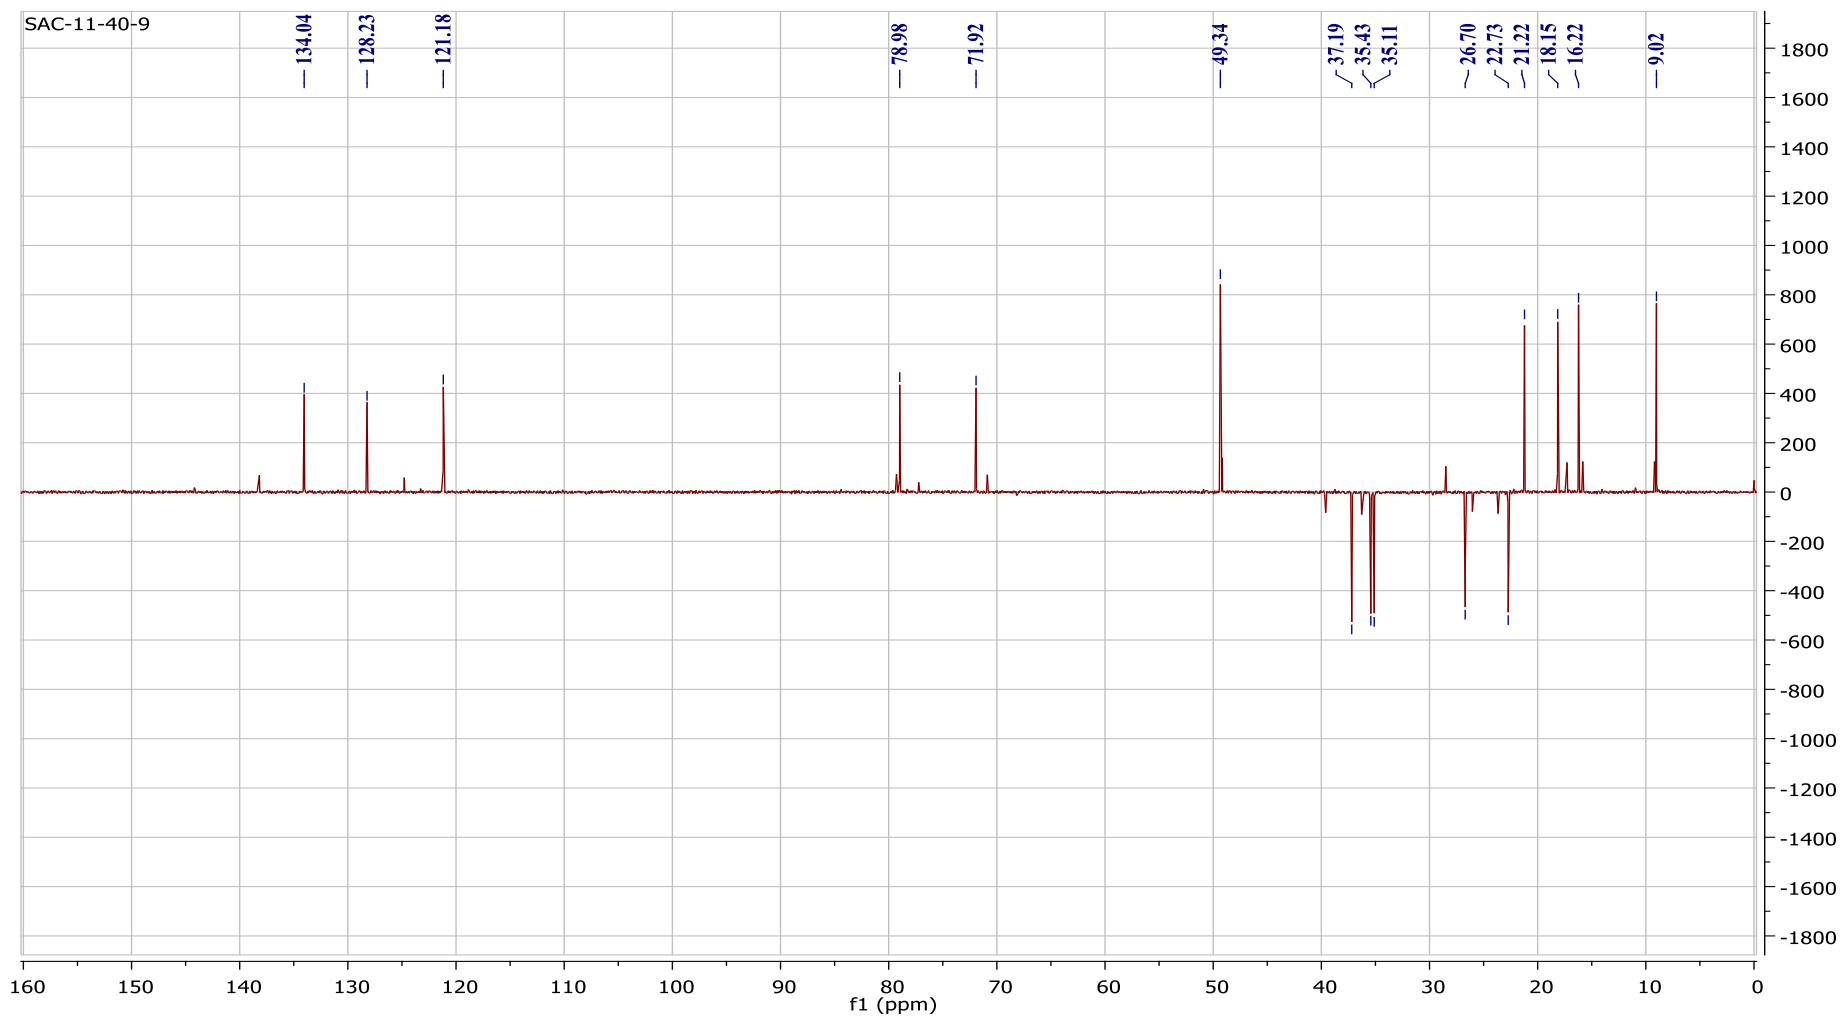

S26: DEPT of 3

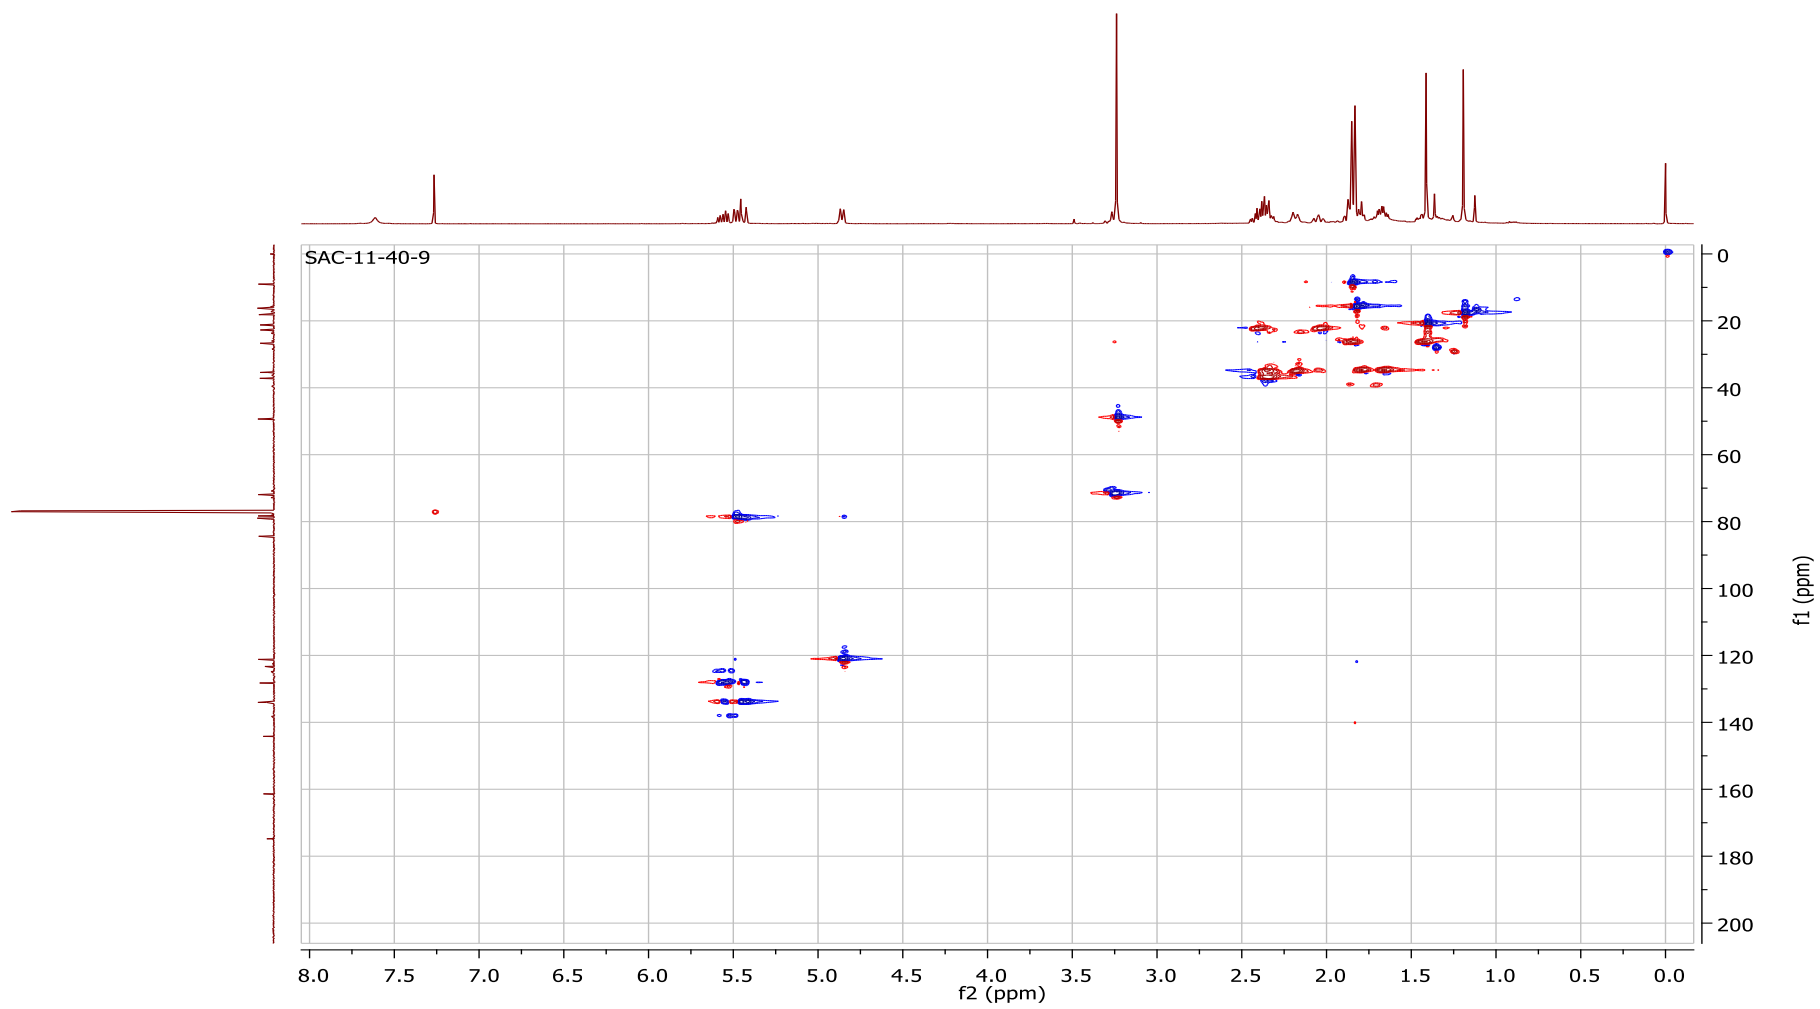

S27: HSQC of **3**

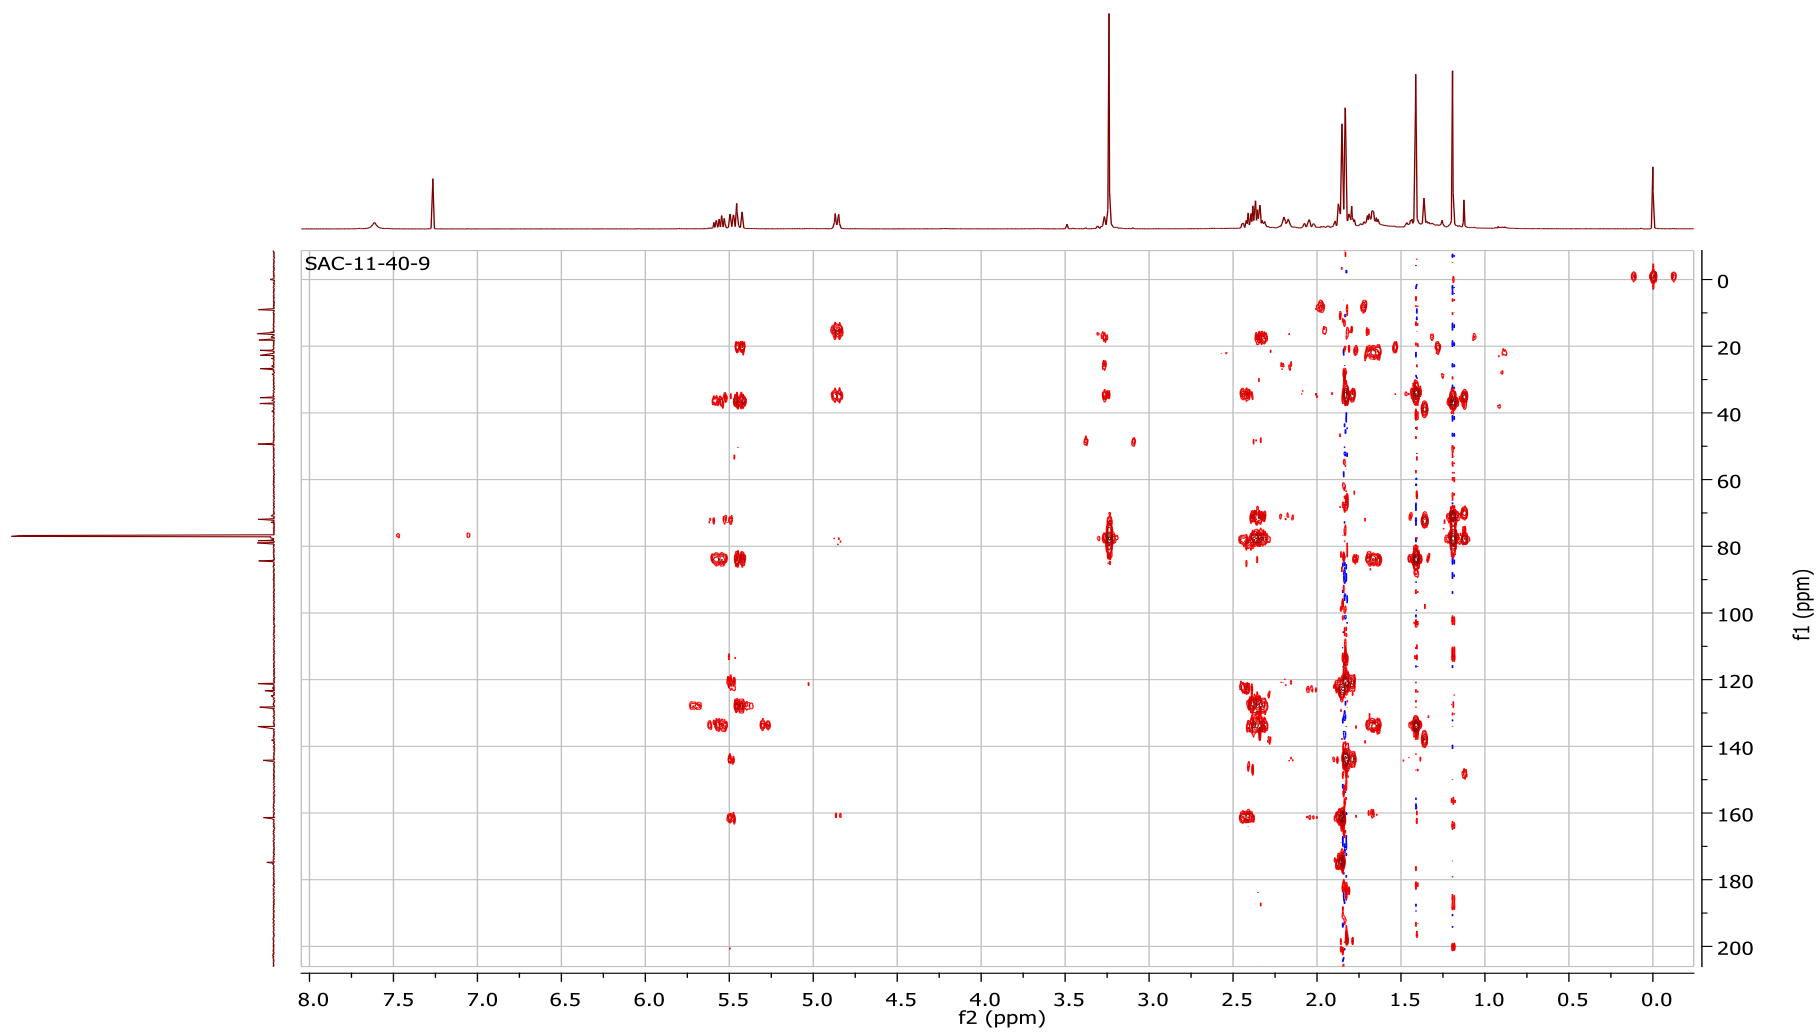

S28: HMBC of **3**

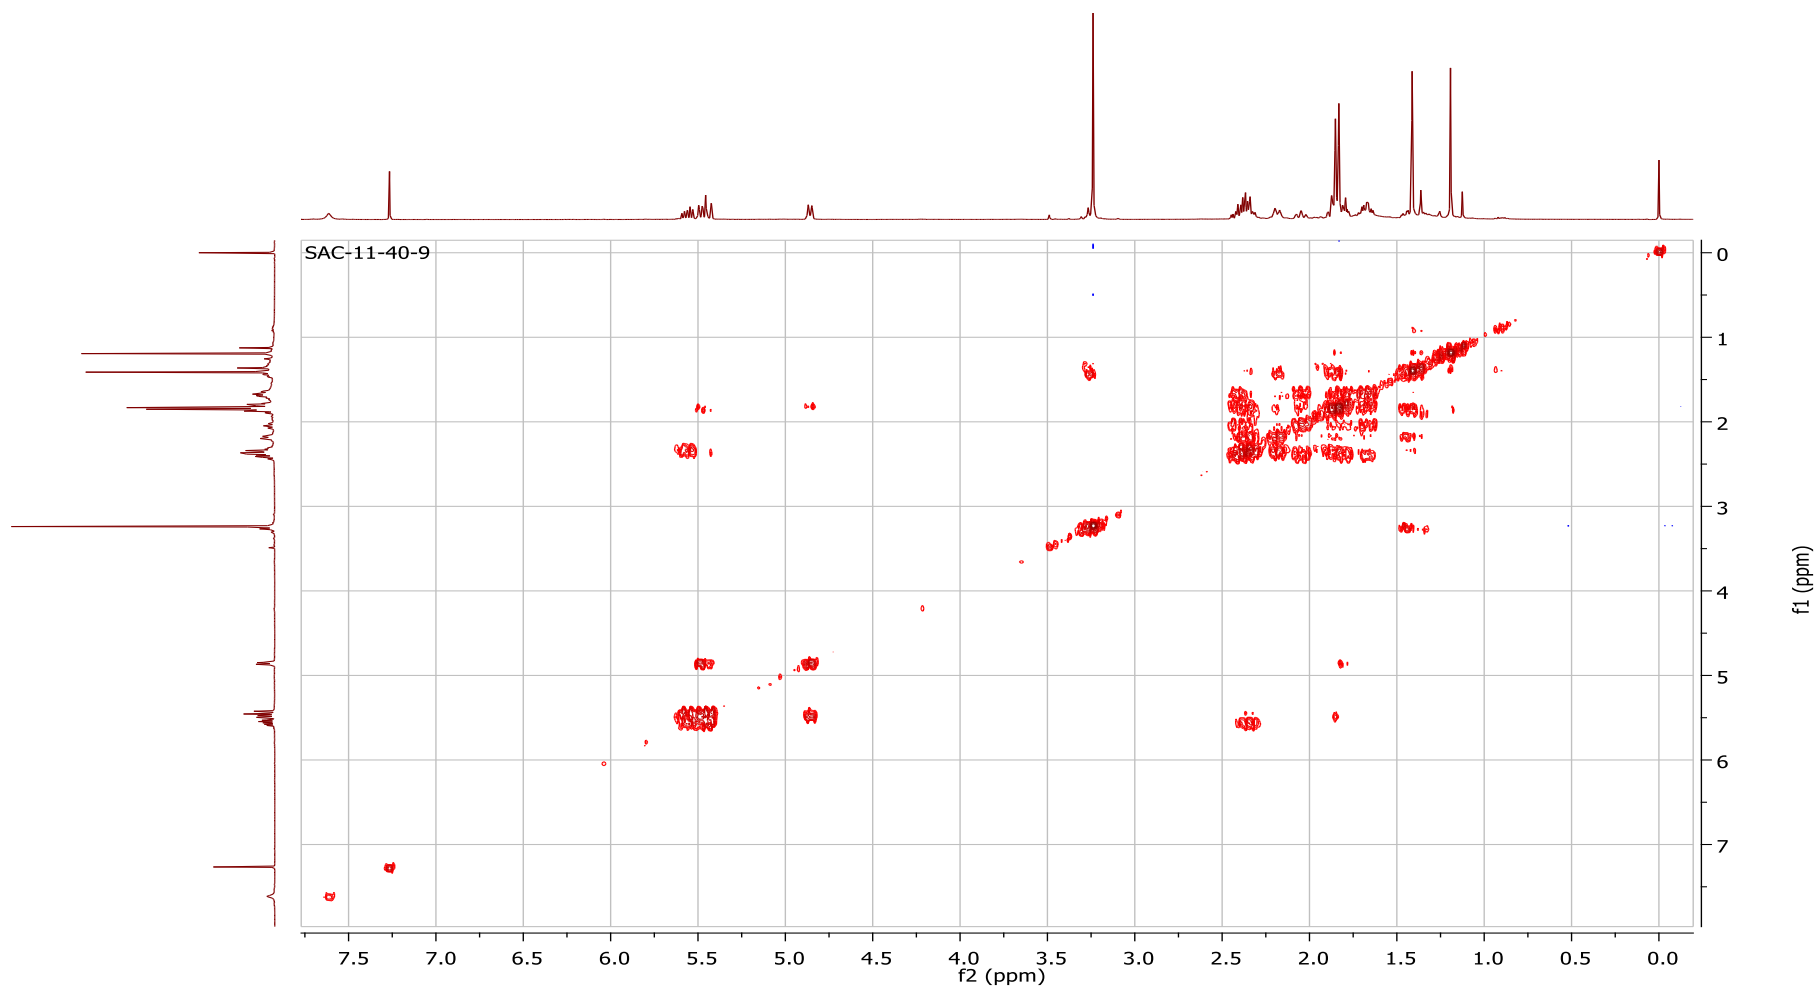

S29:  $^1\text{H}$   $^1\text{H}$  COSY of **3**



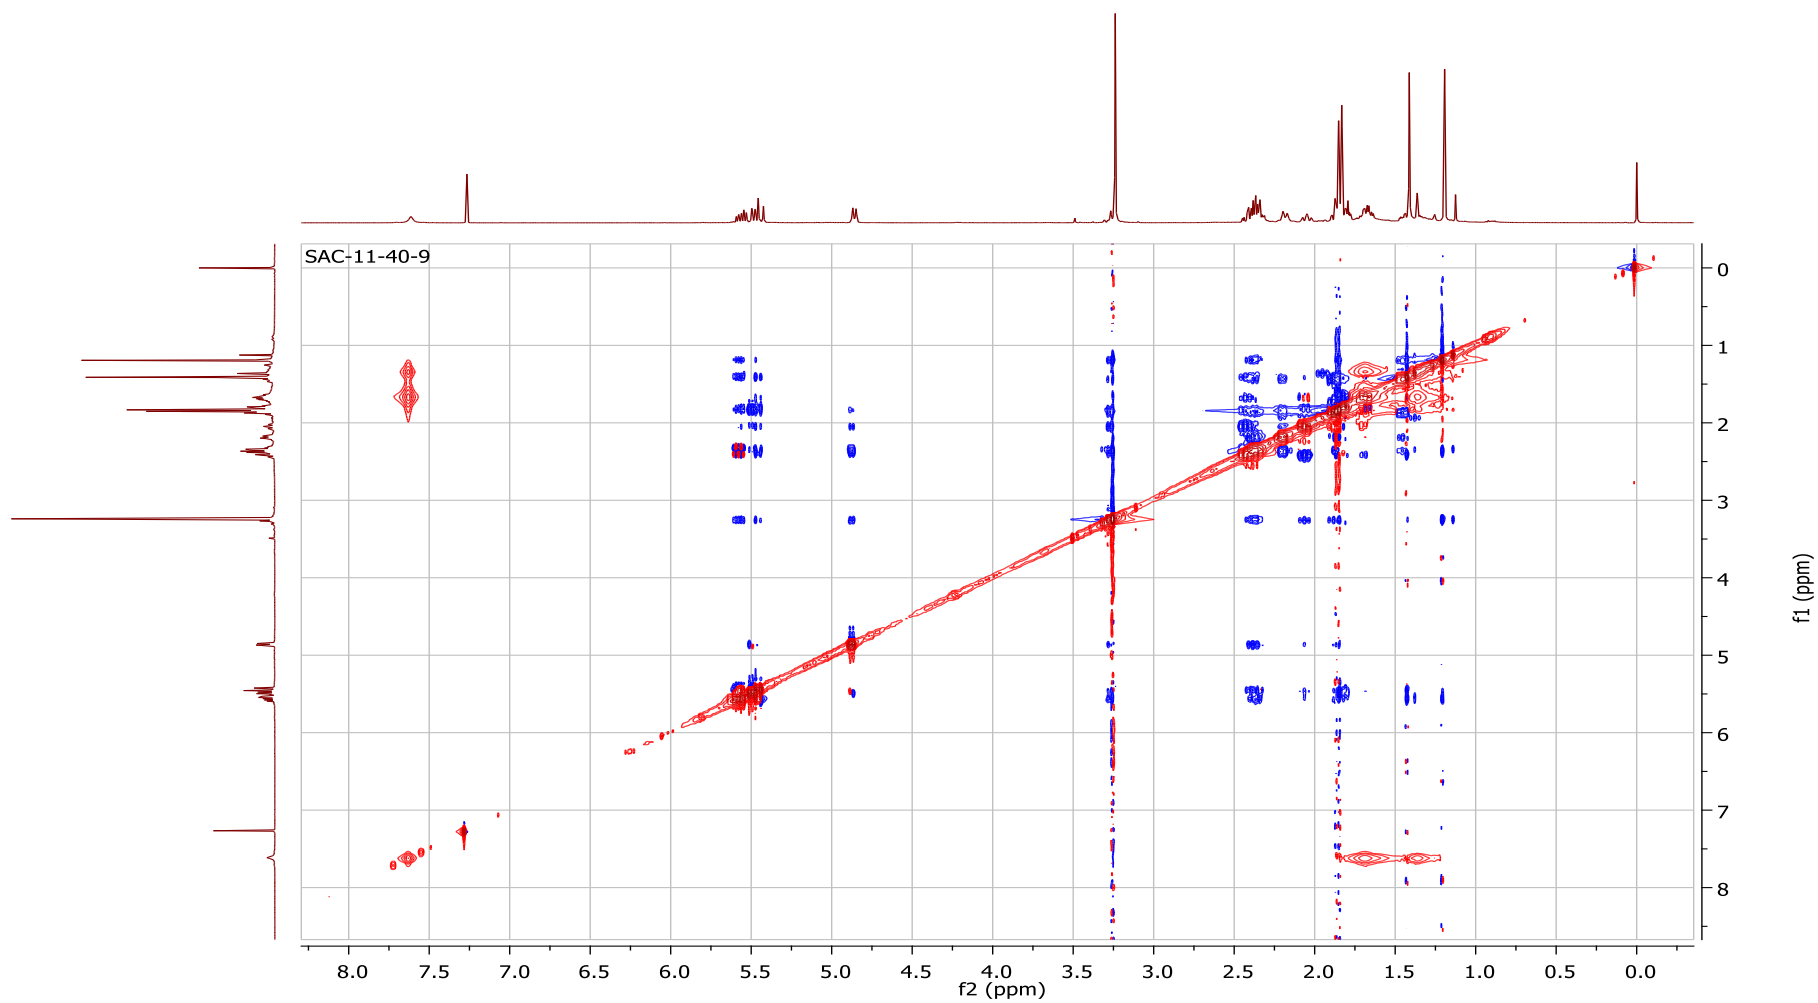

S30: NOESY of **3**

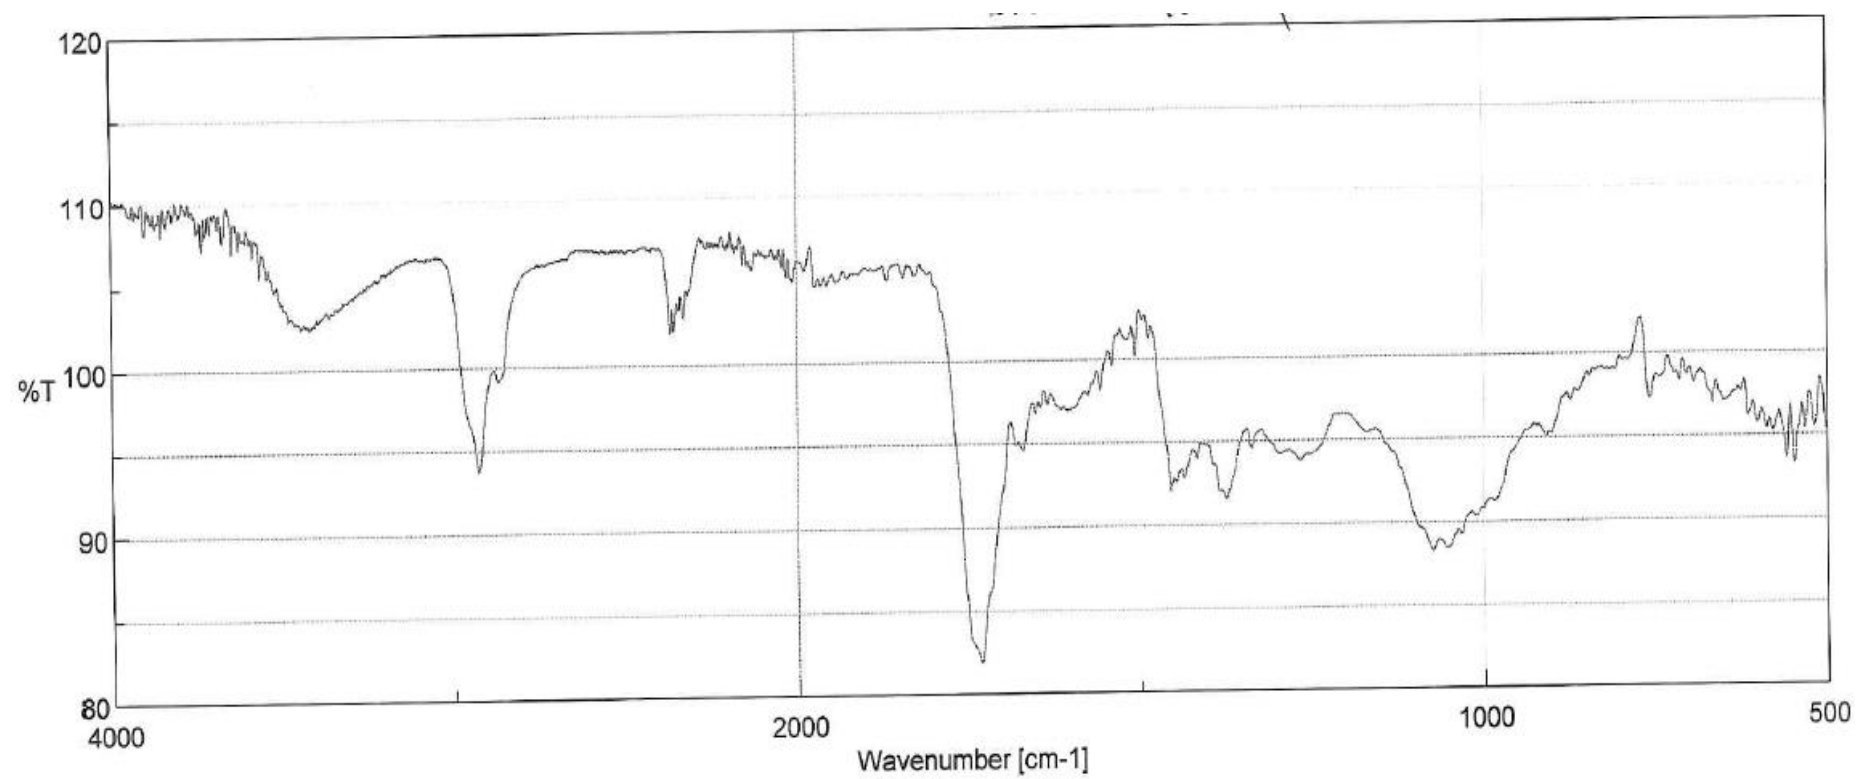

S31: FTIR of **4**

Inlet : Direct      Ion Mode : EI+  
Spectrum Type : Normal Ion [MF-Linear]  
RT : 1.44 min      Scan# : 44  
BP : m/z 43      Int. : 1599.98 (16776960)  
Output m/z range : 35 to 500      Cut Level : 0.00 %

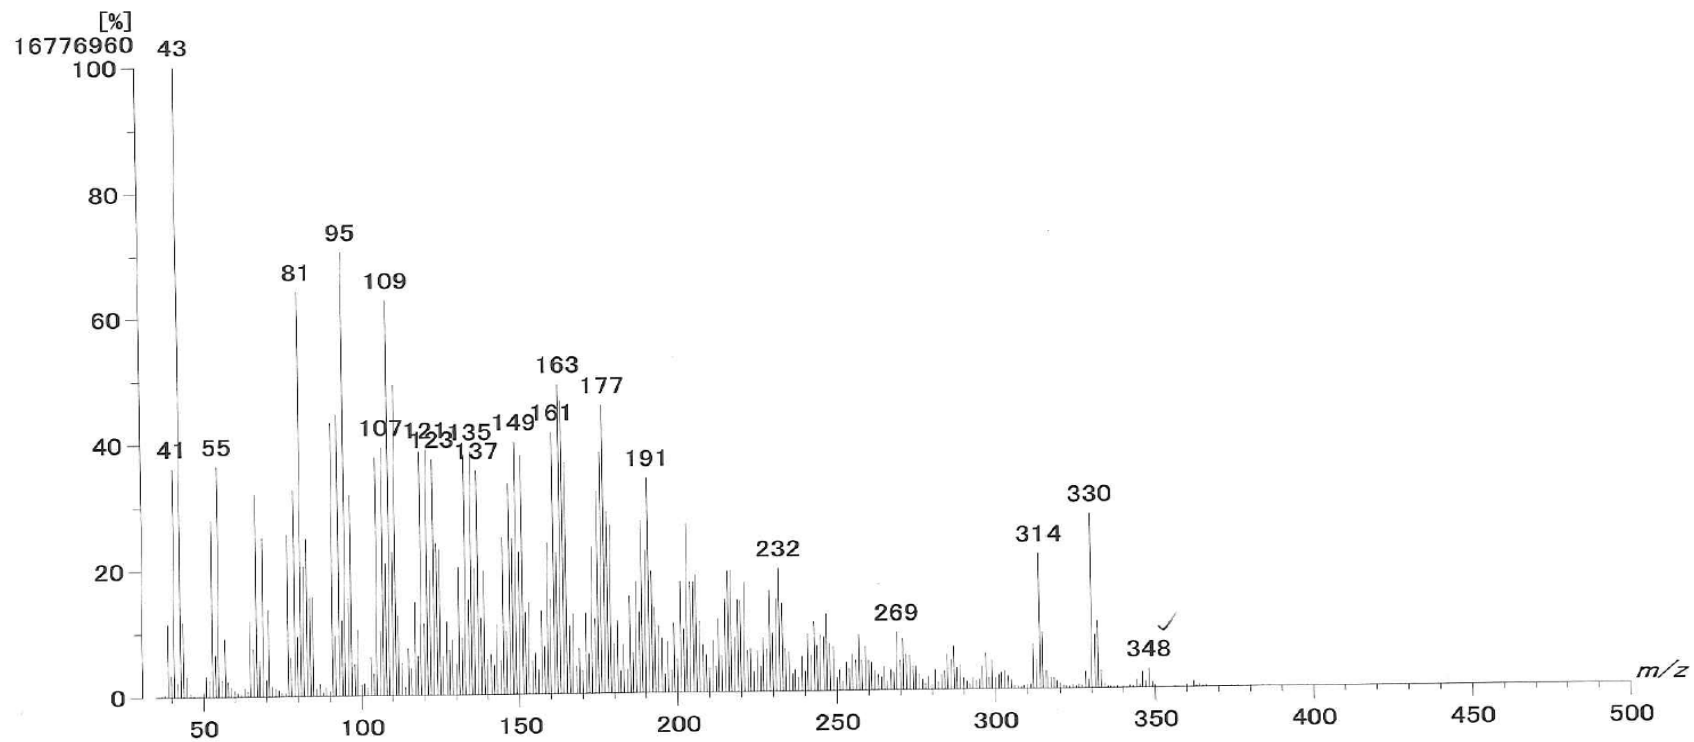

S32: LREIMS of **4**

Inlet : Direct      Ion Mode : EI+  
RT : 2.08 min      Scan# : 53  
Elements : C 150/0, H 250/0, O 50/0  
Mass Tolerance : 5mmu  
Unsaturation (U.S.) : 0.0 – 15.0

|   | Observed m/z | Int% | Err [ppm / mmu] | U.S. Composition |
|---|--------------|------|-----------------|------------------|
| 1 | 348.1939     | 5.37 | +0.6 / +0.2     | 7.0 C20 H28 O5   |

S33: HRCIMS of 4

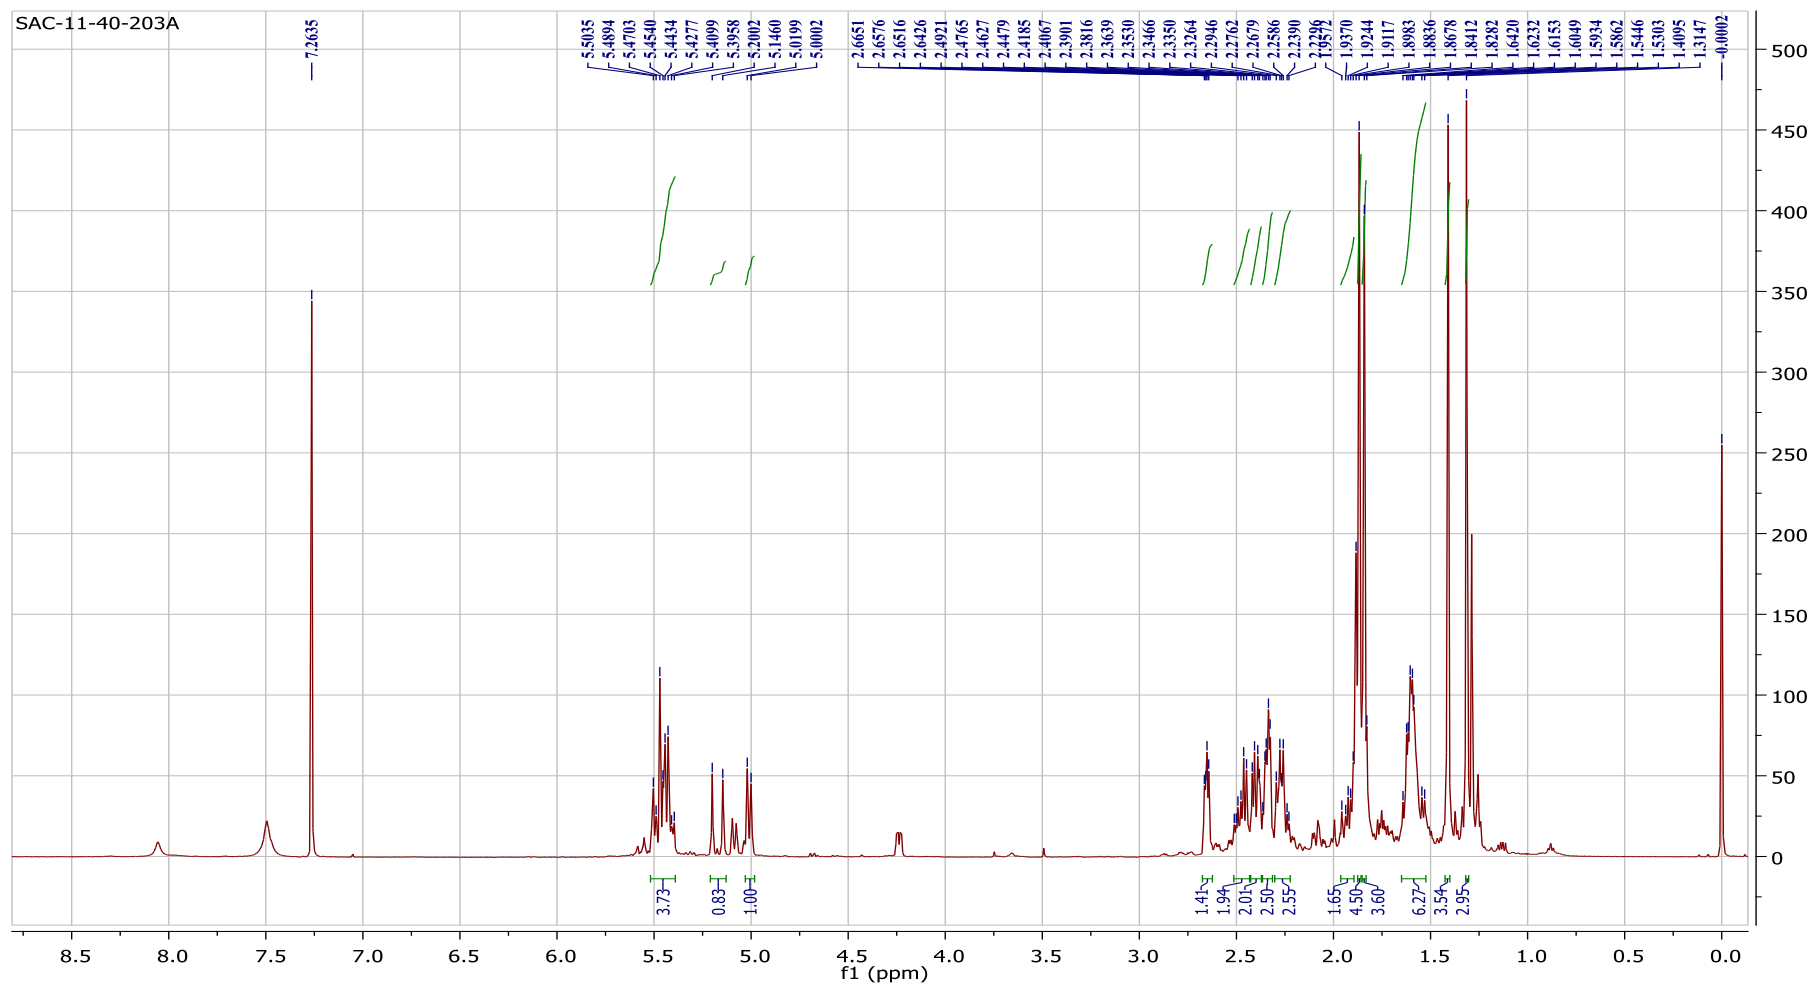

S34:  $^1\text{H}$  NMR of **4**

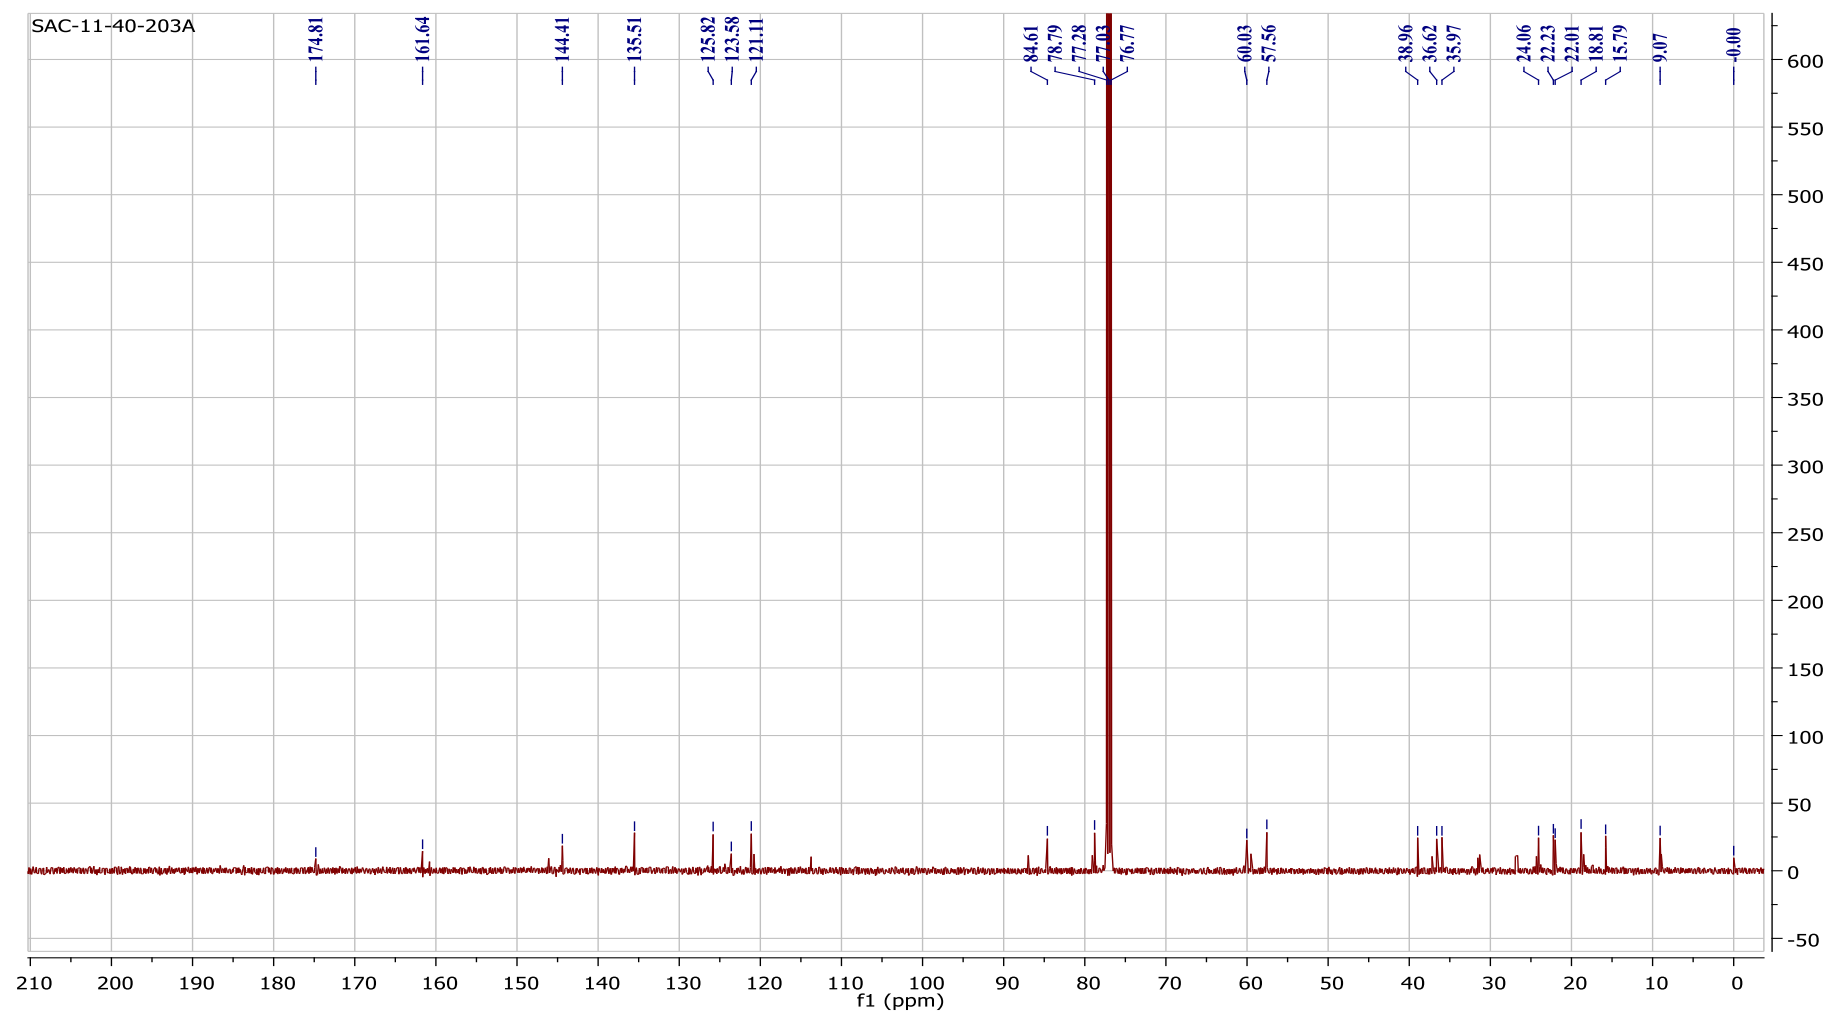

S35:  $^{13}\text{C}$  NMR of **4**

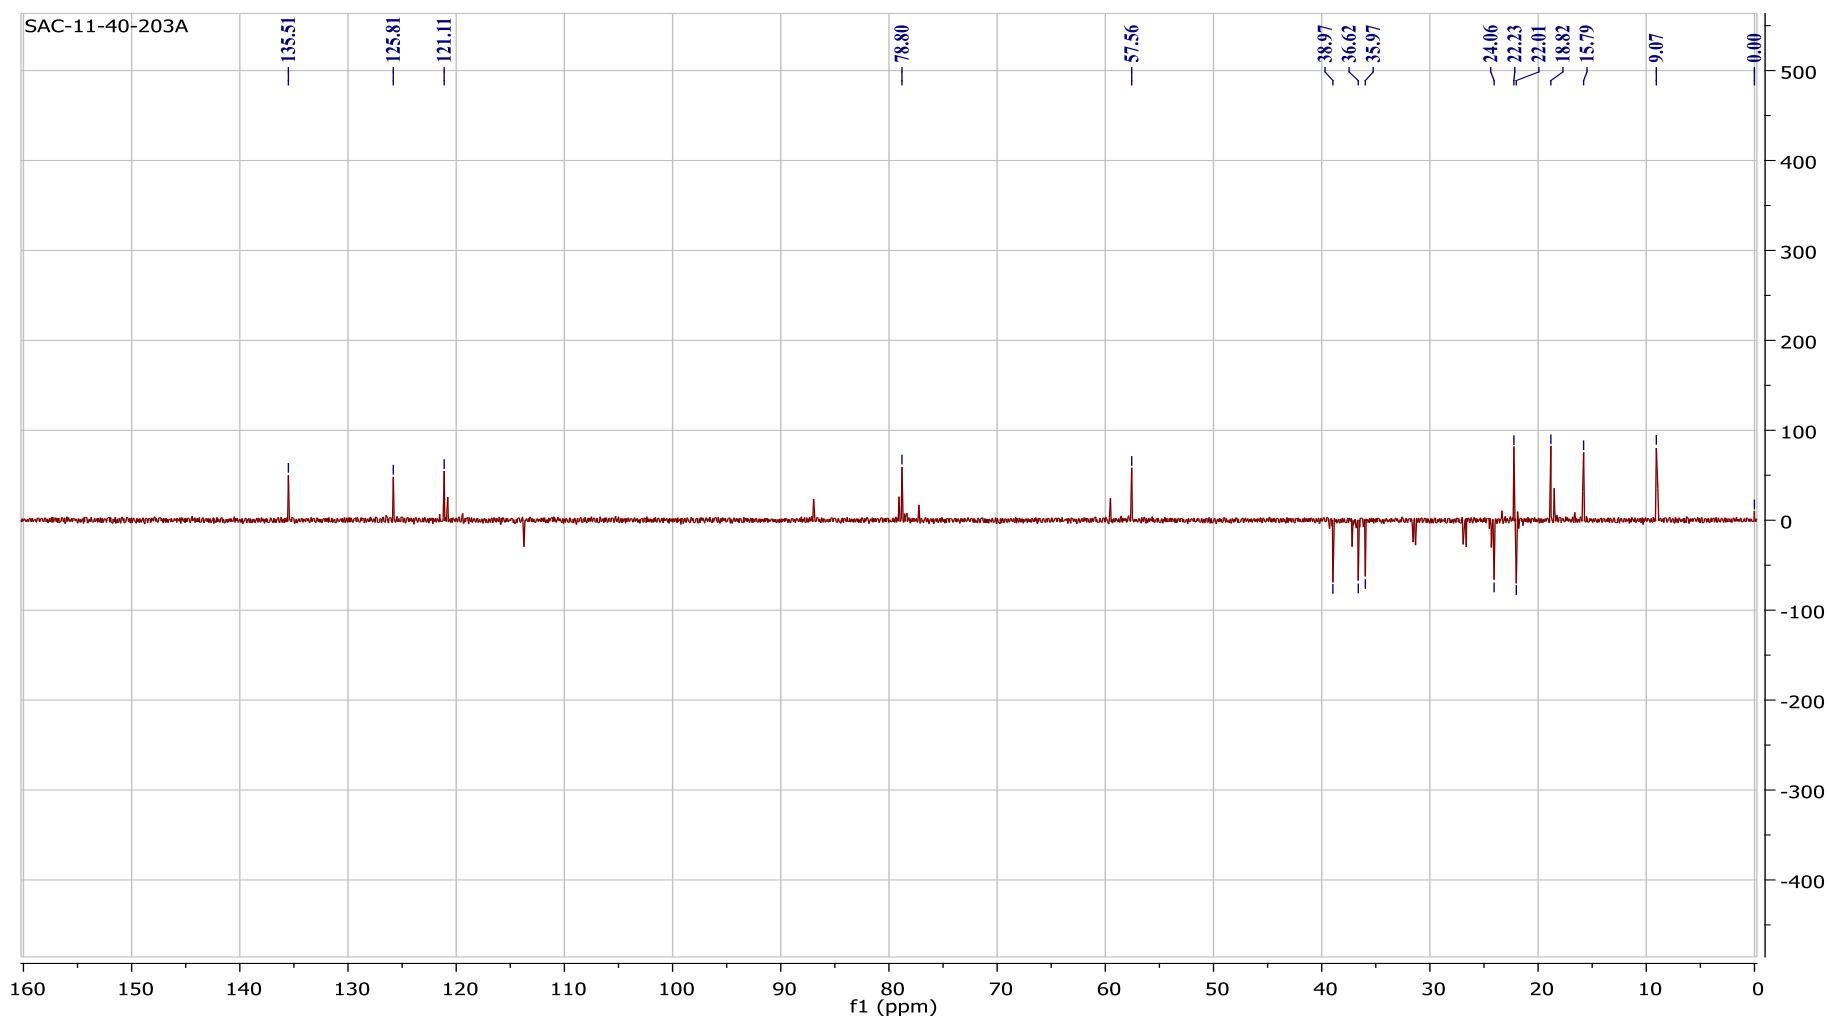

S36: DEPT of 4

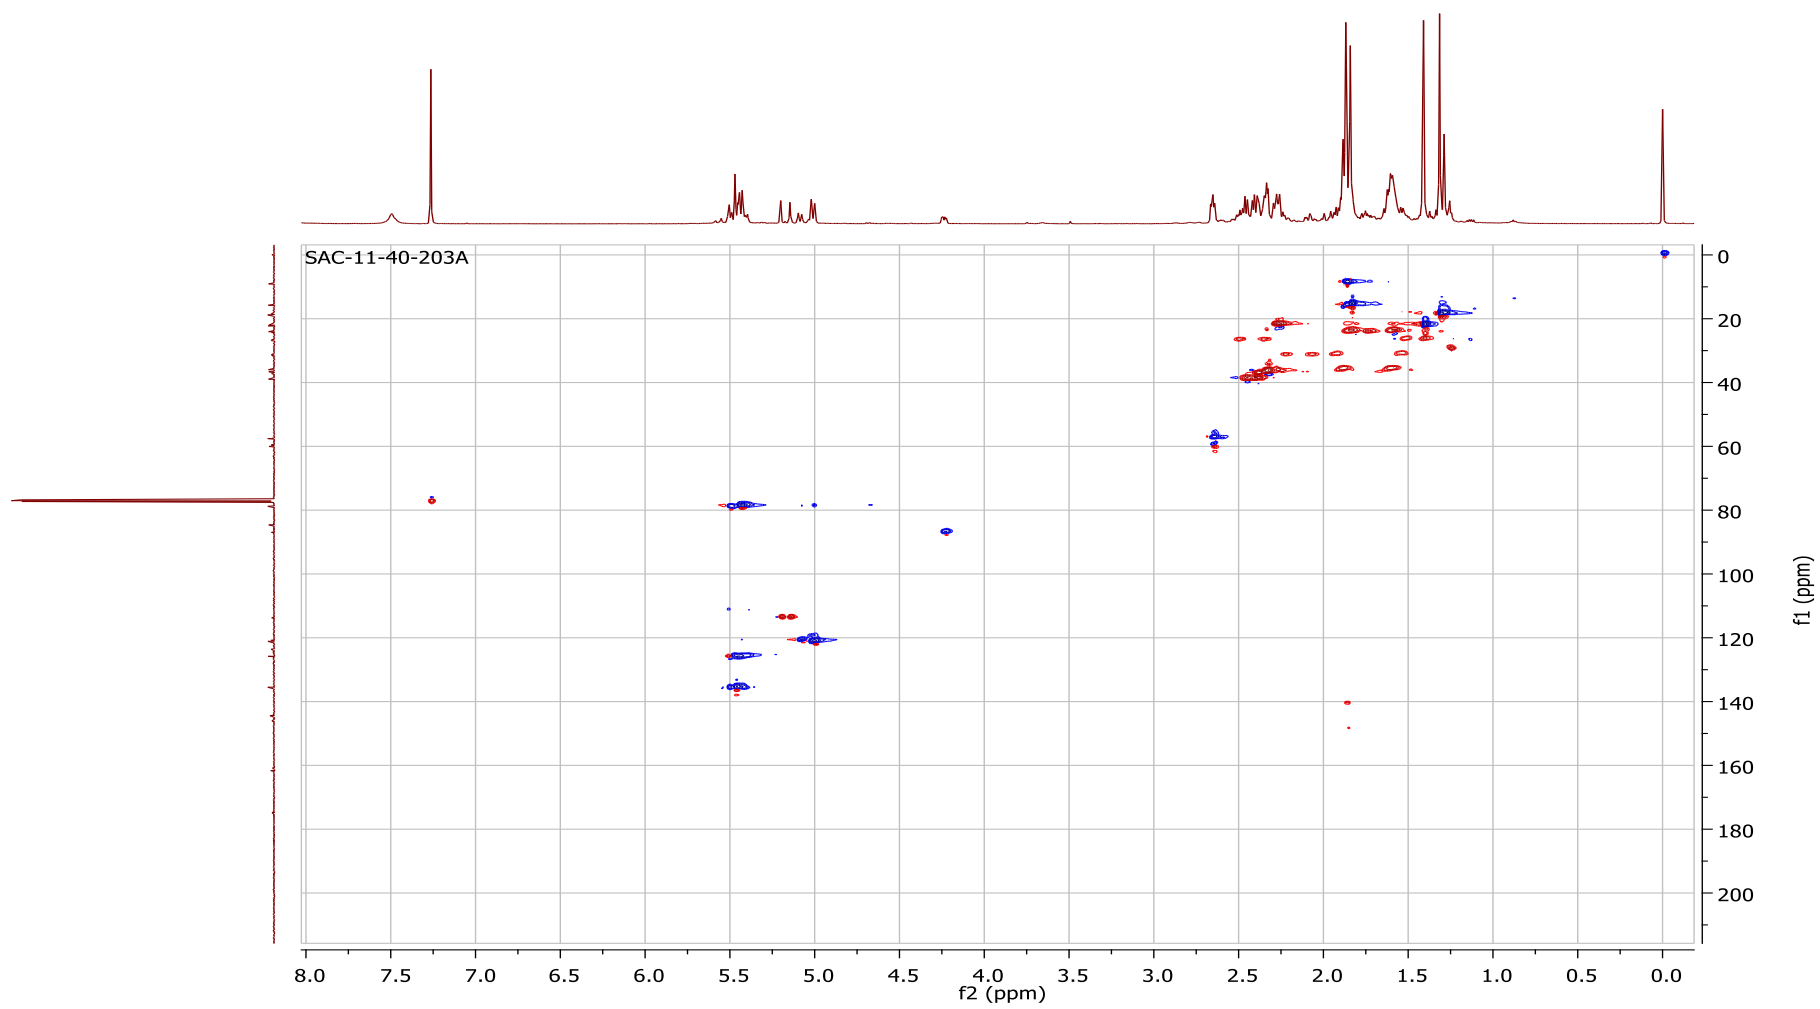

S37: HSQC of **4**



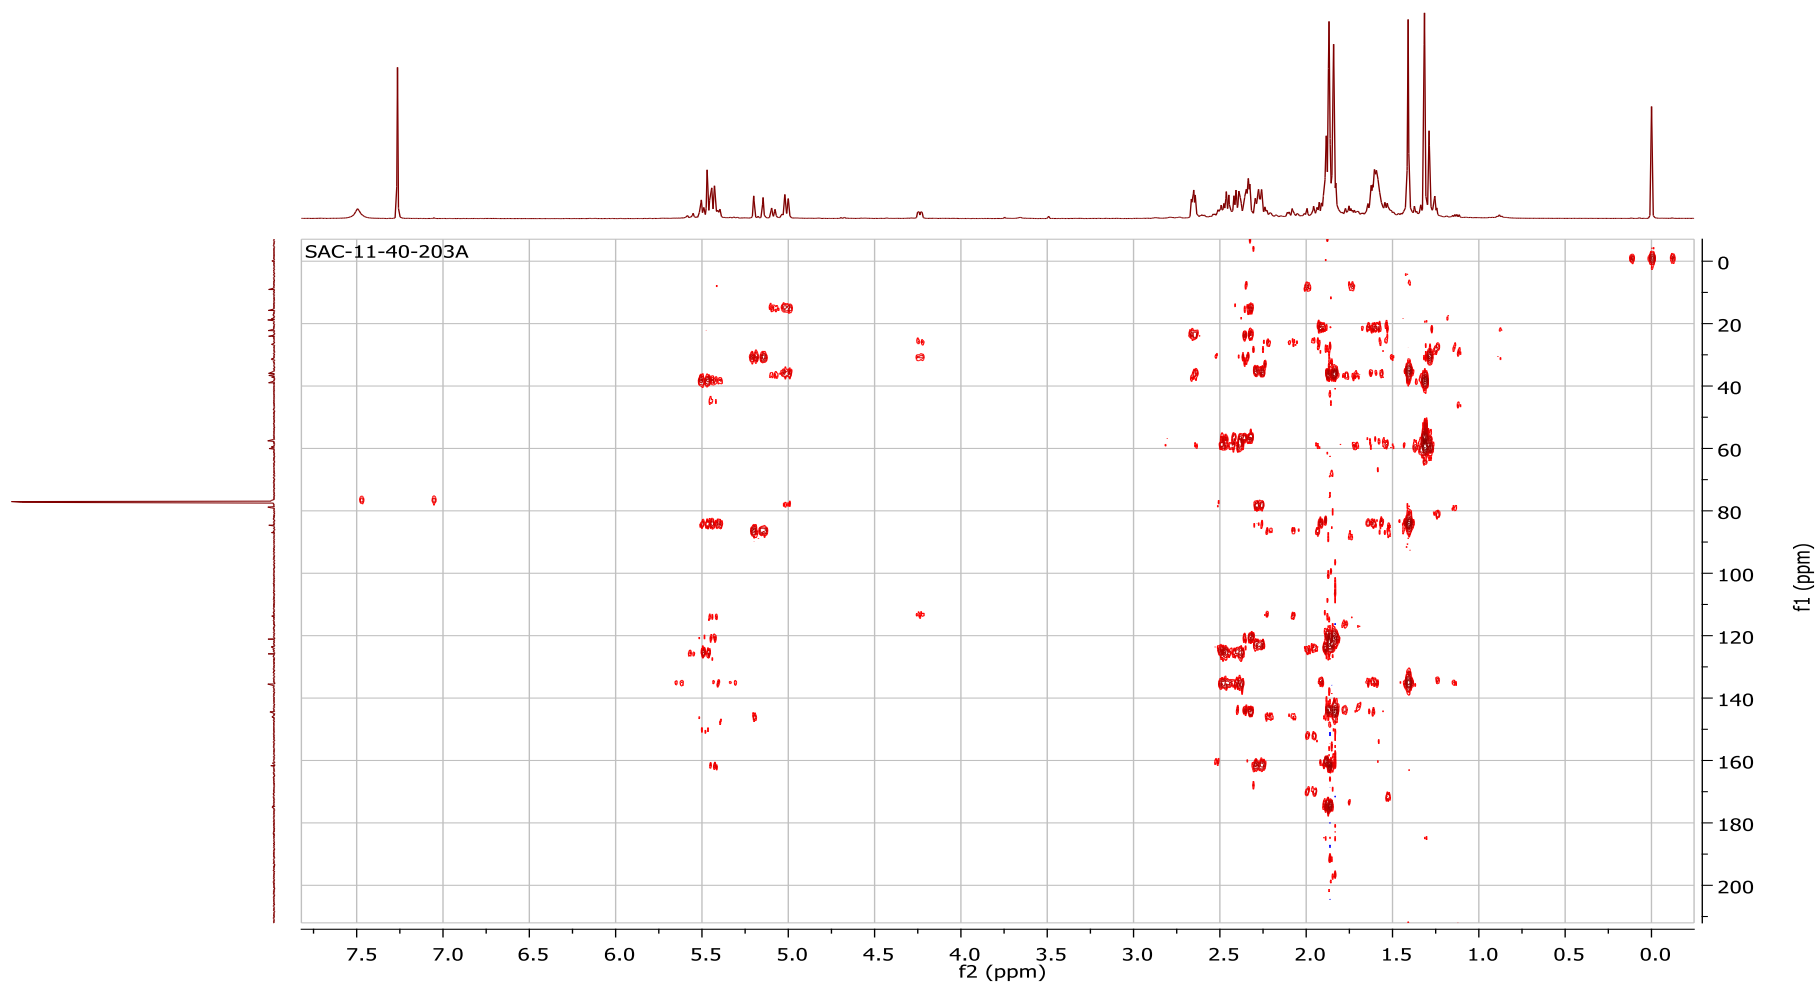

S38: HMBC of **4**

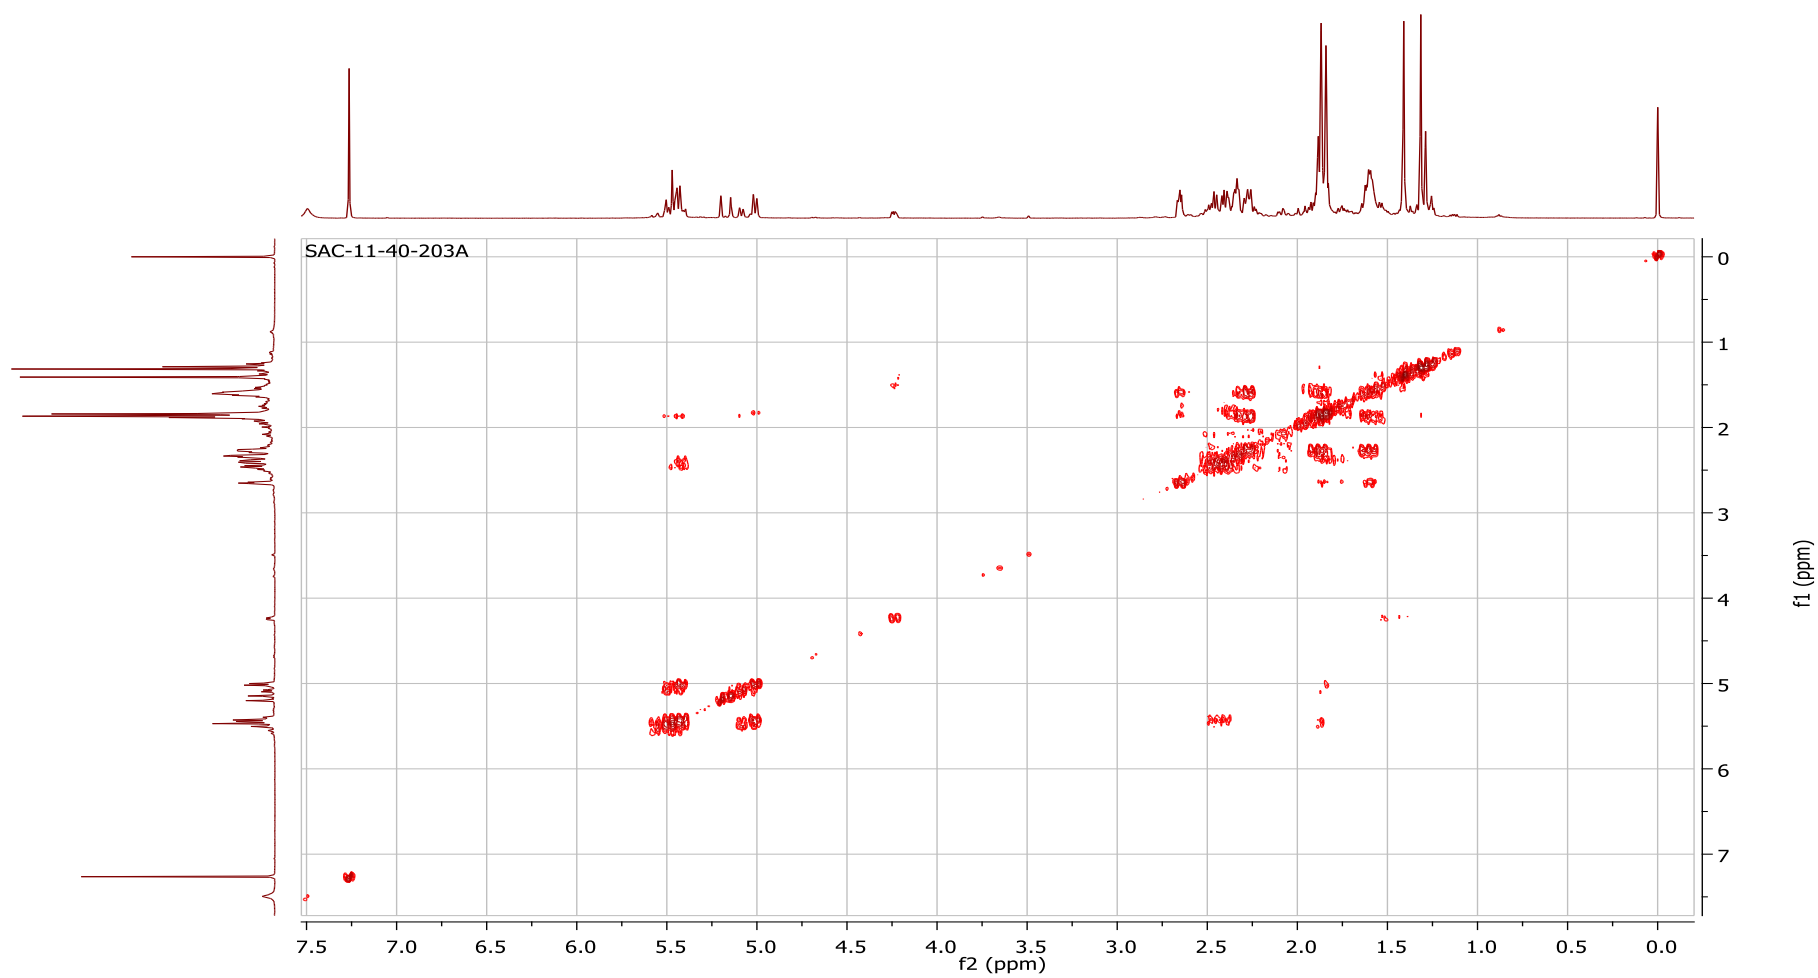

S39:  $^1\text{H}$   $^1\text{H}$  COSY of **4**

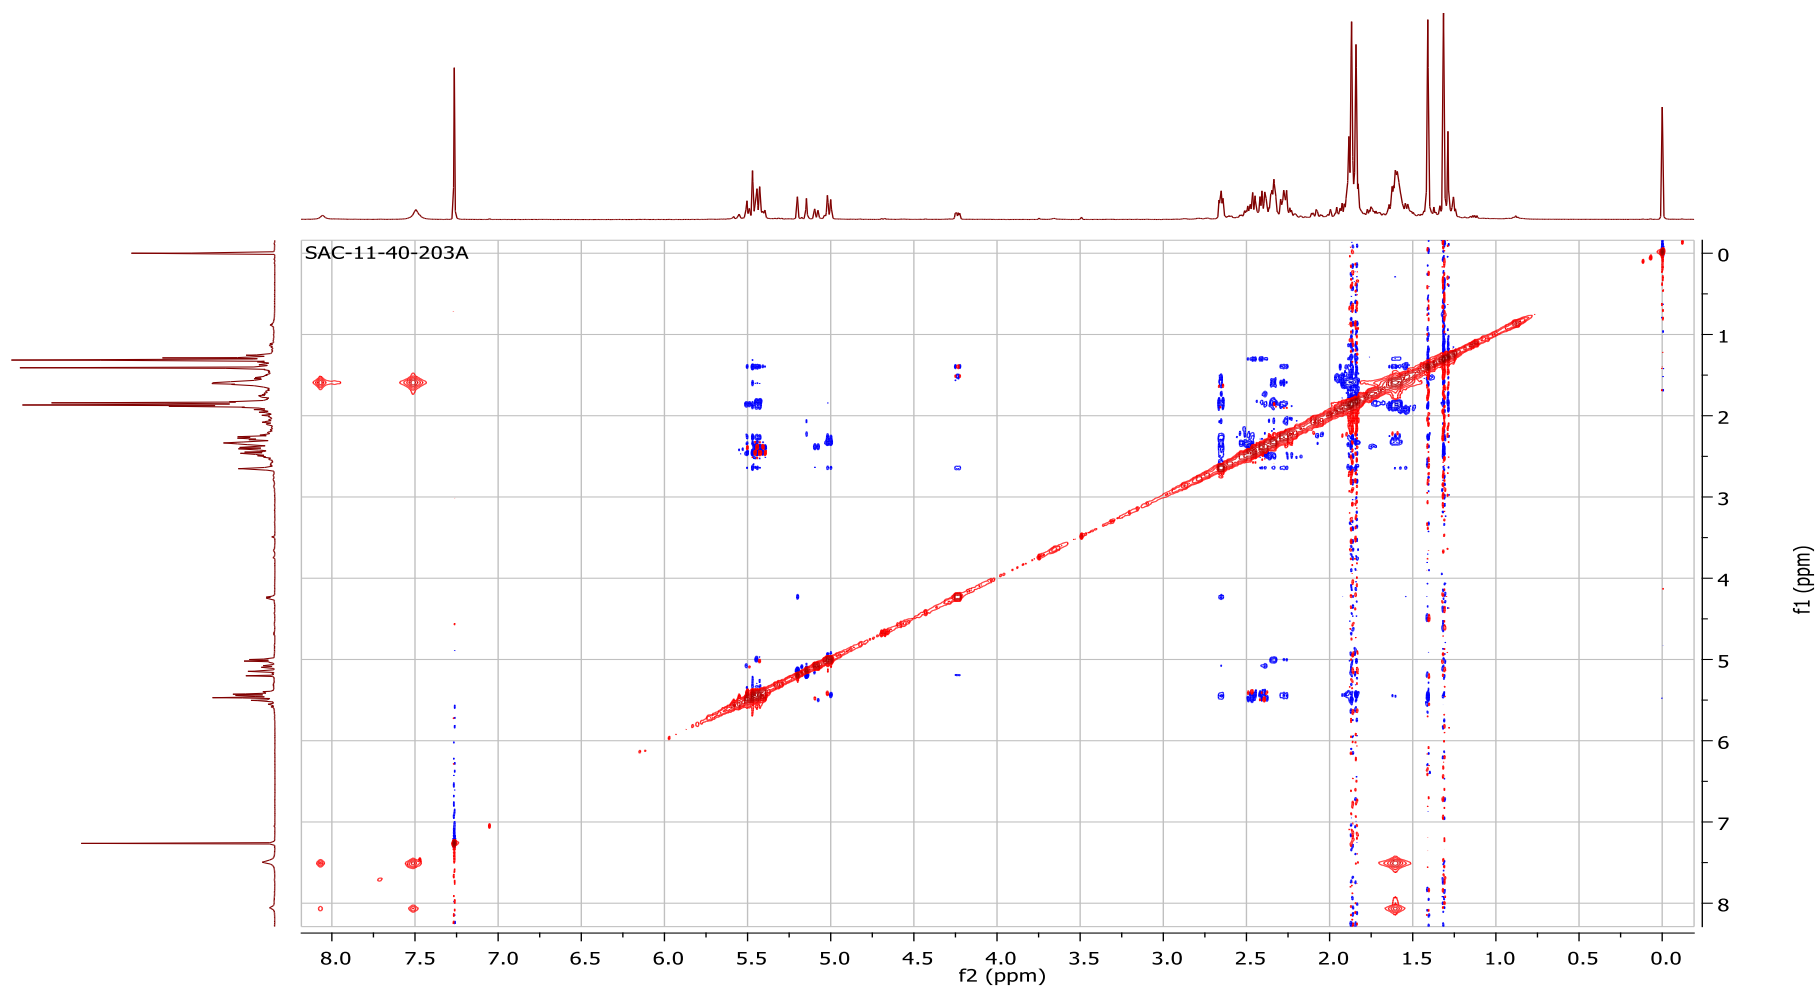

S40: NOESY of **4**

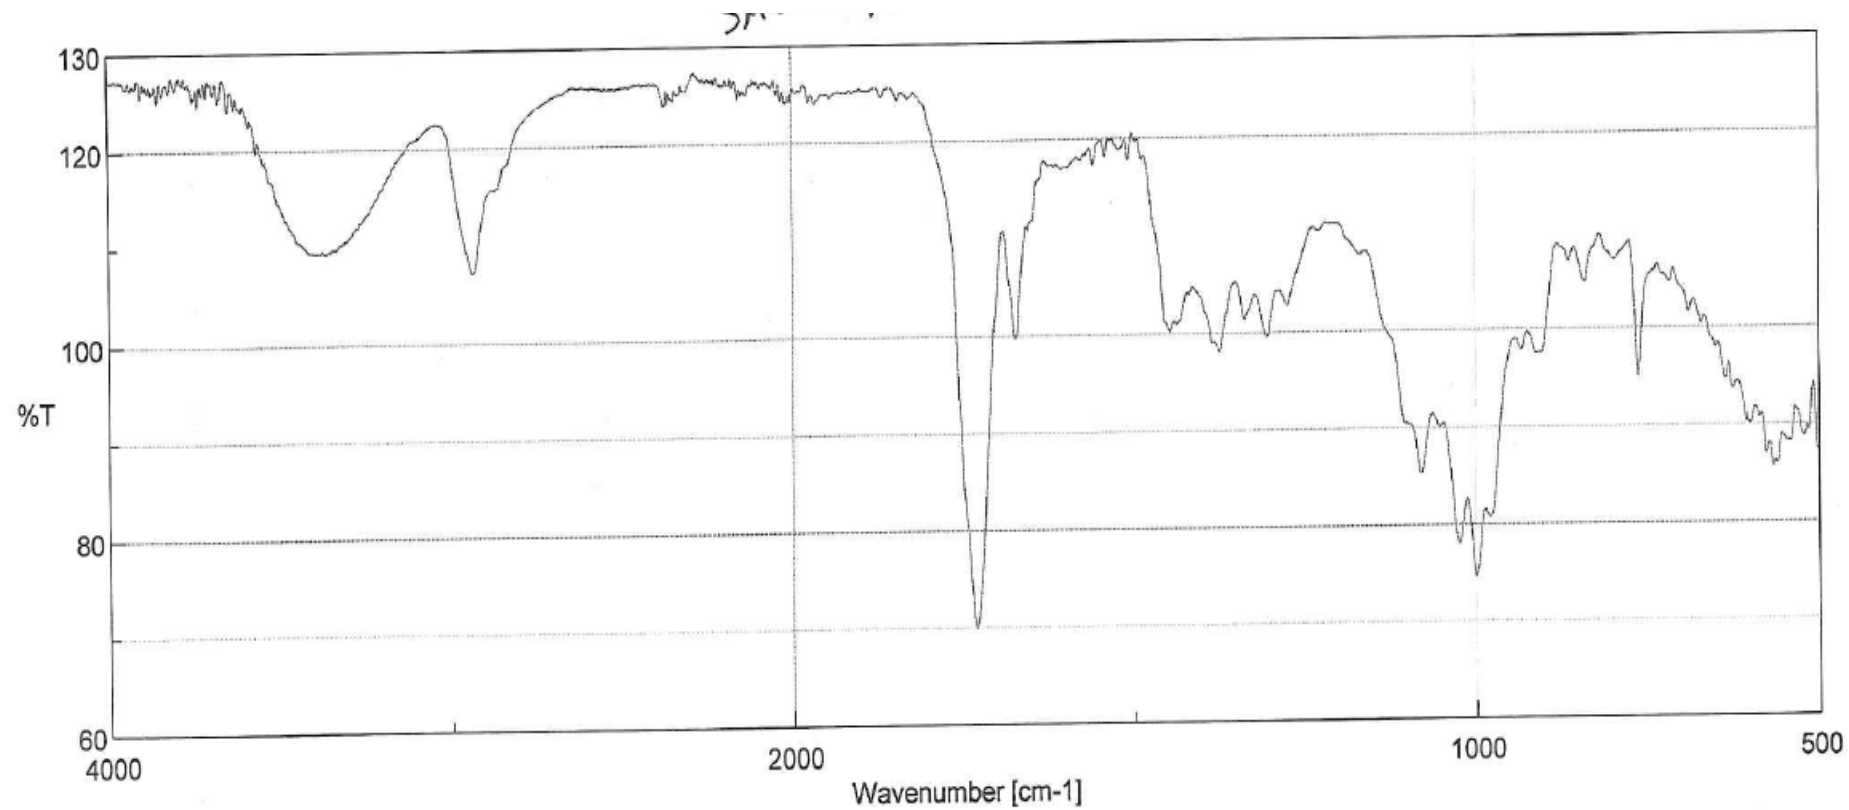

S41: FTIR of 5

Inlet : Direct      Ion Mode : CI+  
Spectrum Type : Normal Ion [MF-Linear]  
RT : 1.99 min      Scan# : 74  
BP : m/z 331      Int. : 385.72 (4044608)  
Output m/z range : 35 to 500      Cut Level : 0.00 %

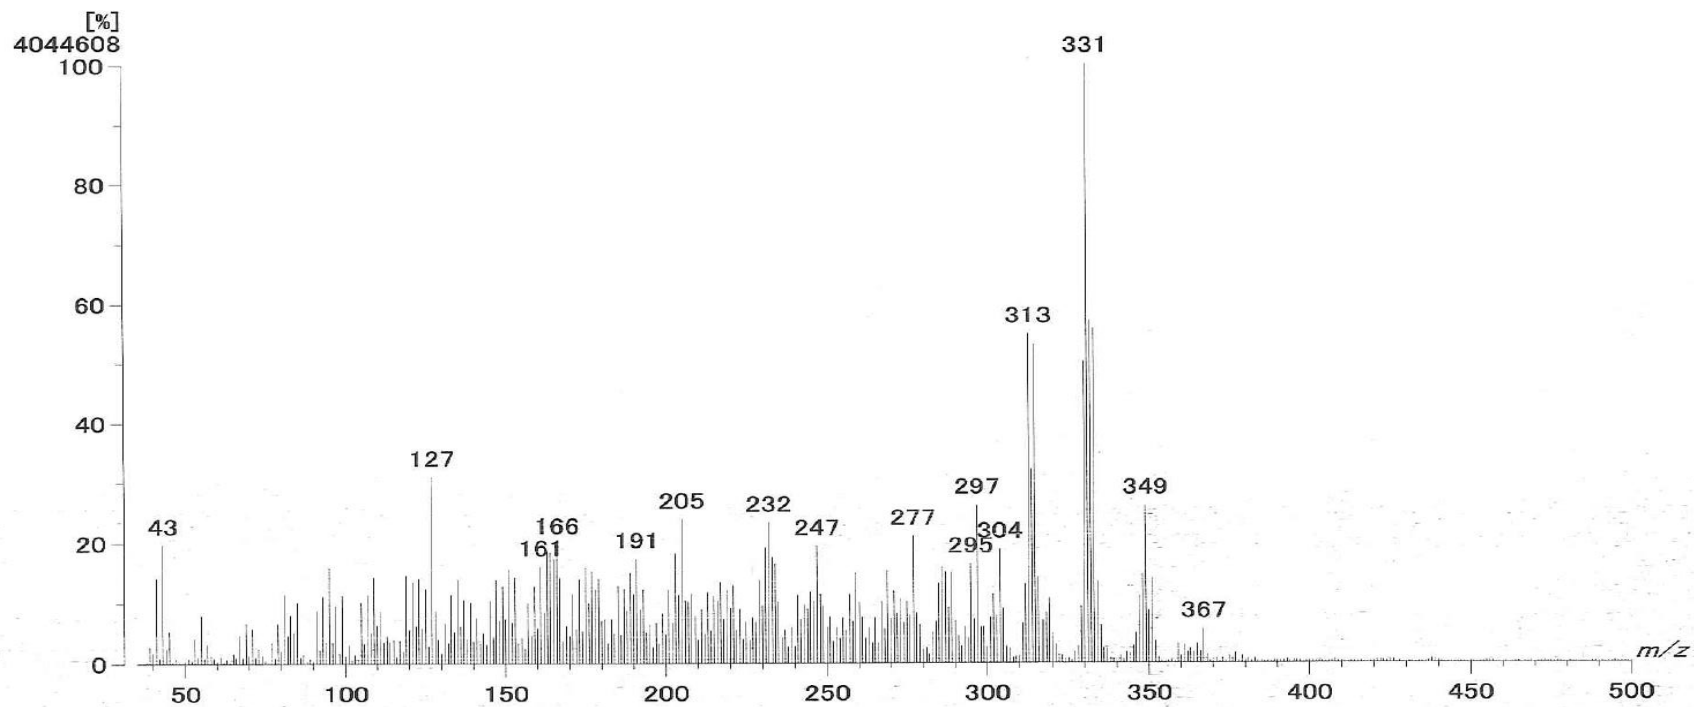

S42: LRCIMS of 5

Inlet : Direct      Ion Mode : CI+  
 RT : 1.64 min      Scan# : 42  
 Elements : C 150/0, H 250/0, O 50/0  
 Mass Tolerance : 5mmu  
 Unsaturation (U.S.) : 0.0 – 15.0

|   | Observed m/z | Int% | Err [ppm / mmu] | U.S. Composition |
|---|--------------|------|-----------------|------------------|
| 1 | 367.2130     | 3.63 | +2.5 / +0.9     | 5.5 C20 H31 O6   |

S43: HRCIMS of 5

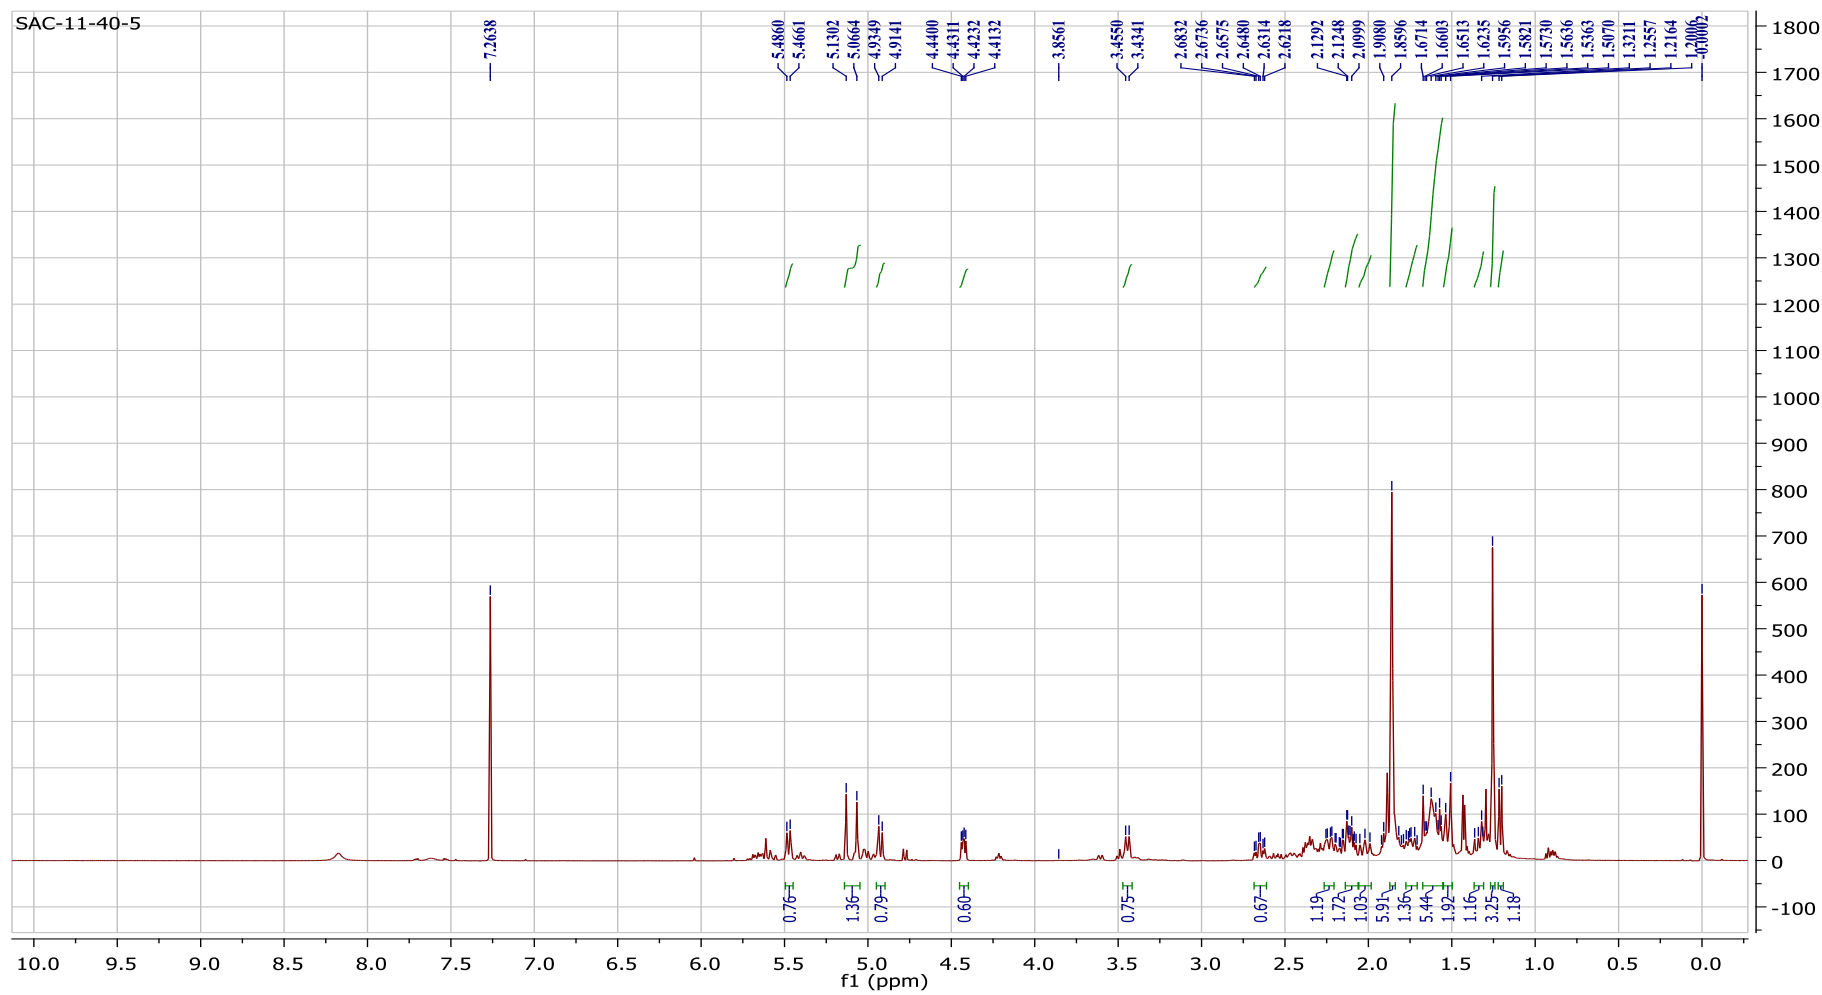

S44:  $^1\text{H}$  NMR of **5**

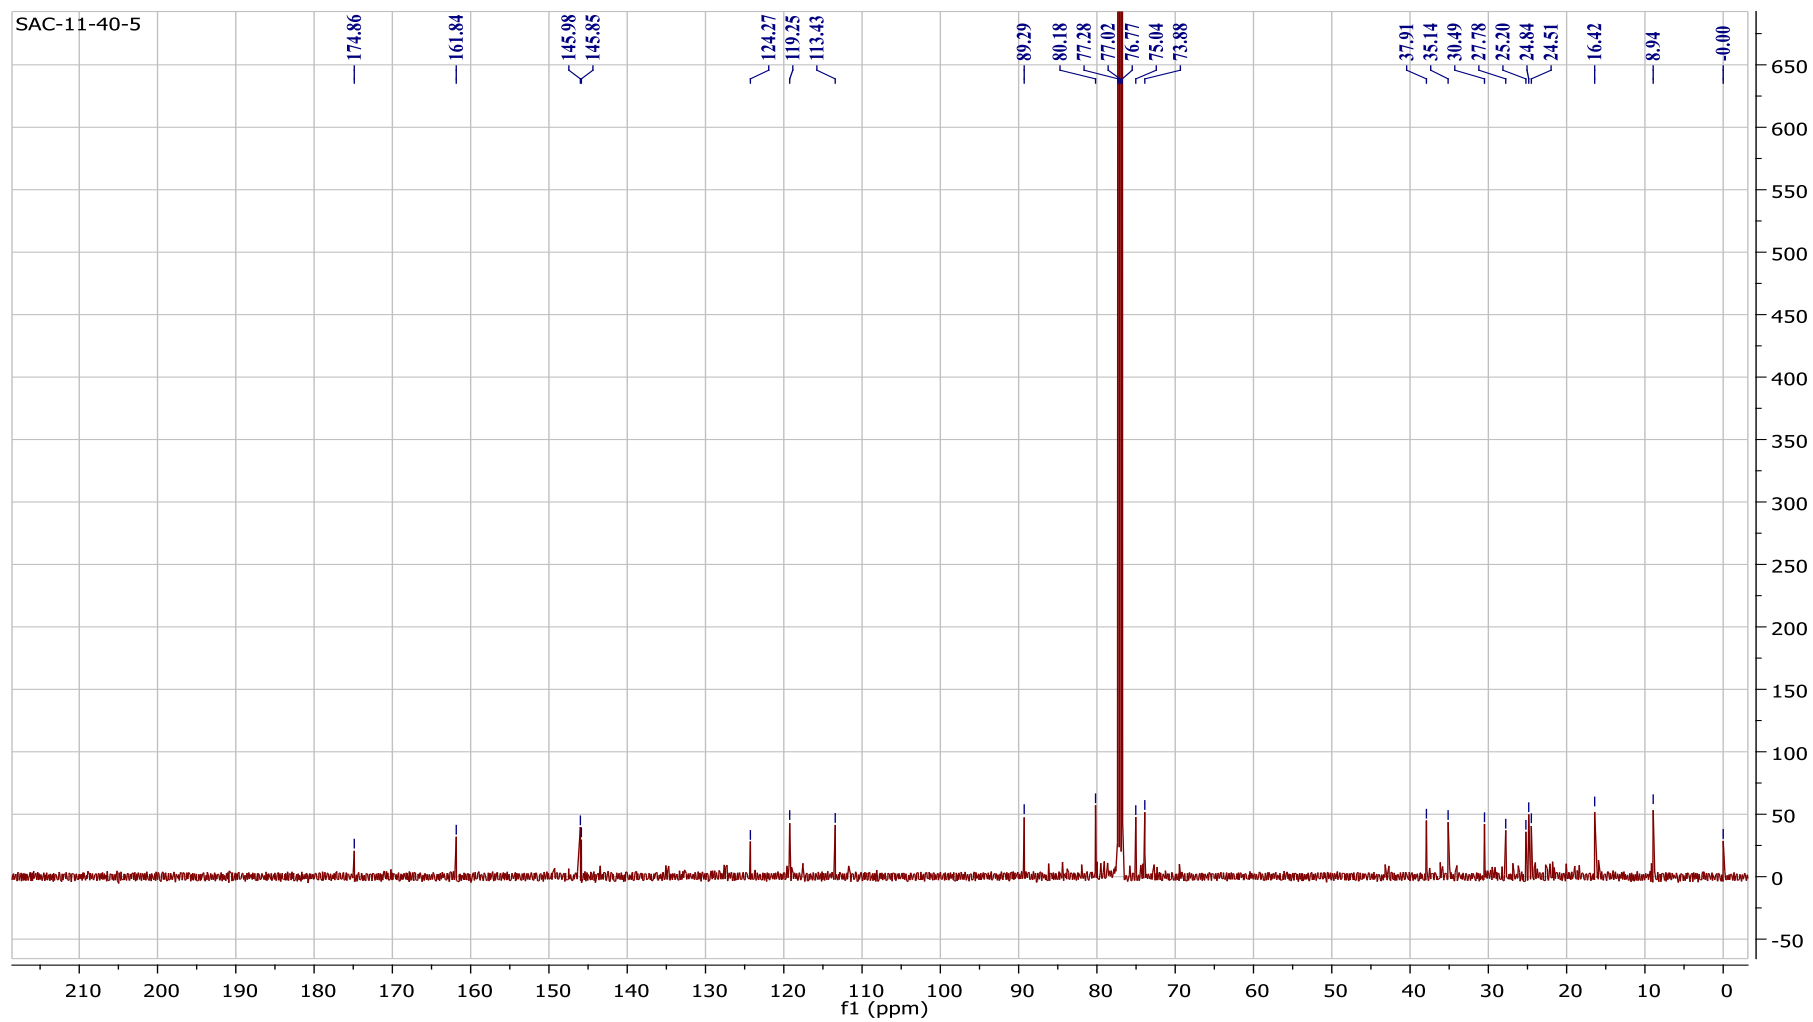

S45:  $^{13}\text{C}$  NMR of **5**



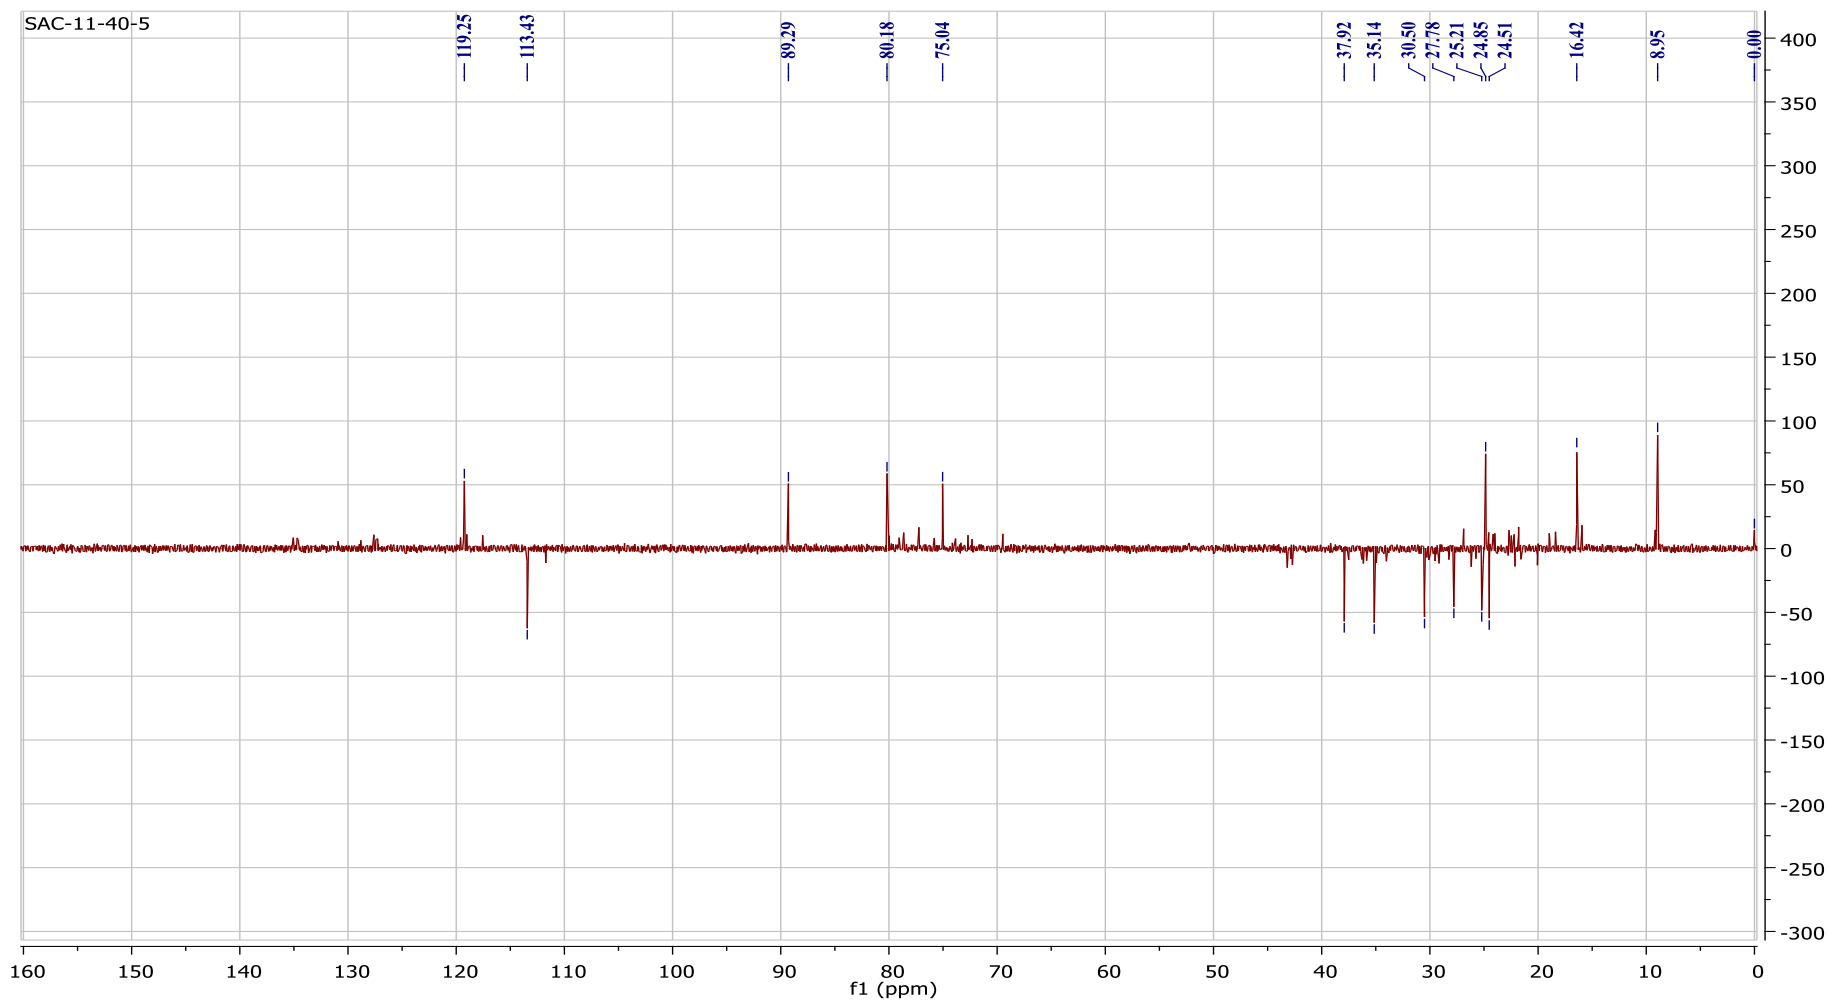

S46: DEPT of 5

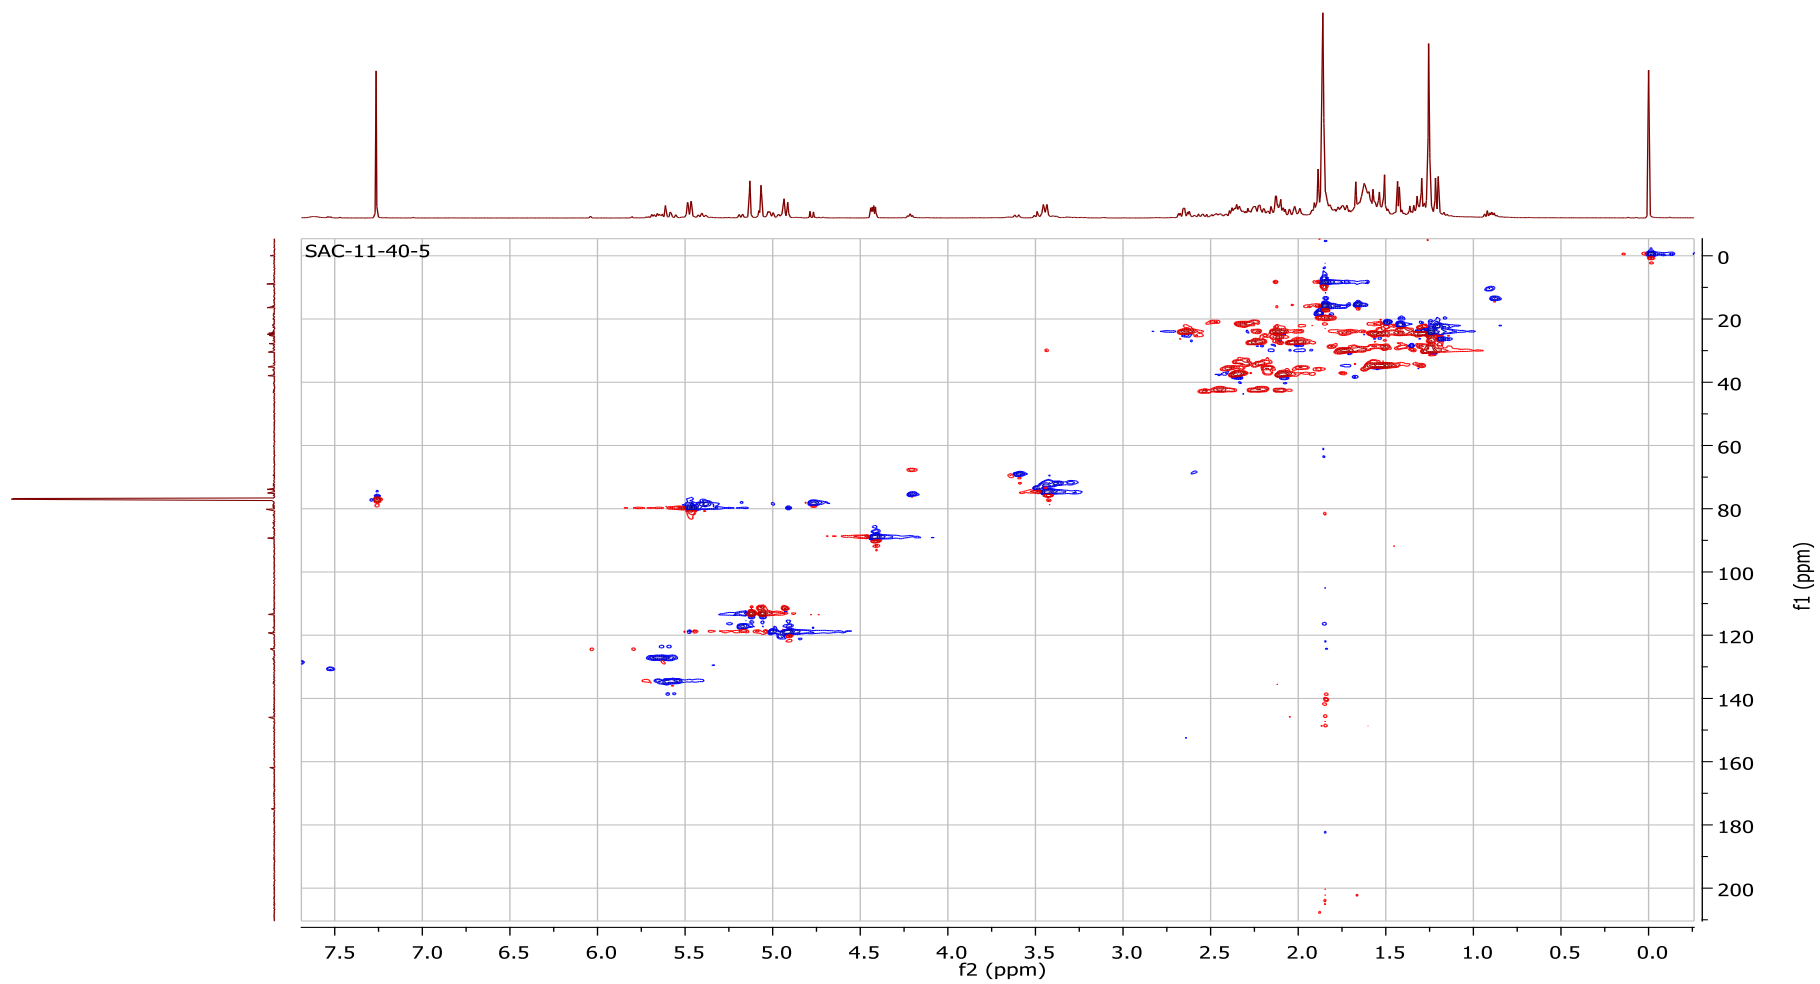

S47: HSQC of **5**

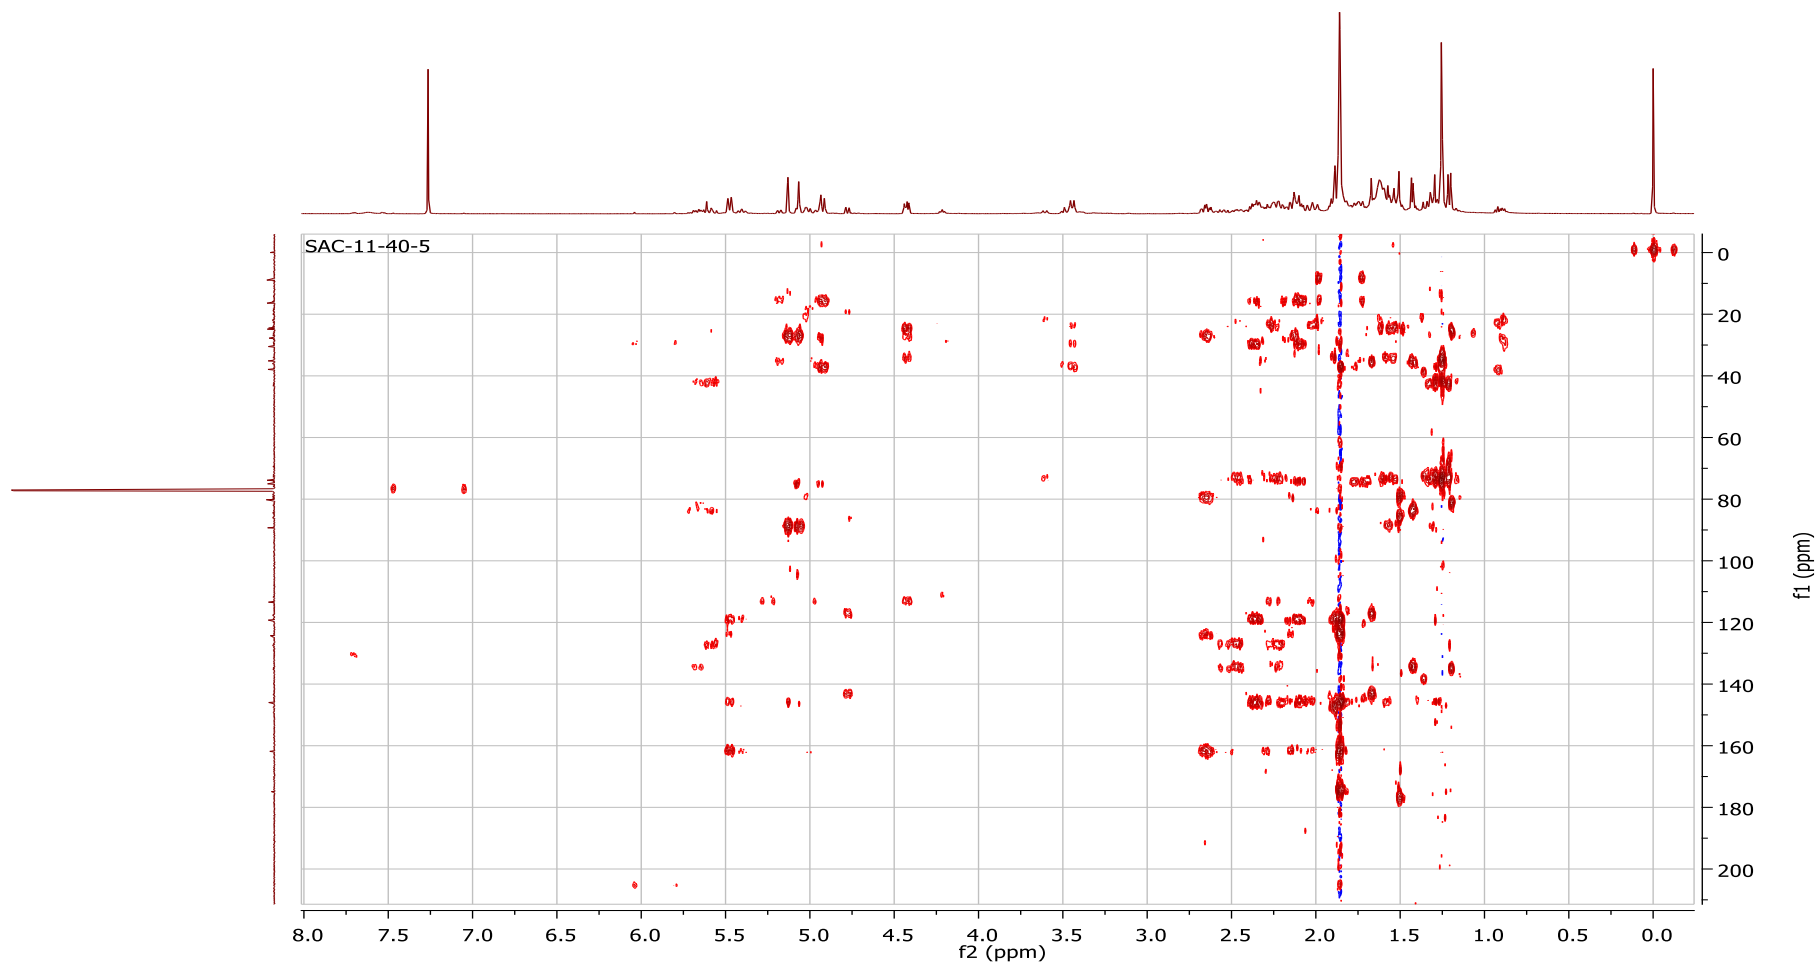

S48: HMBC of **5**

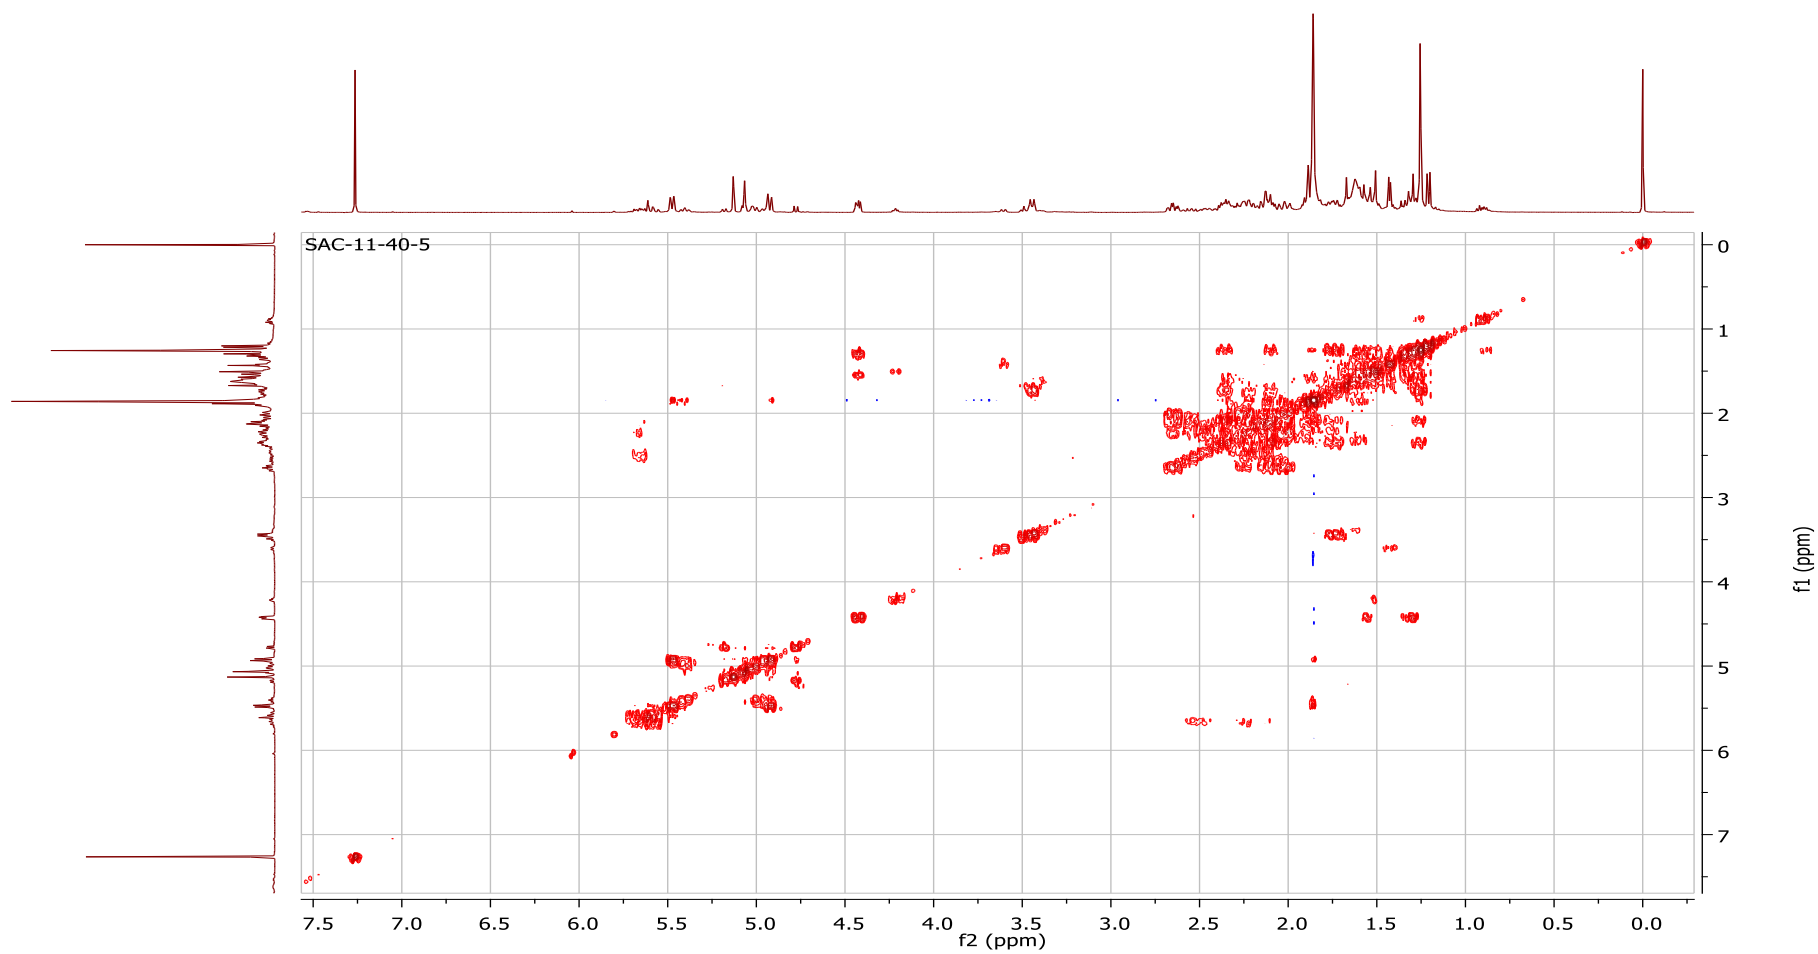

S49:  $^1\text{H}$   $^1\text{H}$  COSY of **5**

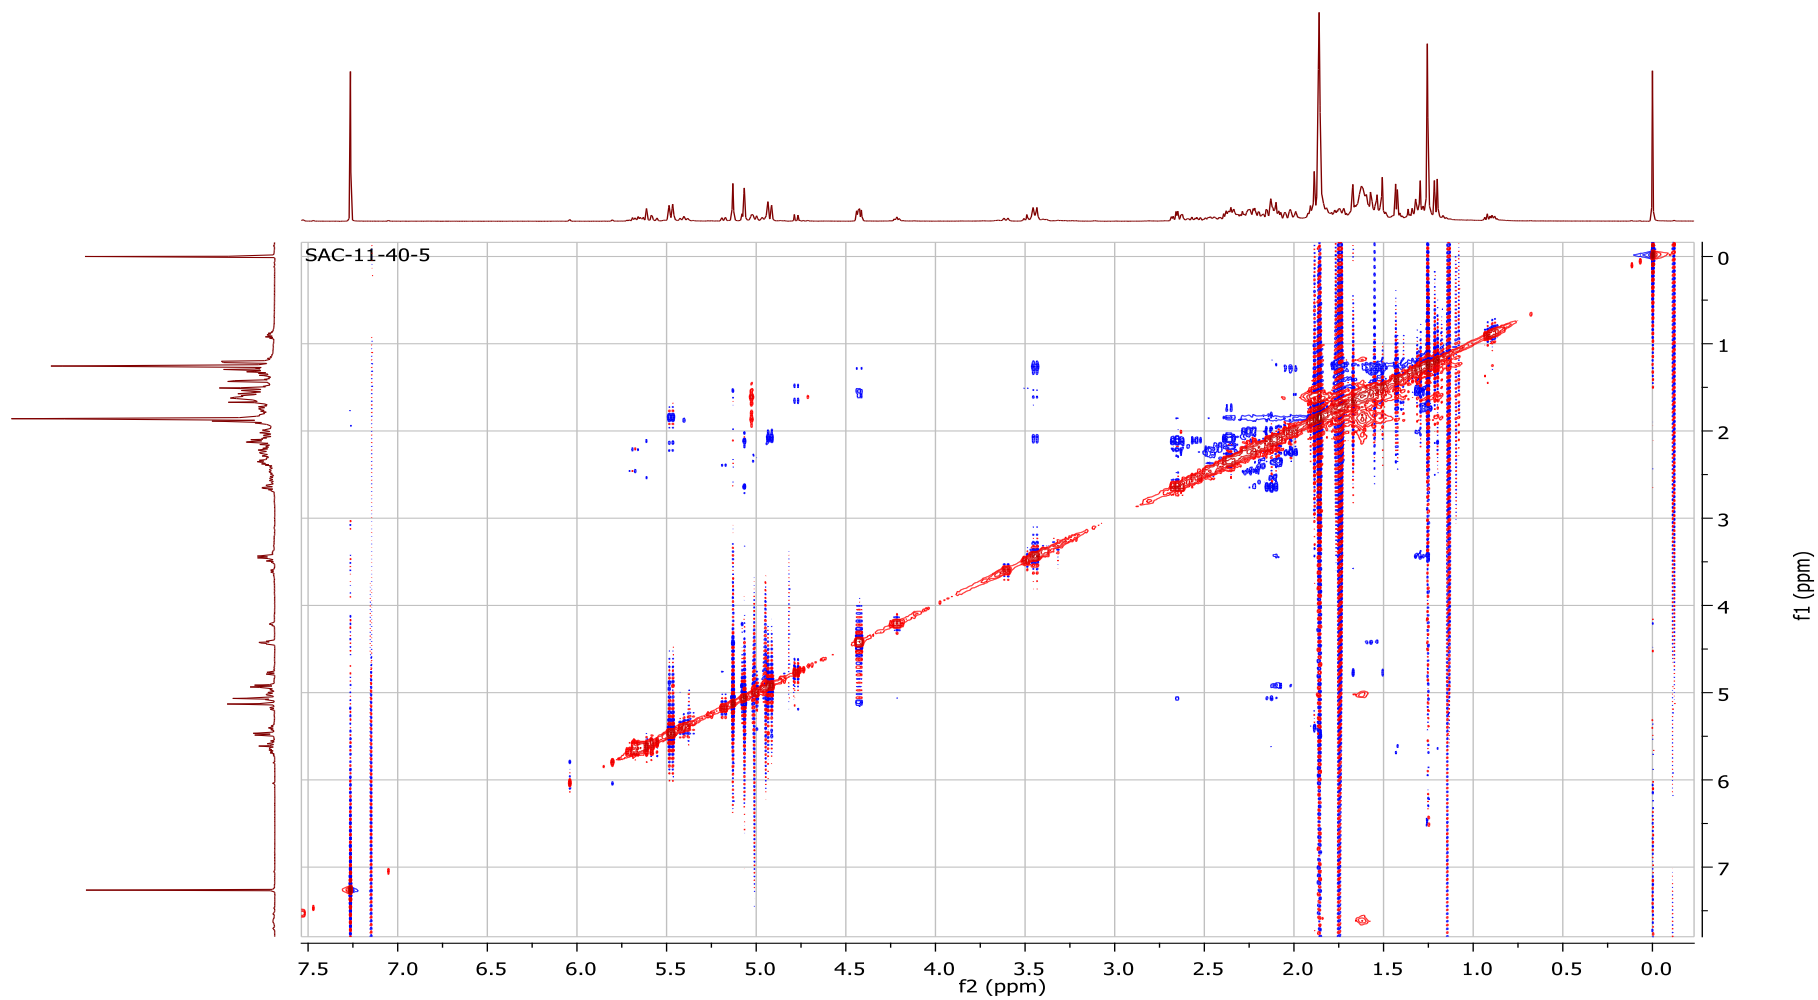

S50: NOESY of **5**
